# Supplementary material for: A novel approach to 5H-pyrazino[2,3-b]indolesviaannulation of 3-diazoindolin-2-imines with 2H-azirines or 5-alkoxyisoxazoles under Rh(ii) catalysis
Source: Royal Society of Chemistry journal article supplement (doi:10.1039/c7ob02637d), 2017-11-30

Supporting Information for

**A novel approach to 5*H*-pyrazino[2,3-*b*]indoles via annulation of  
3-diazoindolin-2-imines with 2*H*-azirines or 5-alkoxyisoxazoles under  
Rh(II) catalysis**

Julia O. Ruvinskaya, Nikolai V. Rostovskii, Ilya P. Filippov, Alexander F. Khlebnikov and  
Mikhail S. Novikov\*

St. Petersburg State University, Institute of Chemistry, 7/9 Universitetskaya nab., St. Petersburg,  
199034 Russia

\*E-mail: m.novikov@spbu.ru

**TABLE OF CONTENTS**

|                                                                                                              |    |
|--------------------------------------------------------------------------------------------------------------|----|
| General Information.....                                                                                     | 2  |
| Synthesis of 3-diazoindolin-2-imines <b>2</b> .....                                                          | 2  |
| Synthesis of 2 <i>H</i> -azirines <b>3</b> .....                                                             | 4  |
| Synthesis of 5 <i>H</i> -pyrazino[2,3- <i>b</i> ]indoles <b>4</b> .....                                      | 5  |
| Characterization data for 5 <i>H</i> -pyrazino[2,3- <i>b</i> ]indoles <b>4</b> .....                         | 6  |
| References.....                                                                                              | 17 |
| <sup>1</sup> H and <sup>13</sup> C NMR spectra of 3-diazoindolin-2-imines <b>2h–j,n,o</b> .....              | 18 |
| <sup>1</sup> H and <sup>13</sup> C NMR spectra of azirines <b>3d,l</b> .....                                 | 23 |
| <sup>1</sup> H and <sup>13</sup> C NMR spectra of 5 <i>H</i> -pyrazino[2,3- <i>b</i> ]indoles <b>4</b> ..... | 25 |
| X-Ray crystal structure of compound <b>4j</b> .....                                                          | 58 |

## General Information

Melting points were determined on a Stuart Melting Point Apparatus SMP30 and are uncorrected.  $^1\text{H}$  (400 MHz) and  $^{13}\text{C}$  (100 MHz) NMR spectra were recorded on a Bruker AVANCE 400 spectrometer in solvents indicated below. Chemical shifts ( $\delta$ ) are reported in parts per million downfield from tetramethylsilane. High-resolution mass spectra were recorded on a Bruker MaXis mass spectrometer, electrospray ionization, positive mode. IR spectrum was recorded on a FTIR-8400S Shimadzu spectrometer using KBr disc method. Thin-layer chromatography (TLC) was conducted on aluminum sheets precoated with  $\text{SiO}_2$  ALUGRAM SIL G/UV254. Column chromatography was performed on silica gel 60 M (0.04–0.063 mm). All solvents were distilled and dried prior to use. Toluene was distilled and stored over sodium metal. 1,2-Dichloroethane was washed with concentrated  $\text{H}_2\text{SO}_4$  and water, distilled from  $\text{P}_2\text{O}_5$ , and stored over anhydrous  $\text{K}_2\text{CO}_3$ . Acetonitrile was distilled from  $\text{P}_2\text{O}_5$  and redistilled from  $\text{K}_2\text{CO}_3$ . DMSO was refluxed over  $\text{CaH}_2$  and distilled in vacuo. The catalysts  $\text{Rh}_2(\text{Oct})_4$ <sup>1</sup>,  $\text{Rh}_2(\text{Piv})_4$ <sup>2</sup>, and  $\text{Rh}_2(\text{esp})_2$ <sup>3</sup> were prepared by the reported procedures and gave satisfactory elemental analyses. Isoxazoles **1a,b,d-f**,<sup>4</sup> **1c,g**,<sup>5</sup> 3-diazoindolin-2-imines **2a-g,k-m**<sup>6</sup> and azirines **3e**,<sup>7</sup> **3f,g**,<sup>8</sup> **3h**,<sup>9</sup> **3i,j**,<sup>10</sup> **3k**<sup>5</sup> were prepared by the reported procedures.

## Synthesis of 3-diazoindolin-2-imines 2

### General procedure for the synthesis of 3-diazoindolin-2-imines 2

3-Diazoindolin-2-imines **2** were prepared similarly to the reported procedure.<sup>6</sup> To an oven-dried round-bottom flask equipped with a magnetic stirring bar were added corresponding indole (10 mmol), sulfonyl azide (20 mmol), and anhydrous DMSO (20 mL). The reaction mixture was stirred at 50 °C for 18 h, then quenched with water (200 mL) and extracted with  $\text{CH}_2\text{Cl}_2$  (3  $\times$  200 mL). The combined organic layers were dried ( $\text{Na}_2\text{SO}_4$ ) and concentrated in vacuo. The crude product was purified by column chromatography on silica gel (eluent petroleum ether–EtOAc, 3:1).

Note that low conversion of indoles with electron-withdrawing substituents was observed (about 5–20%).

3-Diazoindolin-2-imines **2a-g,k-m** are known compounds and have full characterization data.<sup>6</sup>

### *N*-(3-Diazo-1-methyl-7-nitroindolin-2-ylidene)-4-methylbenzenesulfonamide (**2h**)

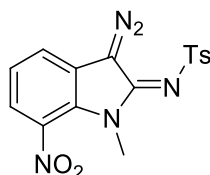

Orange solid (185 mg, yield 5%); mp 180–182 °C (dec.);  $R_f$  = 0.59 (hexane–EtOAc, 1:1);  $^1\text{H}$  NMR ( $\text{CDCl}_3$ )  $\delta$  7.91 (d,  $J$  = 8.2 Hz, 2H), 7.70 (d,  $J$  = 8.2 Hz, 1H), 7.44 (d,  $J$  = 7.7 Hz, 1H), 7.34 (d,  $J$  = 8.2 Hz, 2H), 7.31–7.26 (m, 1H), 3.46 (s, 3H), 2.46 (s, 3H);  $^{13}\text{C}$  NMR ( $\text{CDCl}_3$ )  $\delta$  156.0, 143.1, 139.2, 136.4, 129.5, 126.9, 126.5, 122.7, 122.3, 121.8, 120.2, 32.8, 21.5; HRMS–ESI [ $\text{M} + \text{H}$ ]<sup>+</sup> calcd for  $\text{C}_{16}\text{H}_{14}\text{N}_5\text{O}_4\text{S}^+$  372.0761; found 372.0774.

***N*-(6-Chloro-3-diazo-1-methylindolin-2-ylidene)-4-methylbenzenesulfonamide (2i)**

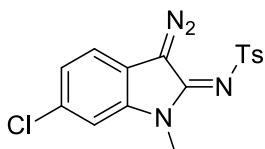

Orange solid (432 mg, yield 12%); mp 192–194 °C;  $R_f$  = 0.32 (hexane–EtOAc, 3:1); IR (KBr),  $\nu/\text{cm}^{-1}$ : 2145 (C=N<sup>+</sup>=N<sup>-</sup>); <sup>1</sup>H NMR (CDCl<sub>3</sub>)  $\delta$  7.90 (d,  $J$  = 8.2 Hz, 2H), 7.32 (d,  $J$  = 8.2 Hz, 2H), 7.22–7.14 (m, 2H), 7.10 (d,  $J$  = 1.4 Hz, 1H), 3.44 (s, 3H), 2.45 (s, 3H); <sup>13</sup>C NMR (CDCl<sub>3</sub>)  $\delta$  155.5, 142.6, 139.8, 135.0, 131.8, 129.4, 126.3, 123.0, 117.5, 117.2, 110.2, 64.3, 29.1, 21.5; HRMS–ESI [M + H]<sup>+</sup> calcd for C<sub>16</sub>H<sub>14</sub><sup>35</sup>ClN<sub>4</sub>O<sub>2</sub>S<sup>+</sup> 361.0521; found 361.0530.

***N*-(6-Bromo-3-diazo-1-methylindolin-2-ylidene)-4-methylbenzenesulfonamide (2j)**

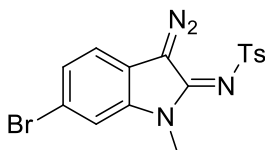

Orange solid (525 mg, yield 13%); mp 168–170 °C (dec.);  $R_f$  = 0.33 (hexane–EtOAc, 3:1); <sup>1</sup>H NMR (CDCl<sub>3</sub>)  $\delta$  7.90 (d,  $J$  = 8.2 Hz, 2H), 7.35–7.29 (m, 3H), 7.23 (s, 1H), 7.10 (d,  $J$  = 8.1 Hz, 1H), 3.43 (s, 3H), 2.44 (s, 3H); <sup>13</sup>C NMR (CDCl<sub>3</sub>)  $\delta$  155.3, 142.7, 139.8, 135.3, 129.4, 126.4, 125.8, 119.1, 117.9, 117.8, 113.0, 64.3, 29.1, 21.5; HRMS–ESI [M + H]<sup>+</sup> calcd for C<sub>16</sub>H<sub>14</sub><sup>79</sup>BrN<sub>4</sub>O<sub>2</sub>S<sup>+</sup> 405.0015; found 405.0028.

***N*-(4-Bromo-3-diazo-1-methylindolin-2-ylidene)-4-methylbenzenesulfonamide (2n)**

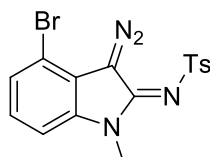

Orange solid (242 mg, yield 6%); mp 197–198 °C (dec.);  $R_f$  = 0.41 (hexane–EtOAc, 3:1); <sup>1</sup>H NMR (CDCl<sub>3</sub>)  $\delta$  7.92 (d,  $J$  = 8.2 Hz, 2H), 7.32 (d,  $J$  = 8.2 Hz, 2H), 7.29–7.26 (m, 1H), 7.13 (t,  $J$  = 8.0 Hz, 1H), 7.03 (d,  $J$  = 8.0 Hz, 1H), 3.44 (s, 3H), 2.45 (s, 3H); <sup>13</sup>C NMR (CDCl<sub>3</sub>)  $\delta$  155.9, 142.6, 140.1, 135.4, 129.3, 126.9, 126.7, 126.3, 116.7, 113.0, 108.6, 29.1, 21.5; HRMS–ESI [M + H]<sup>+</sup> calcd for C<sub>16</sub>H<sub>14</sub><sup>79</sup>BrN<sub>4</sub>O<sub>2</sub>S<sup>+</sup> 405.0015; found 405.0022.

***N*-(3-diazo-1-methyl-1,3-dihydro-2*H*-pyrrolo[2,3-*b*]pyridin-2-ylidene)-4-methylbenzenesulfonamide (2o)**

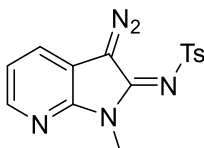

Orange solid (229 mg, yield 7%); mp 173–174 °C (dec.);  $R_f$  = 0.35 (hexane–EtOAc, 1:1); <sup>1</sup>H NMR (CDCl<sub>3</sub>)  $\delta$  8.24 (dd,  $J$  = 5.1, 1.4 Hz, 1H), 7.95–7.88 (m, 2H), 7.53 (dd,  $J$  = 7.6, 1.4 Hz, 1H), 7.32 (d,  $J$  = 8.2 Hz, 2H), 7.12 (dd,  $J$  = 7.6, 5.1 Hz, 1H), 3.54 (s, 3H), 2.45 (s, 3H); <sup>13</sup>C NMR (CDCl<sub>3</sub>)  $\delta$  155.3, 146.6, 145.4, 142.8, 139.6, 129.4, 126.4, 124.0, 118.3, 113.5, 27.9, 21.5; HRMS–ESI [M + H]<sup>+</sup> calcd for C<sub>15</sub>H<sub>14</sub>N<sub>5</sub>O<sub>2</sub>S<sup>+</sup> 328.0863; found 328.0877.

## Synthesis of 2*H*-azirines 3

### General procedure for the synthesis of azirine-2-carboxylates 3a–d and azirine-2-carboxamide 3l<sup>11</sup>

To a solution of isoxazole (0.6 mmol) in degassed acetonitrile (5 mL) was added iron(II) chloride tetrahydrate (12 mg, 0.06 mmol) under a stream of argon and the mixture was stirred at room temperature for 24 h. Then the reaction mixture was filtered through a pad of Celite and the solvent was removed in vacuo. The crude product was purified by flash chromatography on silica gel (eluent petroleum ether–EtOAc).

Azirine-2-carboxylates **3a**,<sup>5</sup> **3b**,<sup>12</sup> **3c**<sup>13</sup> are known compounds and have full characterization data.

### Methyl 3-(4-nitrophenyl)-2*H*-azirine-2-carboxylate (**3d**)

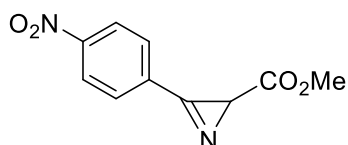

Obtained from 5-methoxy-3-(4-nitrophenyl)isoxazole.<sup>14</sup> Yellow solid (120 mg, yield 91%); mp 96–98 °C;  $R_f = 0.39$  (hexane–EtOAc, 3:1); <sup>1</sup>H NMR (CDCl<sub>3</sub>) δ 8.49–8.44 (m, 2H), 8.14–8.10 (m, 2H), 3.80 (s, 3H), 3.01 (s, 1H); <sup>13</sup>C NMR (CDCl<sub>3</sub>) δ 171.2, 158.5, 150.8, 131.3, 127.9, 124.5, 52.6, 30.3; HRMS–ESI [M + Na]<sup>+</sup> calcd for C<sub>10</sub>H<sub>8</sub>N<sub>2</sub>NaO<sub>4</sub><sup>+</sup> 243.0376; found 243.0382.

### *N*-Benzyl-*N*-methyl-3-phenyl-2*H*-azirine-2-carboxamide (**3l**)

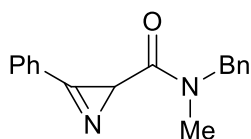

Obtained from *N*-benzyl-*N*-methyl-3-phenylisoxazol-5-amine.<sup>5</sup> Yellow oil (123 mg, yield 78%);  $R_f = 0.39$  (hexane–EtOAc, 1:1); <sup>1</sup>H NMR (CDCl<sub>3</sub>) δ (rotameric mixture ~ 1:1) 7.93 (d,  $J = 7.1$  Hz, 1H), 7.81 (d,  $J = 7.1$  Hz, 1H), 7.67–7.50 (m, 3H), 7.48–7.41 (m, 1H), 7.41–7.28 (m, 5H), 5.00 and 4.88 (AB-q,  $J = 16.8$  Hz, 1H), 4.78 and 4.56 (AB-q,  $J = 14.6$  Hz, 1H), 3.29 (s, 1.5H), 3.16 (s, 0.5H), 3.09 (s, 0.5H), 3.08 (s, 1.5H); <sup>13</sup>C NMR (CDCl<sub>3</sub>) δ (rotameric mixture ~ 1:1) 170.8, 170.5, 159.3, 159.0, 137.0, 136.8, 133.43, 133.37, 130.29, 130.26, 129.14, 129.06, 129.0, 128.6, 128.2, 127.8, 127.4, 126.5, 123.1, 123.0, 53.3, 51.5, 34.9, 34.6, 29.1, 29.0; HRMS–ESI [M + H]<sup>+</sup> calcd for C<sub>17</sub>H<sub>17</sub>N<sub>2</sub>O<sup>+</sup> 265.1335; found 265.1343.

## Synthesis of 5*H*-pyrazino[2,3-*b*]indoles **4**

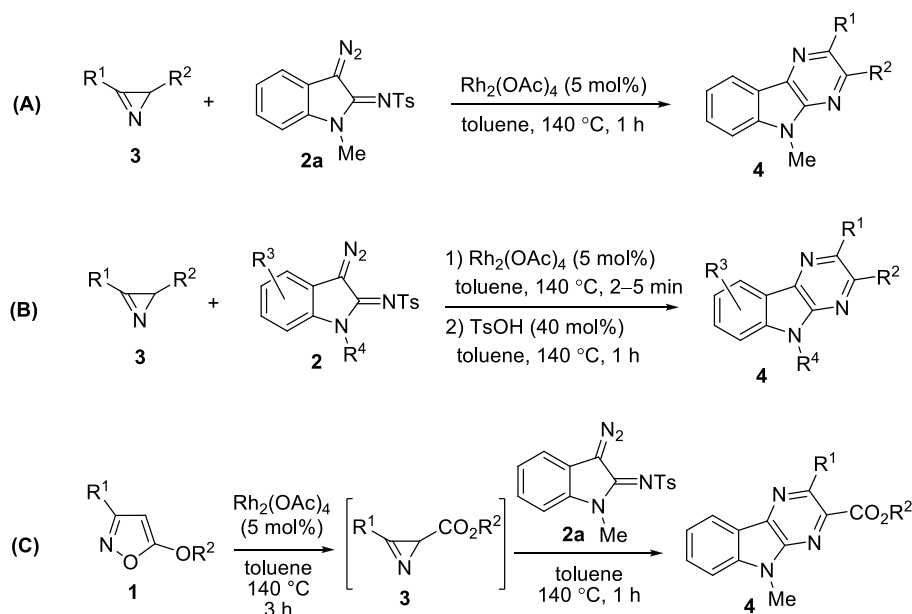

### General Procedure A (for **4a–d,i–m**)

Azirine **3** (0.2 mmol), 3-diazoindolin-2-imine **2a** (0.4–0.8 mmol),  $\text{Rh}_2(\text{OAc})_4$  (4.4 mg, 0.01 mmol), and toluene (1 mL) were placed into a screw cap glass tube and heated at 140 °C (oil bath temperature) under stirring for 1 h. The solvent was removed in vacuo, and the residue was purified by column chromatography on silica gel (eluent hexane–EtOAc, 3:1) to give the desired products.

### General Procedure B (for **4e–h,t–z,aa–af**)

Azirine **3** (0.2 mmol), 3-diazoindolin-2-imine **2** (0.4–0.6 mmol),  $\text{Rh}_2(\text{OAc})_4$  (4.4 mg, 0.01 mmol), and toluene (1 mL) were placed into a screw cap glass tube and heated at 140 °C (oil bath temperature) under stirring until nitrogen evolution had ceased (about 2–5 min). Then, for elimination of *p*-toluenesulfinic acid, to the reaction mixture was added *p*-toluenesulfonic acid (14 mg, 0.08 mmol). The resulting mixture was stirred at 140 °C for 1 h and then concentrated in vacuo. The residue was purified by column chromatography on silica gel (eluent hexane–EtOAc, 3:1) to give the desired products.

### General Procedure C (for **4a,n–s**)

5-Alkoxyisoxazole **1** (0.2 mmol),  $\text{Rh}_2(\text{OAc})_4$  (4.4 mg, 0.01 mmol), and toluene (1 mL) were placed into a screw cap glass tube and heated at 140 °C (oil bath temperature) under stirring for 3 h until full consumption of isoxazole was detected (control by TLC, eluent hexane–Et<sub>2</sub>O, 3:1). Then 3-diazoindolin-2-imine **2a** (0.6 mmol) was added to the reaction mixture. The resulting mixture was stirred at 140 °C for 1 h and then concentrated in vacuo. The residue was purified by column chromatography on silica gel (eluent hexane–EtOAc, 3:1) to give the desired products.

## Characterization data for 5*H*-pyrazino[2,3-*b*]indoles 4

### Methyl 5-methyl-2-phenyl-5*H*-pyrazino[2,3-*b*]indole-3-carboxylate (**4a**)

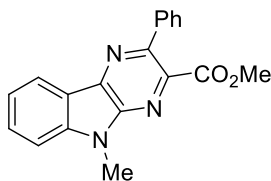

Obtained from azirine **3a** and 3-diazoindolin-2-imine **2a** (0.6 mmol) according to the general procedure A (55 mg, yield 87%). Also obtained from isoxazole **1a** and 3-diazoindolin-2-imine **2a** (0.6 mmol) according to the general procedure C (47 mg, yield 75%). White solid; mp 143–145 °C;  $R_f$  = 0.37 (hexane–EtOAc, 3:1);  $^1\text{H}$  NMR ( $\text{CDCl}_3$ )  $\delta$  8.46 (d,  $J$  = 7.8 Hz, 1H), 7.76–7.69 (m, 3H), 7.58–7.40 (m, 5H), 4.04 (s, 3H), 3.84 (s, 3H);  $^{13}\text{C}$  NMR ( $\text{CDCl}_3$ )  $\delta$  168.1, 145.8, 143.3, 143.0, 139.2, 138.9, 136.8, 130.1, 128.8, 128.39, 128.38, 122.4, 121.2, 119.2, 109.6, 52.7, 27.8; HRMS–ESI [ $\text{M} + \text{Na}$ ] $^+$  calcd for  $\text{C}_{19}\text{H}_{15}\text{N}_3\text{NaO}_2^+$  340.1056; found 340.1070.

### Methyl 2-(4-methoxyphenyl)-5-methyl-5*H*-pyrazino[2,3-*b*]indole-3-carboxylate (**4b**)

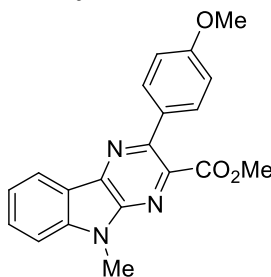

Obtained from azirine **3b** and 3-diazoindolin-2-imine **2a** (0.6 mmol) according to the general procedure A as a white solid (58 mg, yield 84%); mp 151–153 °C;  $R_f$  = 0.20 (hexane–EtOAc, 3:1);  $^1\text{H}$  NMR ( $\text{CDCl}_3$ )  $\delta$  8.44 (d,  $J$  = 7.8 Hz, 1H), 7.73–7.65 (m, 3H), 7.53 (d,  $J$  = 8.3 Hz, 1H), 7.44–7.38 (m, 1H), 7.08–7.03 (m, 2H), 4.02 (s, 3H), 3.90 (s, 3H), 3.87 (s, 3H);  $^{13}\text{C}$  NMR ( $\text{CDCl}_3$ )  $\delta$  168.4, 160.0, 145.5, 143.3, 142.9, 138.9, 136.8, 131.4, 130.1 (2C), 122.4, 121.1, 119.3, 114.0, 109.6, 55.3, 52.8, 27.8; HRMS–ESI [ $\text{M} + \text{H}$ ] $^+$  calcd for  $\text{C}_{20}\text{H}_{18}\text{N}_3\text{O}_3^+$  348.1343; found 348.1335.

### Methyl 2-(4-bromophenyl)-5-methyl-5*H*-pyrazino[2,3-*b*]indole-3-carboxylate (**4c**)

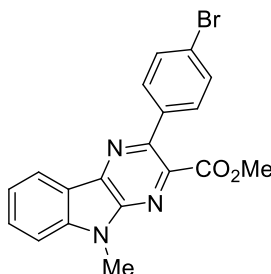

Obtained from azirine **3c** and 3-diazoindolin-2-imine **2a** (0.4 mmol) according to the general procedure A as a white solid (51 mg, yield 65%); mp 167–169 °C;  $R_f$  = 0.48 (hexane–EtOAc, 3:1);  $^1\text{H}$  NMR ( $\text{CDCl}_3$ )  $\delta$  8.44 (d,  $J$  = 7.8 Hz, 1H), 7.76–7.70 (m, 1H), 7.68–7.57 (m, 4H), 7.55 (d,  $J$  = 8.3 Hz, 1H), 7.43 (t,  $J$  = 7.5 Hz, 1H), 4.03 (s, 3H), 3.87 (s, 3H);  $^{13}\text{C}$  NMR ( $\text{CDCl}_3$ )  $\delta$  167.8, 144.7, 143.5, 143.2, 138.9, 138.0, 137.0, 131.6, 130.5, 130.4, 122.9, 122.5, 121.4, 119.1,

109.7, 52.9, 27.9; HRMS-ESI  $[M + Na]^+$  calcd for  $C_{19}H_{14}^{79}BrN_3NaO_2^+$  418.0162; found 418.0169.

#### Methyl 5-methyl-2-(4-nitrophenyl)-5H-pyrazino[2,3-b]indole-3-carboxylate (4d)

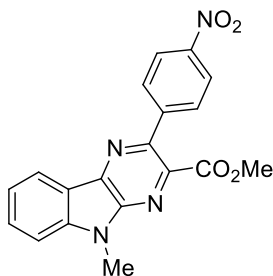

Obtained from azirine **3d** and 3-diazoindolin-2-imine **2a** (0.6 mmol) according to the general procedure A as a white solid (40 mg, yield 55%); mp 224–225 °C;  $R_f = 0.49$  (hexane–EtOAc, 3:1);  $^1H$  NMR ( $CDCl_3$ )  $\delta$  8.46 (d,  $J = 7.8$  Hz, 1H), 8.41–8.35 (m, 2H), 7.92–7.85 (m, 2H), 7.81–7.75 (m, 1H), 7.60 (d,  $J = 8.3$  Hz, 1H), 7.50–7.44 (m, 1H), 4.07 (s, 3H), 3.89 (s, 3H);  $^{13}C$  NMR ( $CDCl_3$ )  $\delta$  167.3, 147.7, 145.6, 143.7 (2C), 143.4, 138.9, 137.2, 130.8, 129.9, 123.5, 122.6, 121.7, 119.0, 109.9, 53.0, 28.0; HRMS-ESI  $[M + H]^+$  calcd for  $C_{19}H_{15}N_4O_4^+$  363.1088; found 363.1090.

#### 5-Methyl-2,3-diphenyl-5H-pyrazino[2,3-b]indole (4e)

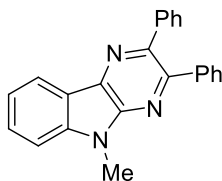

Obtained from azirine **3e** and 3-diazoindolin-2-imine **2a** (0.4 mmol) according to the general procedure B (62 mg, yield 93%). Also obtained from azirine **3e** and 3-diazoindolin-2-imine **2b** (0.4 mmol) according to the general procedure B (40 mg, yield 60%). White solid; mp 202–203 °C;  $R_f = 0.47$  (hexane–EtOAc, 3:1);  $^1H$  NMR ( $CDCl_3$ )  $\delta$  8.47 (d,  $J = 7.8$  Hz, 1H), 7.70–7.64 (m, 1H), 7.60–7.51 (m, 5H), 7.43–7.31 (m, 7H), 4.04 (s, 3H);  $^{13}C$  NMR ( $CDCl_3$ )  $\delta$  148.3, 145.5, 144.3, 142.4, 140.3, 140.0, 134.1, 130.27, 130.26, 128.8, 128.1, 128.0 (2C), 127.5, 121.9, 120.7, 119.8, 109.3, 27.6; HRMS-ESI  $[M + H]^+$  calcd for  $C_{23}H_{18}N_3^+$  336.1495; found 336.1507.

#### 3-(4-Chlorophenyl)-5-methyl-2-phenyl-5H-pyrazino[2,3-b]indole (4f)

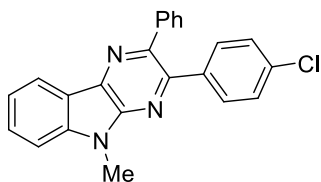

Obtained from azirine **3f** and 3-diazoindolin-2-imine **2a** (0.4 mmol) according to the general procedure B as a white solid (73 mg, yield 99%); mp 198–200 °C;  $R_f = 0.40$  (hexane–EtOAc, 3:1);  $^1H$  NMR ( $CDCl_3$ )  $\delta$  8.46 (d,  $J = 7.8$  Hz, 1H), 7.71–7.64 (m, 1H), 7.55–7.49 (m, 5H), 7.43–7.35 (m, 4H), 7.34–7.29 (m, 2H), 4.02 (s, 3H);  $^{13}C$  NMR ( $CDCl_3$ )  $\delta$  146.9, 145.3, 144.3, 142.5, 140.1, 138.5, 134.4, 134.2, 131.6, 130.2, 129.0, 128.31, 128.28, 127.7, 122.0, 120.9, 119.7, 109.4, 27.6; HRMS-ESI  $[M + H]^+$  calcd for  $C_{23}H_{17}^{35}ClN_3^+$  370.1106; found 370.1119.

### 2-(4-Chlorophenyl)-5-methyl-3-phenyl-5H-pyrazino[2,3-b]indole (4g)

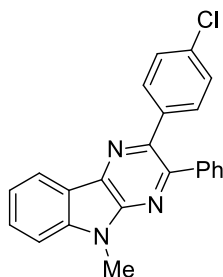

Obtained from azirine **3g** and 3-diazoindolin-2-imine **2a** (0.6 mmol) according to the general procedure B as a white solid (51 mg, yield 69%); mp 220–222 °C;  $R_f$  = 0.65 (hexane–EtOAc, 3:1);  $^1\text{H}$  NMR ( $\text{CDCl}_3$ )  $\delta$  8.44 (d,  $J$  = 7.8 Hz, 1H), 7.70–7.64 (m, 1H), 7.57–7.51 (m, 3H), 7.50–7.45 (m, 2H), 7.43–7.35 (m, 4H), 7.34–7.29 (m, 2H), 4.02 (s, 3H);  $^{13}\text{C}$  NMR ( $\text{CDCl}_3$ )  $\delta$  148.3, 144.4, 144.1, 142.4, 139.8, 138.8, 134.2, 133.6, 131.6, 130.2, 129.0, 128.33, 128.25 (2C), 121.9, 120.9, 119.7, 109.4, 27.6; HRMS–ESI  $[\text{M} + \text{H}]^+$  calcd for  $\text{C}_{23}\text{H}_{17}^{35}\text{ClN}_3^+$  370.1106; found 370.1119.

### 3,5-Dimethyl-2-phenyl-5H-pyrazino[2,3-b]indole (4h)

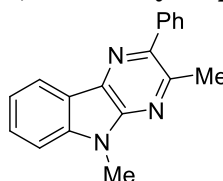

Obtained from azirine **3h** and 3-diazoindolin-2-imine **2a** (0.4 mmol) according to the general procedure B as a white solid (40 mg, yield 73%); mp 150–151 °C;  $R_f$  = 0.41 (hexane–EtOAc, 3:1);  $^1\text{H}$  NMR ( $\text{CDCl}_3$ )  $\delta$  8.40 (d,  $J$  = 7.8 Hz, 1H), 7.69–7.66 (m, 2H), 7.65–7.60 (m, 1H), 7.56–7.48 (m, 3H), 7.48–7.43 (m, 1H), 7.40–7.34 (m, 1H), 3.99 (s, 3H), 2.77 (s, 3H);  $^{13}\text{C}$  NMR ( $\text{CDCl}_3$ )  $\delta$  147.1, 146.2, 144.4, 141.6, 140.3, 133.3, 129.5, 128.30, 128.29, 127.8, 121.5, 120.6, 119.9, 109.2, 27.4, 23.8; HRMS–ESI  $[\text{M} + \text{H}]^+$  calcd for  $\text{C}_{18}\text{H}_{16}\text{N}_3^+$  274.1339; found 274.1352.

### 5-Methyl-2-(4-methylphenyl)-5H-pyrazino[2,3-b]indole (4i)

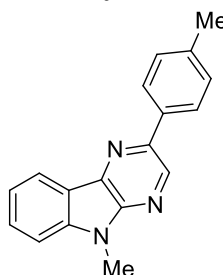

Azirine **3i** (0.2 mmol), 3-diazoindolin-2-imine **2a** (0.24 mmol),  $\text{Rh}_2(\text{OAc})_4$  (4.4 mg, 0.01 mmol), and 1,2-dichloroethane (1 mL) were placed into a screw cap glass tube and heated at 115 °C (oil bath temperature) under stirring for 1 h. The solvent was removed in vacuo, and the residue was purified by column chromatography on silica gel (eluent hexane–EtOAc, 3:1) to give **4i** as a white solid (20 mg, yield 37%): mp 140–142 °C;  $R_f$  = 0.40 (hexane–EtOAc, 3:1);  $^1\text{H}$  NMR ( $\text{CDCl}_3$ )  $\delta$  8.85 (s, 1H), 8.46 (d,  $J$  = 7.8 Hz, 1H), 8.04 (d,  $J$  = 8.1 Hz, 2H), 7.68–7.63 (m, 1H), 7.50 (d,  $J$  = 8.2 Hz, 1H), 7.43–7.34 (m, 3H), 3.98 (s, 3H), 2.47 (s, 3H);  $^{13}\text{C}$  NMR ( $\text{CDCl}_3$ )  $\delta$  145.4, 144.5, 141.9, 138.3, 137.2, 135.4, 135.3, 129.6, 128.9, 126.7, 121.9, 120.7, 119.9, 109.3, 27.5, 21.2; HRMS–ESI  $[\text{M} + \text{H}]^+$  calcd for  $\text{C}_{18}\text{H}_{16}\text{N}_3^+$  274.1339; found 274.1346.



#### 2-(4-Methoxyphenyl)-5-methyl-5H-pyrazino[2,3-b]indole (4j)

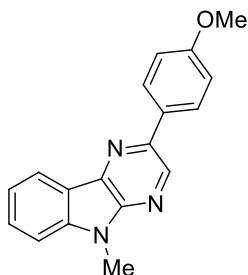

Obtained from azirine **3j** and 3-diazoindolin-2-imine **2a** as described above for the synthesis of **4i**. White solid (30 mg, yield 52%); mp 112–114 °C;  $R_f = 0.30$  (hexane–EtOAc, 3:1);  $^1\text{H NMR}$  ( $\text{CDCl}_3$ )  $\delta$  8.83 (s, 1H), 8.46 (d,  $J = 7.8$  Hz, 1H), 8.12–8.06 (m, 2H), 7.69–7.63 (m, 1H), 7.52 (d,  $J = 8.2$  Hz, 1H), 7.43–7.37 (m, 1H), 7.12–7.06 (m, 2H), 4.00 (s, 3H), 3.92 (s, 3H);  $^{13}\text{C NMR}$  ( $\text{CDCl}_3$ )  $\delta$  160.0, 145.2, 144.3, 141.9, 136.8, 135.3, 130.8, 128.8, 128.0, 121.8, 120.6, 119.8, 114.3, 109.3, 55.4, 27.5; HRMS–ESI  $[\text{M} + \text{H}]^+$  calcd for  $\text{C}_{18}\text{H}_{16}\text{N}_3\text{O}^+$  290.1288; found 290.1299.

#### tert-Butyl 5-methyl-2-phenyl-5H-pyrazino[2,3-b]indole-3-carboxylate (4k)

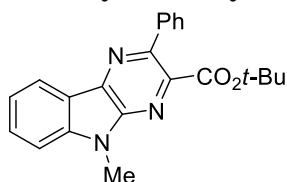

Obtained from azirine **3k** and 3-diazoindolin-2-imine **2a** (0.6 mmol) according to the general procedure A as a white solid (50 mg, yield 70%); mp 165–166 °C;  $R_f = 0.37$  (hexane–EtOAc, 3:1);  $^1\text{H NMR}$  ( $\text{CDCl}_3$ )  $\delta$  8.44 (d,  $J = 7.8$  Hz, 1H), 7.73–7.67 (m, 3H), 7.56–7.45 (m, 4H), 7.43–7.37 (m, 1H), 4.04 (s, 3H), 1.38 (s, 9H);  $^{13}\text{C NMR}$  ( $\text{CDCl}_3$ )  $\delta$  166.6, 145.7, 143.3, 143.1, 140.9, 139.6, 136.2, 129.8, 129.2, 128.3, 128.2, 122.4, 121.0, 119.3, 109.5, 82.8, 27.8, 27.6; HRMS–ESI  $[\text{M} + \text{H}]^+$  calcd for  $\text{C}_{22}\text{H}_{22}\text{N}_3\text{O}_2^+$  360.1707; found 360.1723.

#### N-Benzyl-N,5-dimethyl-2-phenyl-5H-pyrazino[2,3-b]indole-3-carboxamide (4l)

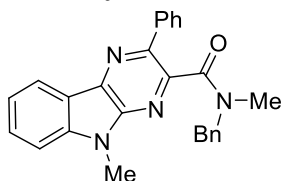

Obtained from azirine **3l** and 3-diazoindolin-2-imine **2a** (0.6 mmol) according to the general procedure A as a yellow oil (64 mg, yield 79%);  $R_f = 0.51$  (hexane–EtOAc, 1:1);  $^1\text{H NMR}$  ( $\text{CDCl}_3$ )  $\delta$  (rotameric mixture ~ 1:1.5) 8.48–8.41 (m, 1H), 7.94 (d,  $J = 6.8$  Hz, 0.8H), 7.89–7.82 (m, 1.2H), 7.74–7.65 (m, 1H), 7.58–7.46 (m, 4H), 7.45–7.38 (m, 1H), 7.33–7.25 (m, 2H), 7.25–7.21 (m, 1H), 7.13–7.09 (m, 1.2H), 7.07–7.03 (m, 0.8H), 4.73 (s, 1.2H), 4.08 (s, 0.8H), 4.03 (s, 1.8H), 3.97 (s, 1.2H), 2.95 (s, 1.2H), 2.52 (s, 1.8H);  $^{13}\text{C NMR}$  ( $\text{CDCl}_3$ )  $\delta$  (rotameric mixture ~ 1:1.3) 169.4, 169.0, 143.6, 143.5, 143.3, 143.09, 143.07, 142.70, 142.69, 137.97, 137.95, 136.06, 136.05, 135.9, 135.6, 129.63, 129.62, 129.2, 129.1, 128.65, 128.63, 128.61, 128.52, 128.50, 128.46, 128.3, 127.6, 127.43, 127.38, 122.1, 121.10, 121.09, 119.5, 109.6, 109.5, 54.1, 50.3, 35.1, 32.2, 27.8, 27.7; HRMS–ESI  $[\text{M} + \text{H}]^+$  calcd for  $\text{C}_{26}\text{H}_{23}\text{N}_4\text{O}^+$  407.1866; found 407.1867.

**[3-(4-Bromophenyl)-1*H*-pyrazol-1-yl](5-methyl-2-phenyl-5*H*-pyrazino[2,3-*b*]indol-3-yl)methanone (4m)**

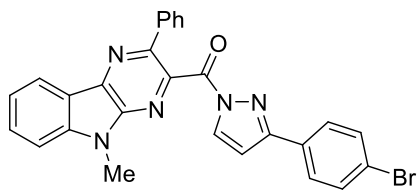

Obtained from azirine **3m** and 3-diazoindolin-2-imine **2a** (0.8 mmol) according to the general procedure A (reaction time: 5 min) as a white solid (82 mg, yield 81%); mp 171–172 °C;  $R_f = 0.47$  (hexane–EtOAc, 3:1);  $^1\text{H NMR}$  ( $\text{CDCl}_3$ )  $\delta$  8.53 (d,  $J = 7.8$  Hz, 1H), 8.33 (d,  $J = 2.9$  Hz, 1H), 7.78–7.70 (m, 3H), 7.58 (d,  $J = 8.3$  Hz, 1H), 7.50–7.45 (m, 5H), 7.36–7.30 (m, 2H), 7.28–7.24 (m, 1H), 6.65 (d,  $J = 2.9$  Hz, 1H), 4.03 (s, 3H);  $^{13}\text{C NMR}$  ( $\text{CDCl}_3$ )  $\delta$  166.4, 155.0, 145.8, 143.3, 143.2, 140.5, 138.3, 136.9, 131.7, 130.5, 130.3, 130.2, 128.7, 128.42, 128.40, 127.9, 123.4, 122.5, 121.3, 119.4, 109.7, 107.8, 27.9; HRMS–ESI  $[\text{M} + \text{H}]^+$  calcd for  $\text{C}_{27}\text{H}_{19}^{79}\text{BrN}_5\text{O}^+$  508.0767; found 508.0791.

**Methyl 2-(2,4-dimethylphenyl)-5-methyl-5*H*-pyrazino[2,3-*b*]indole-3-carboxylate (4n)**

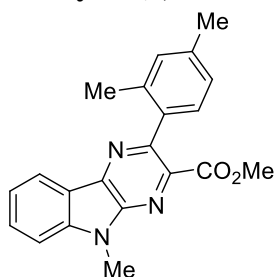

Obtained from isoxazole **1b** and 3-diazoindolin-2-imine **2a** according to the general procedure C as a white solid (65 mg, yield 94%); mp 181–182 °C;  $R_f = 0.29$  (hexane–EtOAc, 3:1);  $^1\text{H NMR}$  ( $\text{CDCl}_3$ )  $\delta$  8.44 (d,  $J = 7.8$  Hz, 1H), 7.76–7.68 (m, 1H), 7.56 (d,  $J = 8.3$  Hz, 1H), 7.41 (t,  $J = 7.5$  Hz, 1H), 7.22–7.08 (m, 3H), 4.06 (s, 3H), 3.80 (s, 3H), 2.42 (s, 3H), 2.21 (s, 3H);  $^{13}\text{C NMR}$  ( $\text{CDCl}_3$ )  $\delta$  167.0, 147.3, 143.5, 143.1, 138.8, 138.0, 136.9, 136.1, 135.9, 131.0, 130.3, 129.1, 126.3, 122.6, 121.2, 119.1, 109.6, 52.6, 27.8, 21.3, 19.8; HRMS–ESI  $[\text{M} + \text{H}]^+$  calcd for  $\text{C}_{21}\text{H}_{20}\text{N}_3\text{O}_2^+$  346.1550; found 346.1563.

**Methyl 2-(2,5-dimethylphenyl)-5-methyl-5*H*-pyrazino[2,3-*b*]indole-3-carboxylate (4o)**

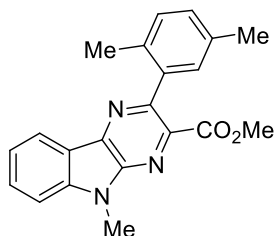

Obtained from isoxazole **1c** and 3-diazoindolin-2-imine **2a** according to the general procedure C as a white solid (53 mg, yield 77%); mp 124–126 °C;  $R_f = 0.29$  (hexane–EtOAc, 3:1);  $^1\text{H NMR}$  ( $\text{CDCl}_3$ )  $\delta$  8.46 (d,  $J = 7.8$  Hz, 1H), 7.73 (t,  $J = 7.7$  Hz, 1H), 7.57 (d,  $J = 8.3$  Hz, 1H), 7.42 (t,  $J = 7.5$  Hz, 1H), 7.25–7.17 (m, 2H), 7.13 (s, 1H), 4.07 (s, 3H), 3.79 (s, 3H), 2.39 (s, 3H), 2.17 (s, 3H);  $^{13}\text{C NMR}$  ( $\text{CDCl}_3$ )  $\delta$  166.9, 147.4, 143.5, 143.2, 138.7, 138.6, 136.9, 134.9, 133.2, 130.3, 130.0, 129.8, 129.2, 122.6, 121.2, 119.1, 109.6, 52.6, 27.8, 20.9, 19.3; HRMS–ESI  $[\text{M} + \text{H}]^+$  calcd for  $\text{C}_{21}\text{H}_{20}\text{N}_3\text{O}_2^+$  346.1550; found 346.1558.

**Methyl 2-(4-chlorophenyl)-5-methyl-5H-pyrazino[2,3-b]indole-3-carboxylate (4p)**

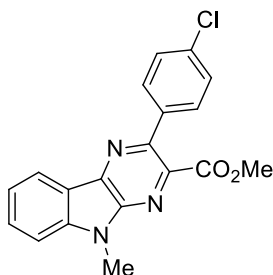

Obtained from isoxazole **1d** and 3-diazoindolin-2-imine **2a** according to the general procedure C as a white solid (52 mg, yield 74%); mp 153–155 °C;  $R_f = 0.45$  (hexane–EtOAc, 3:1);  $^1\text{H NMR}$  ( $\text{CDCl}_3$ )  $\delta$  8.45 (d,  $J = 7.8$  Hz, 1H), 7.78–7.71 (m, 1H), 7.68–7.63 (m, 2H), 7.57 (d,  $J = 8.3$  Hz, 1H), 7.52–7.47 (m, 2H), 7.44 (t,  $J = 7.5$  Hz, 1H), 4.05 (s, 3H), 3.87 (s, 3H);  $^{13}\text{C NMR}$  ( $\text{CDCl}_3$ )  $\delta$  167.9, 144.7, 143.5, 143.1, 138.9, 137.5, 136.9, 134.7, 130.4, 130.2, 128.6, 122.5, 121.4, 119.1, 109.7, 52.9, 27.9; HRMS–ESI  $[\text{M} + \text{H}]^+$  calcd for  $\text{C}_{19}\text{H}_{15}^{35}\text{ClN}_3\text{O}_2^+$  352.0847; found 352.0860.

**Methyl 2-(4-cyanophenyl)-5-methyl-5H-pyrazino[2,3-b]indole-3-carboxylate (4q)**

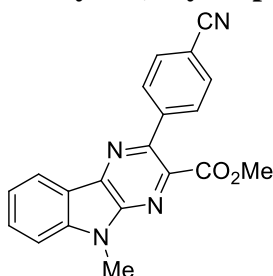

Obtained from isoxazole **1e** and 3-diazoindolin-2-imine **2a** according to the general procedure C as a white solid (36 mg, yield 53%); mp 205–206 °C;  $R_f = 0.30$  (hexane–EtOAc, 3:1);  $^1\text{H NMR}$  ( $\text{CDCl}_3$ )  $\delta$  8.43 (d,  $J = 7.8$  Hz, 1H), 7.84–7.78 (m, 4H), 7.75 (t,  $J = 7.7$  Hz, 1H), 7.57 (d,  $J = 8.3$  Hz, 1H), 7.45 (t,  $J = 7.5$  Hz, 1H), 4.04 (s, 3H), 3.88 (s, 3H);  $^{13}\text{C NMR}$  ( $\text{CDCl}_3$ )  $\delta$  167.4, 144.0, 143.6 (2C), 143.3, 138.8, 137.1, 132.1, 130.7, 129.6, 122.5, 121.7, 119.0, 118.7, 112.0, 109.9, 52.9, 27.9; HRMS–ESI  $[\text{M} + \text{H}]^+$  calcd for  $\text{C}_{20}\text{H}_{15}\text{N}_4\text{O}_2^+$  343.1190; found 343.1193.

**Methyl 2-(2,3-dihydrobenzo[*b*][1,4]dioxin-6-yl)-5-methyl-5H-pyrazino[2,3-*b*]indole-3-carboxylate (4r)**

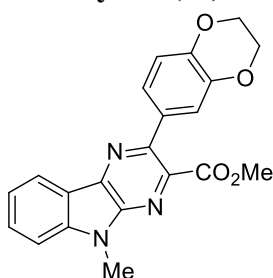

Obtained from isoxazole **1f** and 3-diazoindolin-2-imine **2a** according to the general procedure C as a white solid (62 mg, yield 83%); mp 180–182 °C;  $R_f = 0.30$  (hexane–EtOAc, 3:1);  $^1\text{H NMR}$  ( $\text{CDCl}_3$ )  $\delta$  8.43 (d,  $J = 7.8$  Hz, 1H), 7.70 (t,  $J = 7.6$  Hz, 1H), 7.52 (d,  $J = 8.2$  Hz, 1H), 7.40 (t,  $J = 7.5$  Hz, 1H), 7.32 (d,  $J = 2.0$  Hz, 1H), 7.16 (dd,  $J = 8.3, 2.0$  Hz, 1H), 6.98 (d,  $J = 8.3$  Hz, 1H), 4.34 (s, 4H), 4.01 (s, 3H), 3.90 (s, 3H);  $^{13}\text{C NMR}$  ( $\text{CDCl}_3$ )  $\delta$  168.2, 145.1, 144.1, 143.6, 143.3, 142.9, 139.0, 136.7, 132.2, 130.1, 122.4, 122.0, 121.2, 119.2, 117.9, 117.2, 109.6, 64.5, 64.3, 52.8, 27.8; HRMS–ESI  $[\text{M} + \text{H}]^+$  calcd for  $\text{C}_{21}\text{H}_{18}\text{N}_3\text{O}_4^+$  376.1292 found 376.1298.

#### Hexyl 5-methyl-2-phenyl-5H-pyrazino[2,3-b]indole-3-carboxylate (4s)

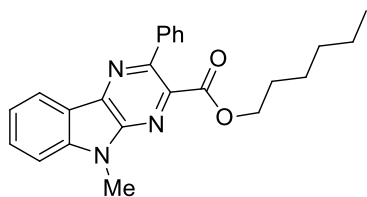

Obtained from isoxazole **1g** and 3-diazoindolin-2-imine **2a** according to the general procedure C as a white solid (61 mg, yield 79%);  $R_f = 0.57$  (hexane–EtOAc, 3:1);  $^1\text{H NMR}$  ( $\text{CDCl}_3$ )  $\delta$  8.45 (d,  $J = 7.9$  Hz, 1H), 7.75–7.68 (m, 3H), 7.56–7.39 (m, 5H), 4.22 (t,  $J = 6.6$  Hz, 2H), 4.03 (s, 3H), 1.51–1.42 (m, 2H), 1.34–1.07 (m, 6H), 0.89 (t,  $J = 7.1$  Hz, 3H);  $^{13}\text{C NMR}$  ( $\text{CDCl}_3$ )  $\delta$  168.0, 145.7, 143.25, 143.15, 139.8, 139.1, 136.6, 130.0, 128.9, 128.40, 128.35, 122.4, 121.2, 119.3, 109.6, 66.2, 31.3, 28.1, 27.8, 25.3, 22.4, 13.9; HRMS–ESI  $[\text{M} + \text{H}]^+$  calcd for  $\text{C}_{24}\text{H}_{26}\text{N}_3\text{O}_2^+$  388.2020; found 388.2027.

#### 5-Benzyl-2,3-diphenyl-5H-pyrazino[2,3-b]indole (4t)

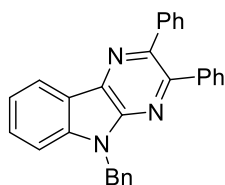

Obtained from azirine **3e** and 3-diazoindolin-2-imine **2c** (0.4 mmol) according to the general procedure B as a white solid (59 mg, yield 72%); mp 205–206 °C;  $R_f = 0.49$  (hexane–EtOAc, 3:1);  $^1\text{H NMR}$  ( $\text{CDCl}_3$ )  $\delta$  8.48 (d,  $J = 7.8$  Hz, 1H), 7.60–7.54 (m, 5H), 7.45 (d,  $J = 8.2$  Hz, 1H), 7.41–7.27 (m, 12H), 5.77 (s, 2H);  $^{13}\text{C NMR}$  ( $\text{CDCl}_3$ )  $\delta$  148.4, 145.9, 144.3, 141.6, 140.4, 139.9, 136.8, 134.0, 130.34, 130.25, 128.8, 128.7, 128.2, 128.05, 127.98, 127.61, 127.60, 127.3, 122.0, 120.9, 120.1, 110.3, 45.1; HRMS–ESI  $[\text{M} + \text{H}]^+$  calcd for  $\text{C}_{29}\text{H}_{22}\text{N}_3^+$  412.1808; found 412.1825.

#### 5-Isopropyl-2,3-diphenyl-5H-pyrazino[2,3-b]indole (4u)

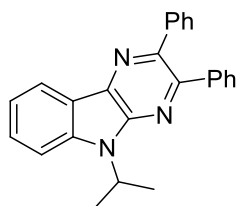

Obtained from azirine **3e** and 3-diazoindolin-2-imine **2d** (0.4 mmol) according to the general procedure B as a white solid (52 mg, yield 72%); mp 141–143 °C;  $R_f = 0.63$  (hexane–EtOAc, 9:1);  $^1\text{H NMR}$  ( $\text{CDCl}_3$ )  $\delta$  8.48 (d,  $J = 7.8$  Hz, 1H), 7.69–7.61 (m, 2H), 7.58–7.50 (m, 4H), 7.40–7.30 (m, 7H), 5.43 (sept,  $J = 7.0$  Hz, 1H), 1.82 (d,  $J = 7.0$  Hz, 6H);  $^{13}\text{C NMR}$  ( $\text{CDCl}_3$ )  $\delta$  147.9, 145.2, 143.9, 140.9, 140.5, 140.2, 134.0, 130.35, 130.25, 128.5, 128.1, 128.0, 127.9, 127.5, 122.1, 120.25, 120.21, 110.8, 46.0, 20.9; HRMS–ESI  $[\text{M} + \text{H}]^+$  calcd for  $\text{C}_{25}\text{H}_{22}\text{N}_3^+$  364.1808; found 364.1817.

### 5-Allyl-2,3-diphenyl-5H-pyrazino[2,3-b]indole (4v)

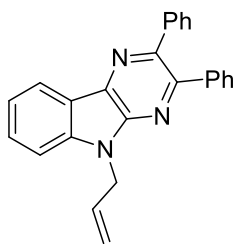

Obtained from azirine **3e** and 3-diazoindolin-2-imine **2e** (0.4 mmol) according to the general procedure B as a white solid (71 mg, yield 98%); mp 164–165 °C;  $R_f$  = 0.57 (hexane–EtOAc, 9:1);  $^1\text{H}$  NMR ( $\text{CDCl}_3$ )  $\delta$  8.46 (d,  $J$  = 7.8 Hz, 1H), 7.63 (t,  $J$  = 7.7 Hz, 1H), 7.57–7.50 (m, 5H), 7.40 (t,  $J$  = 7.5 Hz, 1H), 7.37–7.31 (m, 6H), 6.15–6.04 (m, 1H), 5.30–5.16 (m, 4H);  $^{13}\text{C}$  NMR ( $\text{CDCl}_3$ )  $\delta$  148.3, 145.8, 143.9, 141.7, 140.3, 140.0, 134.0, 132.4, 130.3, 130.2, 128.7, 128.1, 128.02, 127.99, 127.6, 122.0, 120.8, 119.9, 117.4, 110.2, 43.7; HRMS–ESI  $[\text{M} + \text{H}]^+$  calcd for  $\text{C}_{25}\text{H}_{20}\text{N}_3^+$  362.1652; found 362.1660.

### 2,3-Diphenyl-5H-pyrazino[2,3-b]indole (4w)

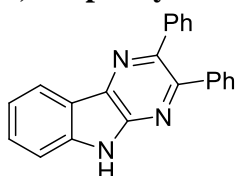

Obtained from azirine **3e** and 3-diazoindolin-2-imine **2f** (0.4 mmol) according to the general procedure B as a white solid (29 mg, yield 45%); mp 279–281 °C;  $R_f$  = 0.49 (hexane–EtOAc, 3:1);  $^1\text{H}$  NMR ( $\text{DMSO-d}_6$ )  $\delta$  12.21 (s, 1H), 8.25 (d,  $J$  = 7.8 Hz, 1H), 7.65–7.58 (m, 2H), 7.46–7.39 (m, 4H), 7.37–7.28 (m, 7H);  $^{13}\text{C}$  NMR ( $\text{DMSO-d}_6$ )  $\delta$  147.9, 144.8, 144.1, 141.1, 140.1, 139.7, 133.3, 130.0, 129.9, 129.0, 127.94, 127.93, 127.91, 127.4, 121.1, 120.6, 119.3, 112.2; HRMS–ESI  $[\text{M} + \text{H}]^+$  calcd for  $\text{C}_{22}\text{H}_{16}\text{N}_3^+$  322.1339; found 322.1351.

### 6-Bromo-5-methyl-2,3-diphenyl-5H-pyrazino[2,3-b]indole (4x)

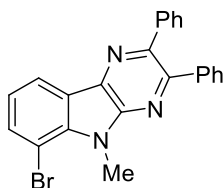

Obtained from azirine **3e** and 3-diazoindolin-2-imine **2g** (0.4 mmol) according to the general procedure B as a white solid (72 mg, yield 87%); mp 239–241 °C;  $R_f$  = 0.64 (hexane–EtOAc, 9:1);  $^1\text{H}$  NMR ( $\text{CDCl}_3$ )  $\delta$  8.40 (d,  $J$  = 7.7 Hz, 1H), 7.67 (d,  $J$  = 7.7 Hz, 1H), 7.59–7.51 (m, 4H), 7.39–7.32 (m, 6H), 7.20 (t,  $J$  = 7.8 Hz, 1H), 4.43 (s, 3H);  $^{13}\text{C}$  NMR ( $\text{CDCl}_3$ )  $\delta$  149.3, 146.5, 144.8, 140.0, 139.7, 138.9, 133.8, 133.2, 130.3, 130.2, 128.25, 128.16, 128.1, 127.7, 123.0, 121.7, 120.9, 103.9, 30.7; HRMS–ESI  $[\text{M} + \text{H}]^+$  calcd for  $\text{C}_{23}\text{H}_{17}^{79}\text{BrN}_3^+$  414.0600; found 414.0619.

#### 5-Methyl-6-nitro-2,3-diphenyl-5H-pyrazino[2,3-b]indole (4y)

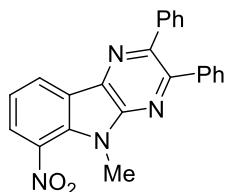

Obtained from azirine **3e** and 3-diazoindolin-2-imine **2h** (0.4 mmol) according to the general procedure B as a white solid (50 mg, yield 66%); mp 244–245 °C;  $R_f = 0.49$  (hexane–EtOAc, 3:1);  $^1\text{H NMR}$  ( $\text{CDCl}_3$ )  $\delta$  8.71 (dd,  $J = 7.7, 2.0$  Hz, 1H), 8.17 (dd,  $J = 8.0, 2.0$  Hz, 1H), 7.59–7.51 (m, 4H), 7.44 (t,  $J = 7.9$  Hz, 1H), 7.40–7.33 (m, 6H), 4.11 (s, 3H);  $^{13}\text{C NMR}$  ( $\text{CDCl}_3$ )  $\delta$  150.4, 147.8, 145.6, 139.6, 139.3, 136.5, 133.7, 132.5, 130.2, 130.1, 128.6, 128.3, 128.2, 128.1, 126.8, 125.3, 124.3, 119.9, 31.4; HRMS–ESI  $[\text{M} + \text{H}]^+$  calcd for  $\text{C}_{23}\text{H}_{17}\text{N}_4\text{O}_2^+$  381.1346; found 381.1352.

#### 7-Chloro-5-methyl-2,3-diphenyl-5H-pyrazino[2,3-b]indole (4z)

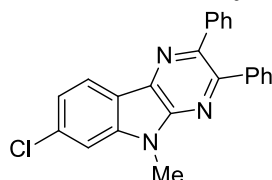

Obtained from azirine **3e** and 3-diazoindolin-2-imine **2i** (0.4 mmol) according to the general procedure B as a white solid (50 mg, yield 68%); mp 232–234 °C;  $R_f = 0.57$  (hexane–EtOAc, 9:1);  $^1\text{H NMR}$  ( $\text{CDCl}_3$ )  $\delta$  8.35 (d,  $J = 8.3$  Hz, 1H), 7.58–7.49 (m, 5H), 7.38–7.31 (m, 7H), 4.00 (s, 3H);  $^{13}\text{C NMR}$  ( $\text{CDCl}_3$ )  $\delta$  148.7, 146.1, 144.6, 142.8, 140.1, 139.8, 134.7, 133.5, 130.23, 130.18, 128.19, 128.16, 128.1, 127.7, 122.8, 121.4, 118.3, 109.7, 27.7; HRMS–ESI  $[\text{M} + \text{H}]^+$  calcd for  $\text{C}_{23}\text{H}_{17}^{35}\text{ClN}_3^+$  370.1106; found 370.1105.

#### 7-Bromo-5-methyl-2,3-diphenyl-5H-pyrazino[2,3-b]indole (4aa)

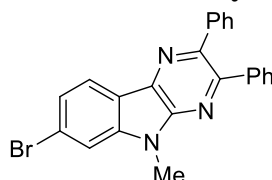

Obtained from azirine **3e** and 3-diazoindolin-2-imine **2j** (0.4 mmol) according to the general procedure B as a white solid (53 mg, yield 64%); mp 250–252 °C;  $R_f = 0.59$  (hexane–EtOAc, 9:1);  $^1\text{H NMR}$  ( $\text{CDCl}_3$ )  $\delta$  8.29 (d,  $J = 8.3$  Hz, 1H), 7.69 (s, 1H), 7.58–7.48 (m, 5H), 7.38–7.31 (m, 6H), 4.00 (s, 3H);  $^{13}\text{C NMR}$  ( $\text{CDCl}_3$ )  $\delta$  148.8, 146.2, 144.4, 142.9, 140.1, 139.8, 133.5, 130.23, 130.19, 128.21, 128.17, 128.1, 127.7, 124.1, 123.0, 122.7, 118.7, 112.7, 27.7; HRMS–ESI  $[\text{M} + \text{H}]^+$  calcd for  $\text{C}_{23}\text{H}_{17}^{79}\text{BrN}_3^+$  414.0600; found 414.0594.

### 5,8-Dimethyl-2,3-diphenyl-5H-pyrazino[2,3-b]indole (4ab)

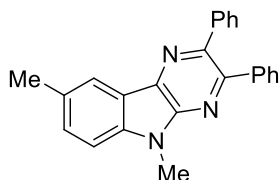

Obtained from azirine **3e** and 3-diazoindolin-2-imine **2k** (0.4 mmol) according to the general procedure B as a white solid (67 mg, yield 96%); mp 231–232 °C;  $R_f = 0.52$  (hexane–EtOAc, 3:1);  $^1\text{H NMR}$  ( $\text{CDCl}_3$ )  $\delta$  8.27 (s, 1H), 7.59–7.51 (m, 4H), 7.48 (dd,  $J = 8.4, 1.6$  Hz, 1H), 7.42 (d,  $J = 8.4$  Hz, 1H), 7.38–7.31 (m, 6H), 4.01 (s, 3H), 2.59 (s, 3H);  $^{13}\text{C NMR}$  ( $\text{CDCl}_3$ )  $\delta$  148.1, 145.2, 144.5, 140.7, 140.4, 140.1, 134.0, 130.3, 130.24, 130.23, 130.17, 128.1, 128.02, 127.97, 127.4, 121.7, 119.8, 109.0, 27.6, 21.3; HRMS–ESI  $[\text{M} + \text{H}]^+$  calcd for  $\text{C}_{24}\text{H}_{20}\text{N}_3^+$  350.1652; found 315.1660.

### 8-Methoxy-5-methyl-2,3-diphenyl-5H-pyrazino[2,3-b]indole (4ac)

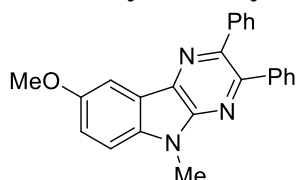

Obtained from azirine **3e** and 3-diazoindolin-2-imine **2l** (0.4 mmol) according to the general procedure B as a white solid (62 mg, yield 85%); mp 199–200 °C;  $R_f = 0.43$  (hexane–EtOAc, 3:1);  $^1\text{H NMR}$  ( $\text{CDCl}_3$ )  $\delta$  7.94 (d,  $J = 2.4$  Hz, 1H), 7.59–7.50 (m, 4H), 7.44 (d,  $J = 7.9$  Hz, 1H), 7.38–7.28 (m, 7H), 4.01 (s, 3H), 3.97 (s, 3H);  $^{13}\text{C NMR}$  ( $\text{CDCl}_3$ )  $\delta$  154.8, 148.3, 145.1, 144.6, 140.4, 140.0, 137.2, 133.9, 130.3, 130.2, 128.1, 128.02, 128.01, 127.5, 119.9, 118.9, 110.3, 103.5, 56.0, 27.6; HRMS–ESI  $[\text{M} + \text{H}]^+$  calcd for  $\text{C}_{24}\text{H}_{20}\text{N}_3\text{O}^+$  366.1601; found 366.1613.

### 8-Bromo-5-methyl-2,3-diphenyl-5H-pyrazino[2,3-b]indole (4ad)

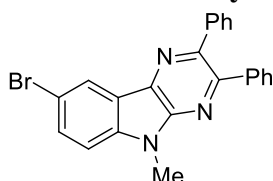

Obtained from azirine **3e** and 3-diazoindolin-2-imine **2m** (0.4 mmol) according to the general procedure B as a white solid (82 mg, yield 99%); mp 228–229 °C;  $R_f = 0.63$  (hexane–EtOAc, 3:1);  $^1\text{H NMR}$  ( $\text{CDCl}_3$ )  $\delta$  8.58 (d,  $J = 1.9$  Hz, 1H), 7.73 (dd,  $J = 8.7, 1.9$  Hz, 1H), 7.58–7.49 (m, 4H), 7.40 (d,  $J = 8.7$  Hz, 1H), 7.37–7.34 (m, 6H), 4.01 (s, 3H);  $^{13}\text{C NMR}$  ( $\text{CDCl}_3$ )  $\delta$  149.2, 146.1, 144.4, 140.8, 140.0, 139.7, 132.8, 131.4, 130.24, 130.16, 128.3, 128.2, 128.1, 127.7, 124.6, 121.3, 113.7, 110.9, 27.7; HRMS–ESI  $[\text{M} + \text{H}]^+$  calcd for  $\text{C}_{23}\text{H}_{17}^{79}\text{BrN}_3^+$  414.0600; found 414.0614.

### 9-Bromo-5-methyl-2,3-diphenyl-5H-pyrazino[2,3-*b*]indole (4ae)

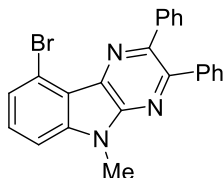

Obtained from azirine **3e** and 3-diazoindolin-2-imine **2n** (0.6 mmol) according to the general procedure B as a white solid (69 mg, yield 84%); mp 235–236 °C;  $R_f = 0.59$  (hexane–EtOAc, 3:1);  $^1\text{H NMR}$  ( $\text{CDCl}_3$ )  $\delta$  7.66–7.54 (m, 5H), 7.52–7.46 (m, 2H), 7.41–7.30 (m, 6H), 4.04 (s, 3H);  $^{13}\text{C NMR}$  ( $\text{CDCl}_3$ )  $\delta$  148.7, 145.6, 144.0, 143.2, 140.06, 140.05, 133.5, 130.4, 130.2, 128.9, 128.3, 128.2, 128.0, 127.6, 124.9, 118.7, 117.1, 108.2, 27.7; HRMS–ESI  $[\text{M} + \text{H}]^+$  calcd for  $\text{C}_{23}\text{H}_{17}^{79}\text{BrN}_3^+$  414.0600; found 414.0617.

### 5-Methyl-2,3-diphenyl-5H-pyrido[3',2':4,5]pyrrolo[2,3-*b*]pyrazine (4af)

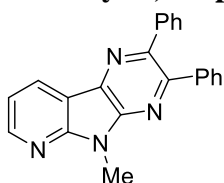

Obtained from azirine **3e** and 3-diazoindolin-2-imine **2o** (0.5 mmol) according to the general procedure B as a white solid (59 mg, yield 88%); mp 203–204 °C;  $R_f = 0.20$  (hexane–EtOAc, 3:1);  $^1\text{H NMR}$  ( $\text{CDCl}_3$ )  $\delta$  8.72–8.66 (m, 2H), 7.60–7.48 (m, 4H), 7.39–7.31 (m, 7H), 4.13 (s, 3H);  $^{13}\text{C NMR}$  ( $\text{CDCl}_3$ )  $\delta$  152.9, 149.5, 148.8, 146.7, 144.2, 140.0, 139.6, 132.0, 130.3, 130.12, 130.07, 128.3, 128.2, 128.1, 127.8, 116.8, 113.5, 26.5; HRMS–ESI  $[\text{M} + \text{H}]^+$  calcd for  $\text{C}_{22}\text{H}_{17}\text{N}_4^+$  337.1448; found 337.1463.

### Methyl 5-methyl-4-(4-methylphenylsulfonyl)-2-phenyl-4,5-dihydro-3H-pyrazino[2,3-*b*]indole-3-carboxylate (5a)

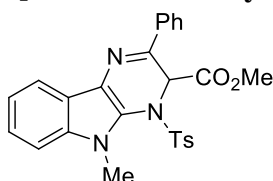

Obtained from azirine **3a** and 3-diazoindolin-2-imine **2a** (0.6 mmol) according to the general procedure A (temperature: 110 °C, reaction time: 2 min) as a white solid (53 mg, yield 56%); mp 100–103 °C;  $R_f = 0.47$  (hexane–EtOAc, 3:1);  $^1\text{H NMR}$  ( $\text{CDCl}_3$ )  $\delta$  7.82 (d,  $J = 7.8$  Hz, 1H), 7.74–7.69 (m, 2H), 7.45 (d,  $J = 8.2$  Hz, 1H), 7.43–7.34 (m, 4H), 7.28–7.23 (m, 1H), 7.11 (d,  $J = 8.2$  Hz, 2H), 6.77 (d,  $J = 8.2$  Hz, 2H), 6.03 (s, 1H), 4.04 (s, 3H), 3.60 (s, 3H), 2.22 (s, 3H);  $^{13}\text{C NMR}$  ( $\text{CDCl}_3$ )  $\delta$  166.8, 147.5, 145.0, 136.6, 135.7, 132.8, 129.7, 129.2, 128.1, 127.0, 126.8, 124.6, 123.0, 122.1, 120.9, 120.0, 118.4, 110.1, 58.1, 53.2, 31.2, 21.5; HRMS–ESI  $[\text{M} + \text{H}]^+$  calcd for  $\text{C}_{26}\text{H}_{24}\text{N}_3\text{O}_4\text{S}^+$  474.1482; found 474.1499.



## References

1. A.-M. Giroud-Godquin, J.-C. Marchon, D. Guillon and A. Skoulios, *J. Phys. Chem.*, 1986, **90**, 5502.
2. F. A. Cotton and T. R. Felthouse, *Inorg. Chem.*, 1980, **19**, 323.
3. K. P. Kornecki and J. F. Berry, *Eur. J. Inorg. Chem.*, 2012, **2012**, 562.
4. I. A. Smetanin, M. S. Novikov, A. V. Agafonova, N. V. Rostovskii, A. F. Khlebnikov, I. V. Kudryavtsev, M. A. Terpilowski, M. K. Serebriakova, A. S. Trulioff and N. V. Goncharov, *Org. Biomol. Chem.*, 2016, **14**, 4479.
5. N. V. Rostovskii, A. V. Agafonova, I. A. Smetanin, M. S. Novikov, A. F. Khlebnikov, J. O. Ruvinskaya and G. L. Starova, *Synthesis*, 2017, **49**, 4478.
6. G. R. Sheng, K. Huang, Z. H. Chi, H. L. Ding, Y. P. Xing, P. Lu and Y. G. Wang, *Org. Lett.*, 2014, **16**, 5096;
7. F. W. Fowler, A. Hassner and L. A. Levy, *J. Am. Chem. Soc.*, 1967, **89**, 2077.
8. K. Okamoto, A. Mashida, M. Watanabe and K. Ohe, *Chem. Commun.*, 2012, **48**, 3554.
9. H. Bader and H.-J. Hansen, *Helv. Chim. Acta*, 1978, **61**, 286.
10. A. Hortmann, D. Robertson and B. Gillard, *J. Org. Chem.*, 1972, **37**, 322.
11. S. Auricchio, A. Bini, E. Pastormerlo and A. M. Truscello, *Tetrahedron*, 1997, **53**, 10911.
12. N. S. Y. Loy, A. Singh, X. Xu and C.-M. Park, *Angew. Chem., Int. Ed.*, 2013, **52**, 2212.
13. D. An, X. Guan, R. Guan, L. Jin, G. Zhang and S. Zhang, *Chem. Commun.*, 2016, **52**, 11211.
14. N. V. Rostovskii, J. O. Ruvinskaya, M. S. Novikov, A. F. Khlebnikov, I. A. Smetanin, A. V. Agafonova, *J. Org. Chem.*, 2017, **82**, 256.

# $^1\text{H}$ and $^{13}\text{C}$ NMR spectra of 3-diazoindolin-2-imines 2h-j,n,o

## $^1\text{H}$ and $^{13}\text{C}$ NMR spectra of compound 2h

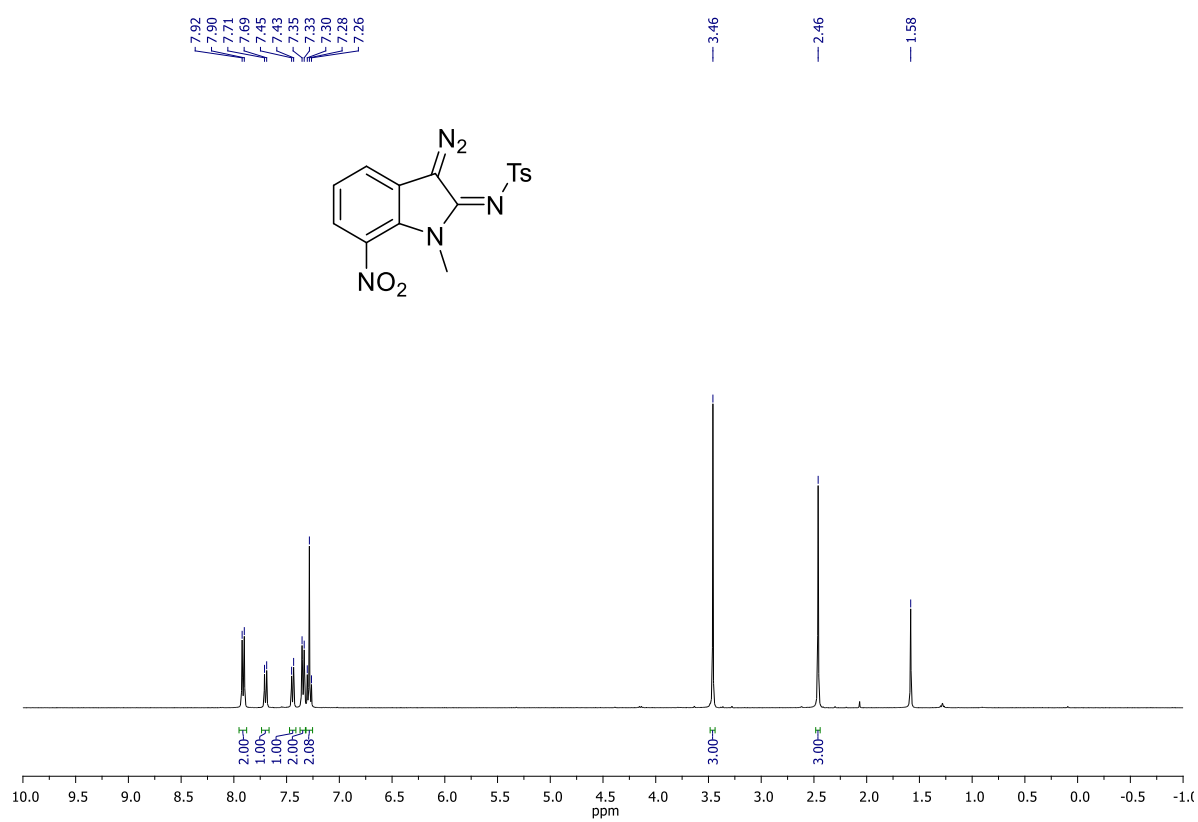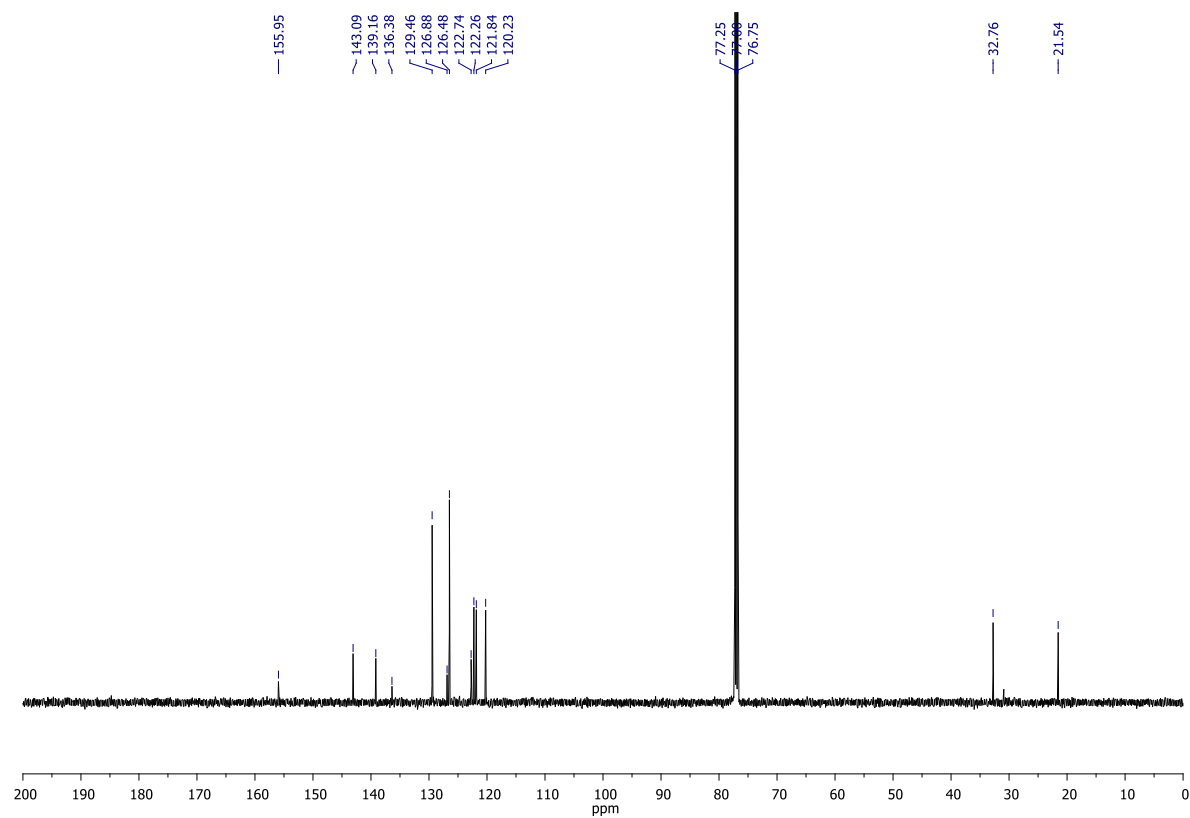

$^1\text{H}$  and  $^{13}\text{C}$  NMR spectra of compound **2i**

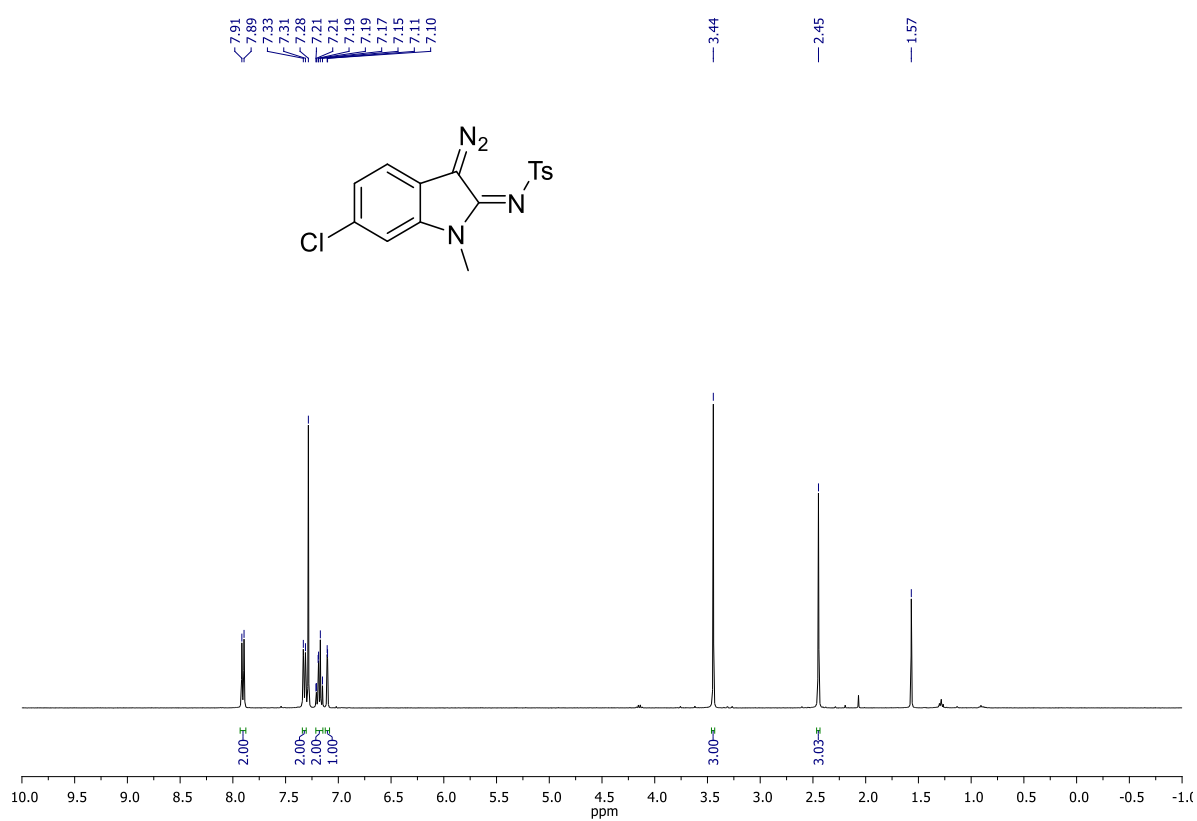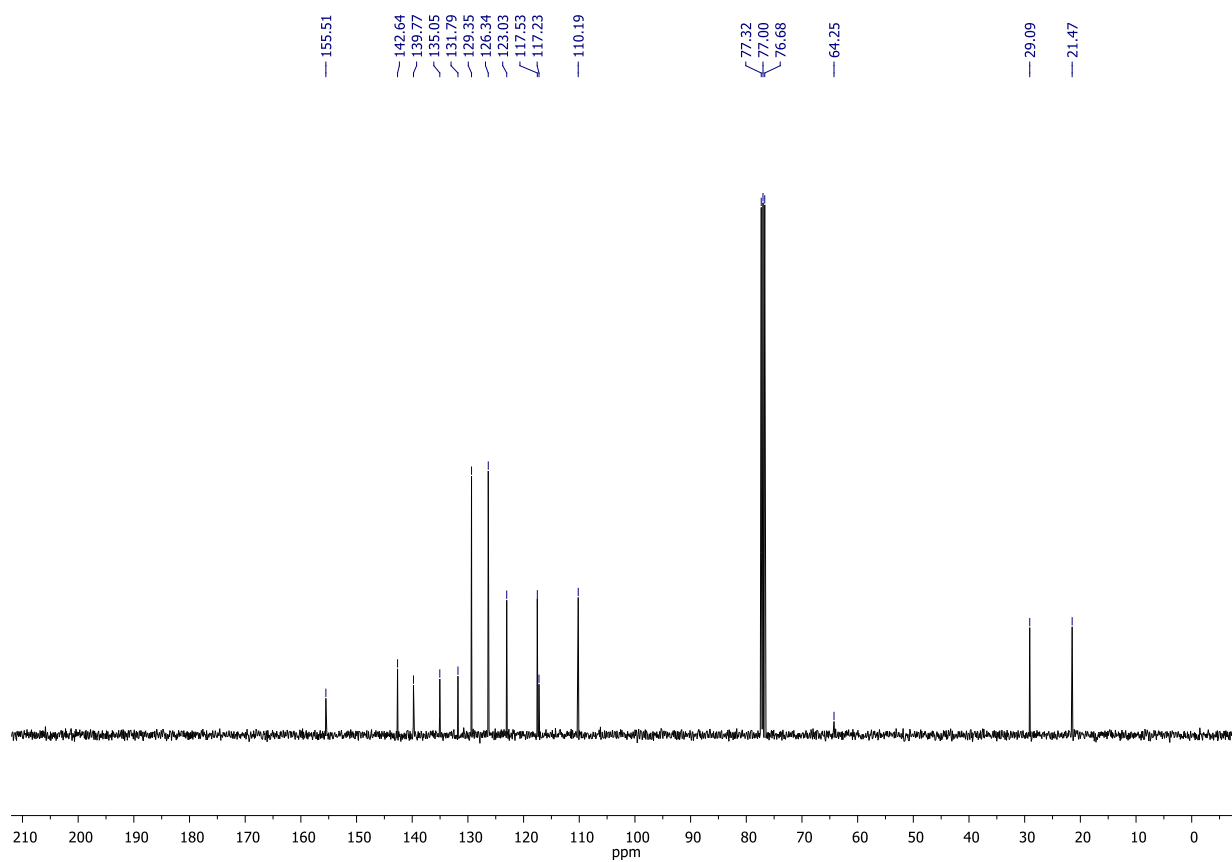

# $^1\text{H}$ and $^{13}\text{C}$ NMR spectra of compound **2j**

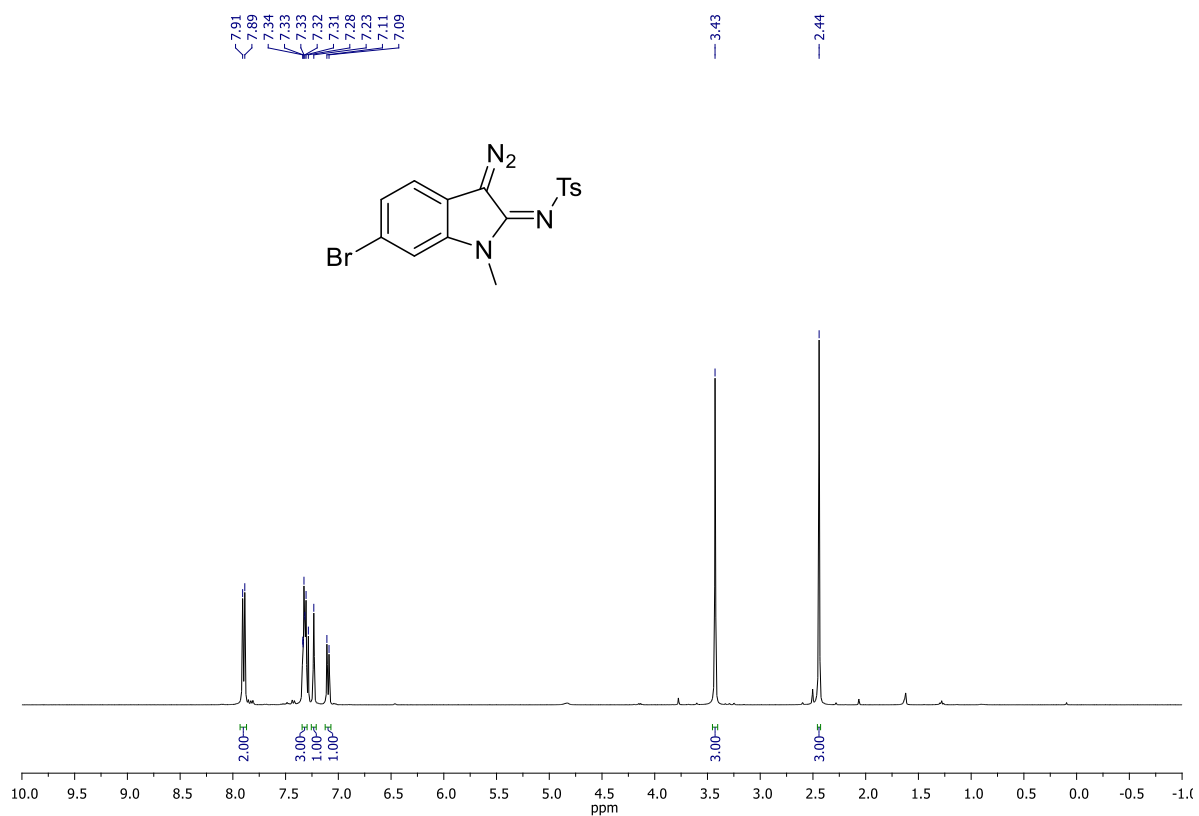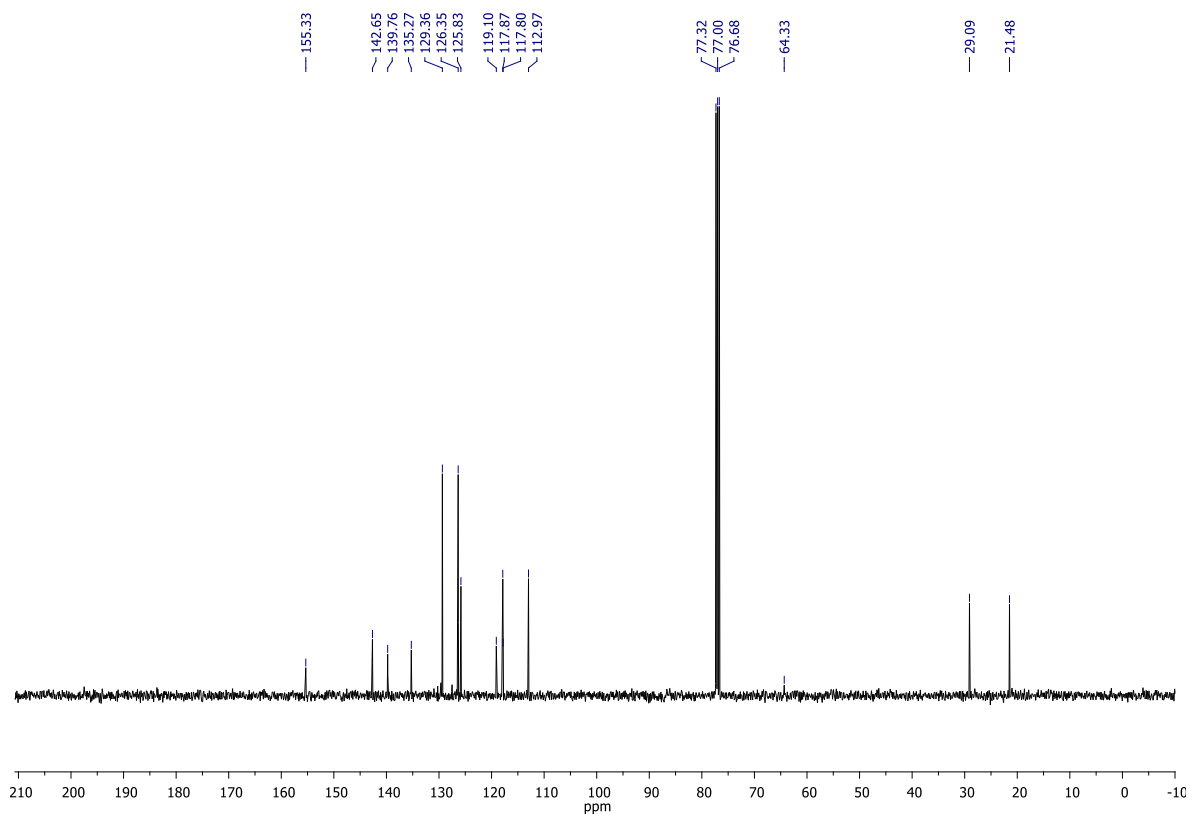

$^1\text{H}$  and  $^{13}\text{C}$  NMR spectra of compound **2n**

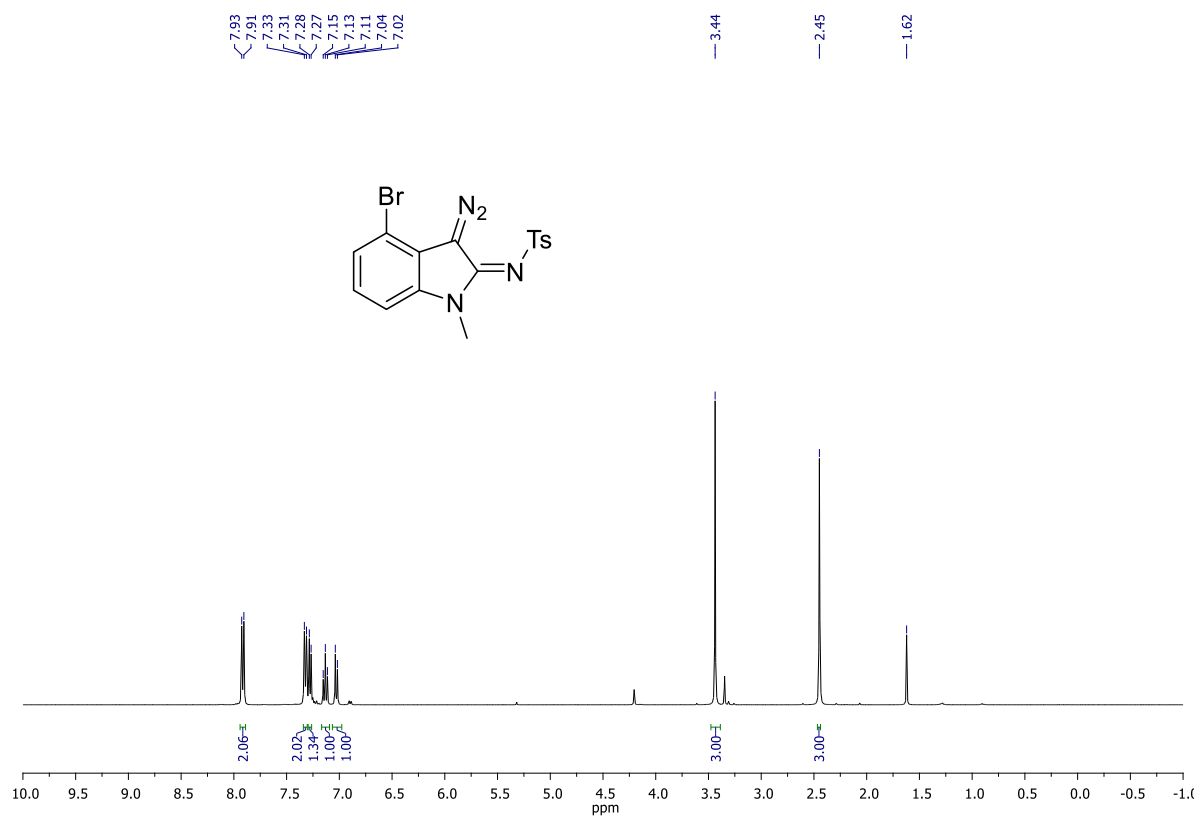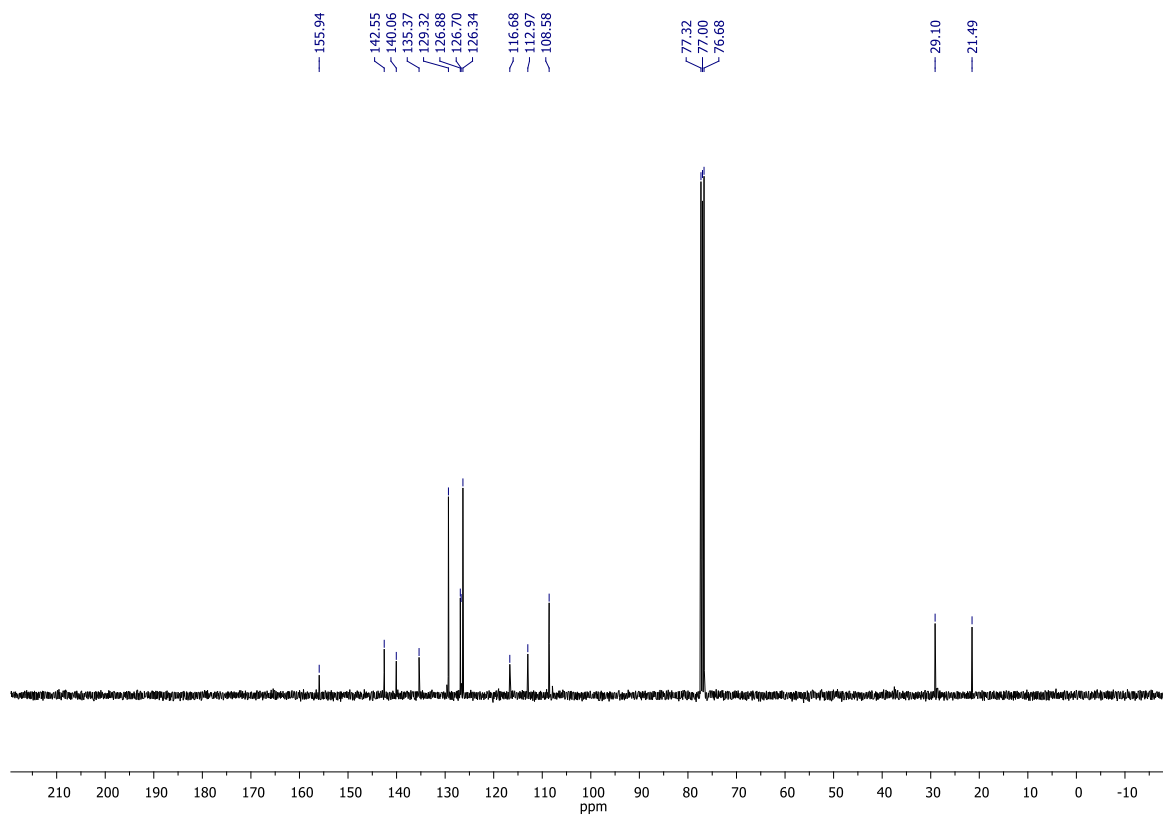

# $^1\text{H}$ and $^{13}\text{C}$ NMR spectra of compound **2o**

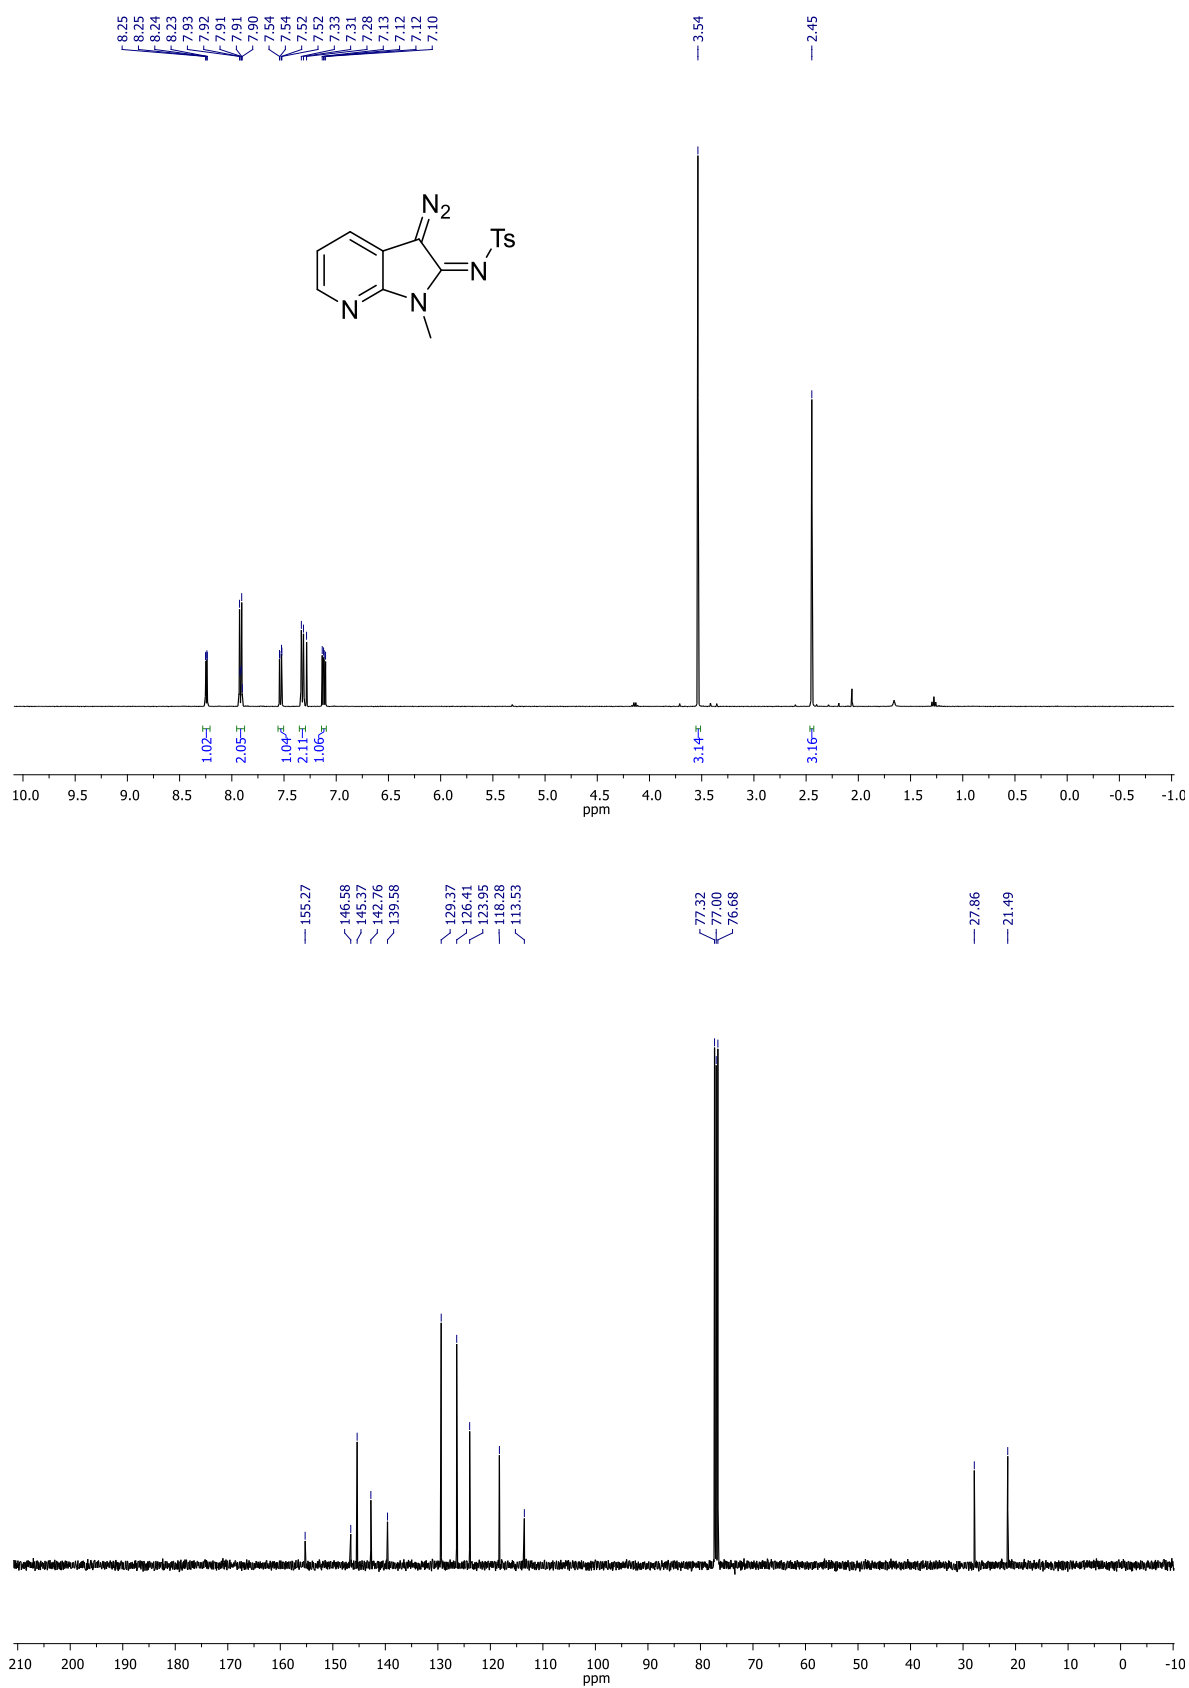

# $^1\text{H}$ and $^{13}\text{C}$ NMR spectra of azirines 3d,l

## $^1\text{H}$ and $^{13}\text{C}$ NMR spectra of compound 3d

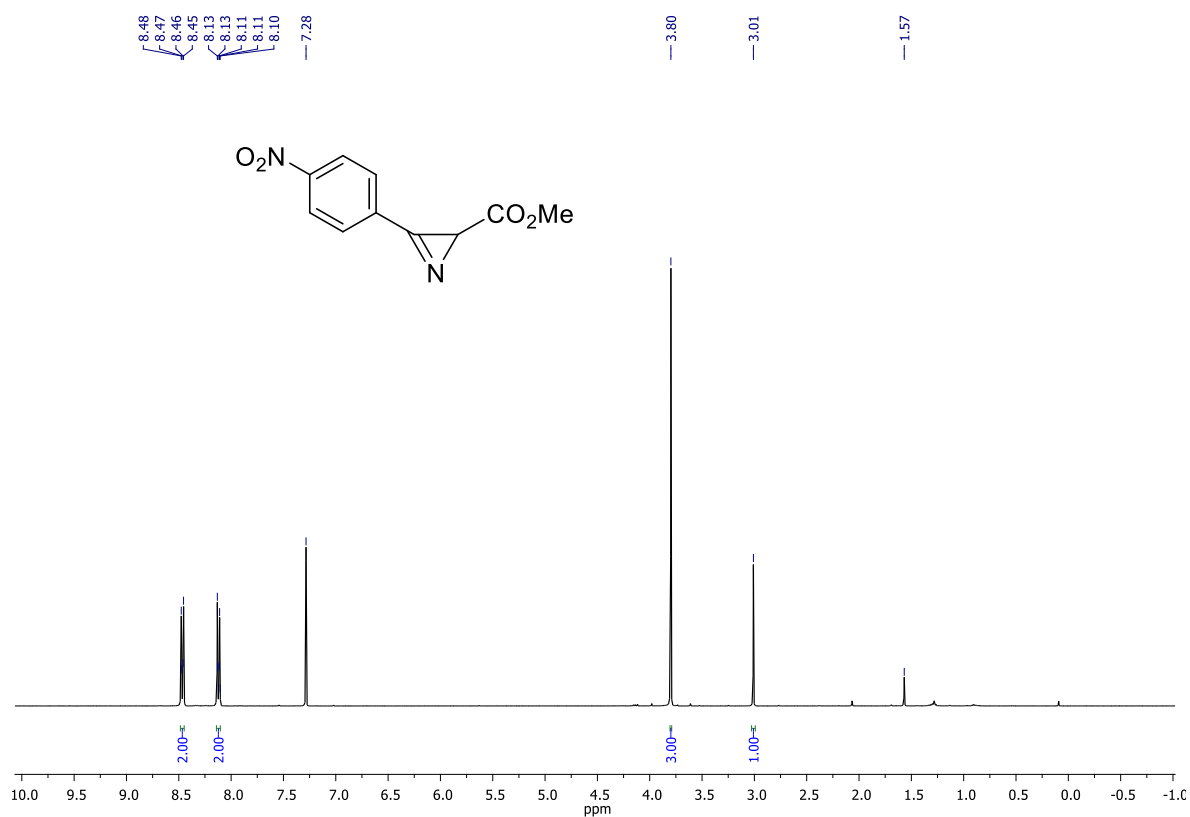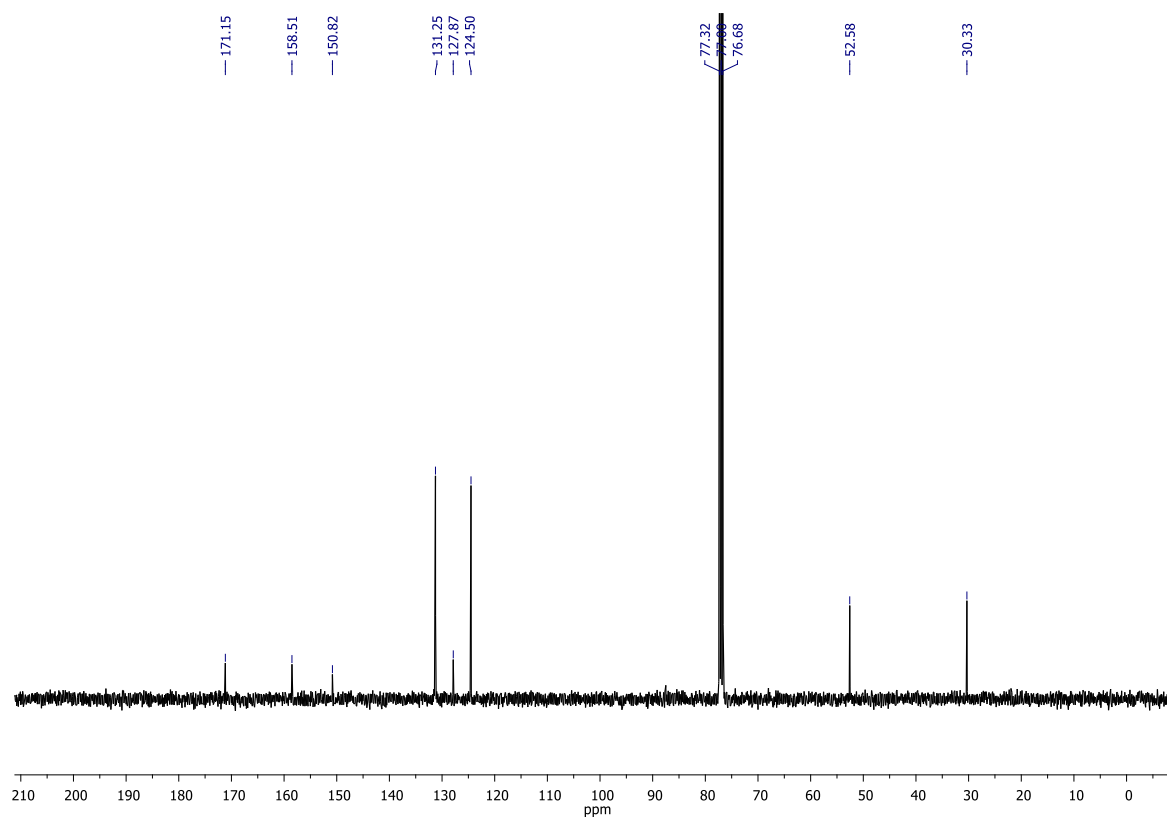

$^1\text{H}$  and  $^{13}\text{C}$  NMR spectra of compound **3l** (rotameric mixture ~ 1:1)

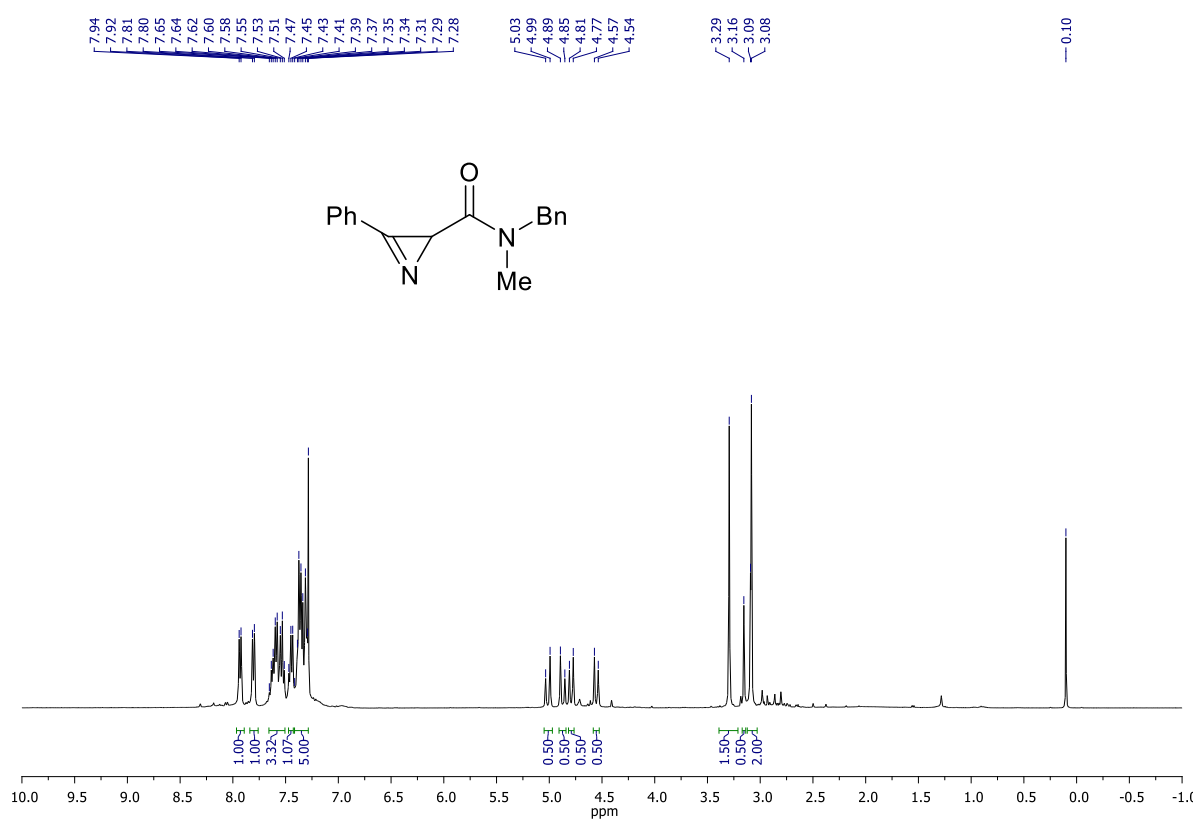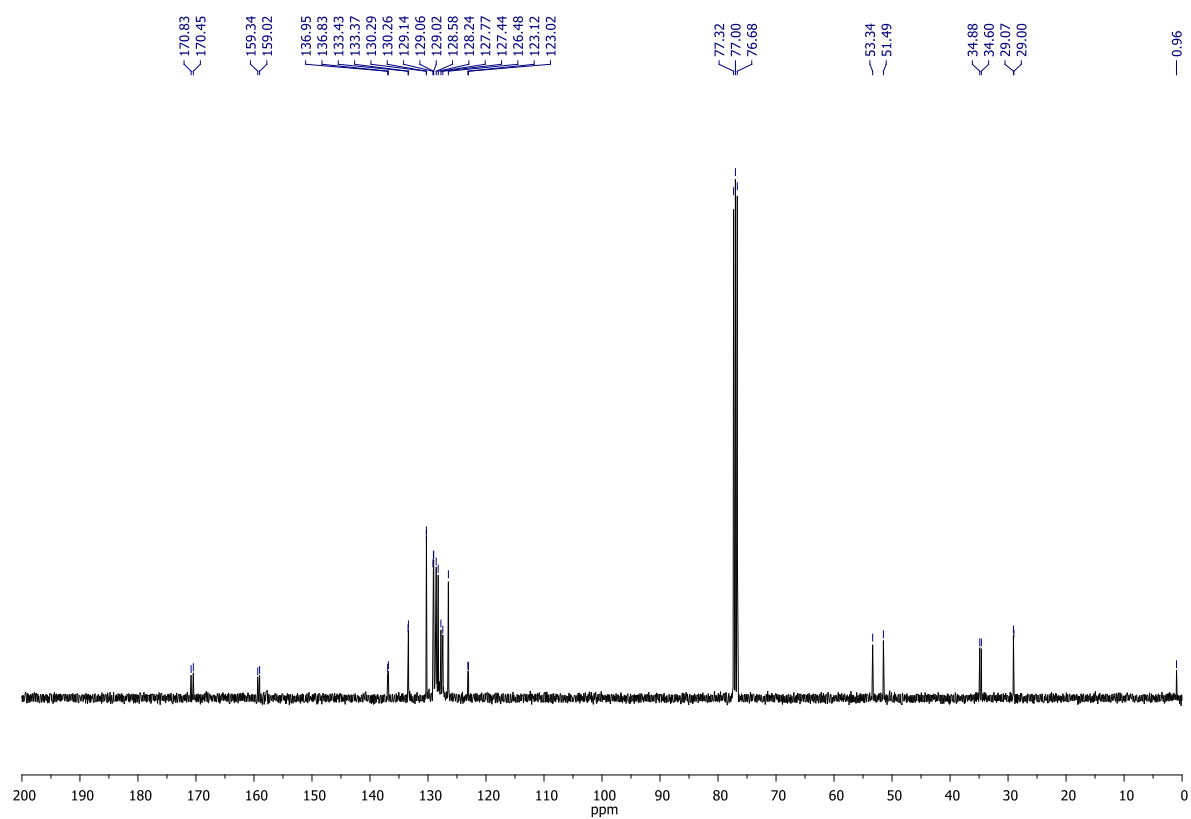



# $^1\text{H}$ and $^{13}\text{C}$ NMR spectra of 5*H*-pyrazino[2,3-*b*]indoles 4

## $^1\text{H}$ and $^{13}\text{C}$ NMR spectra of compound 4a

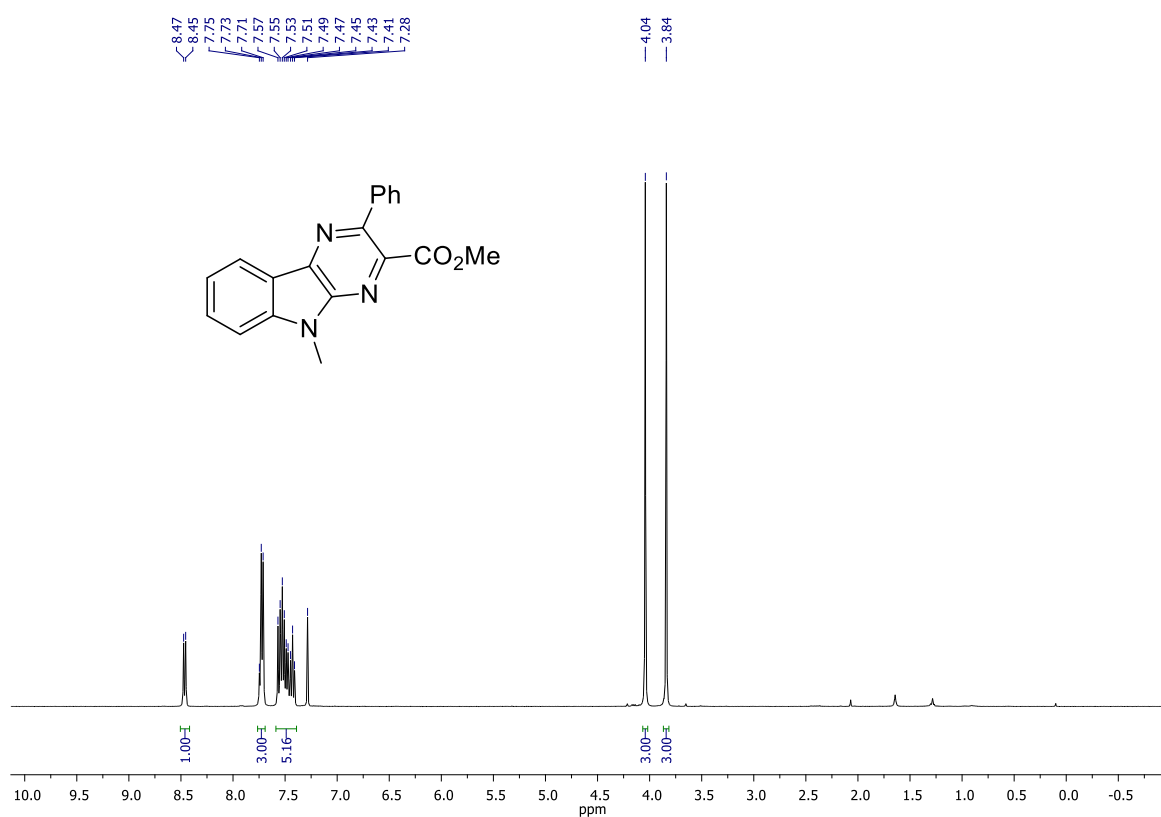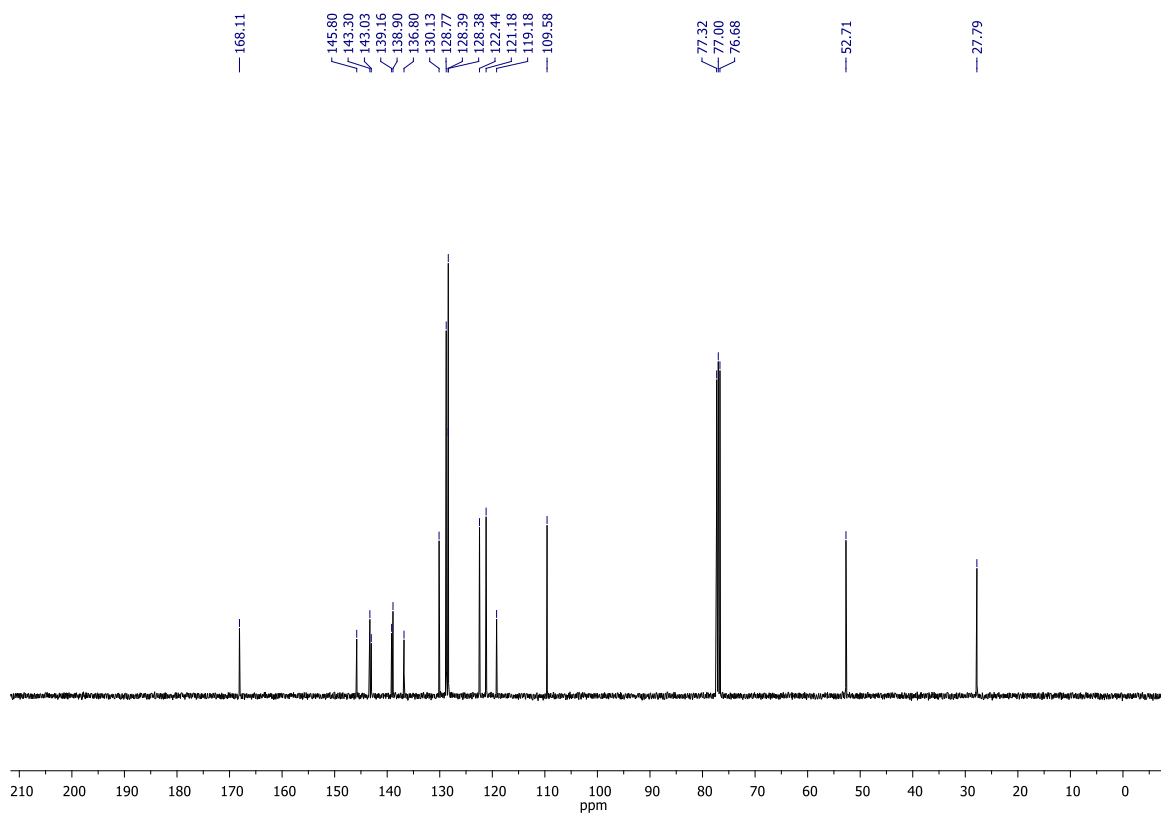

# $^1\text{H}$ and $^{13}\text{C}$ NMR spectra of compound **4b**

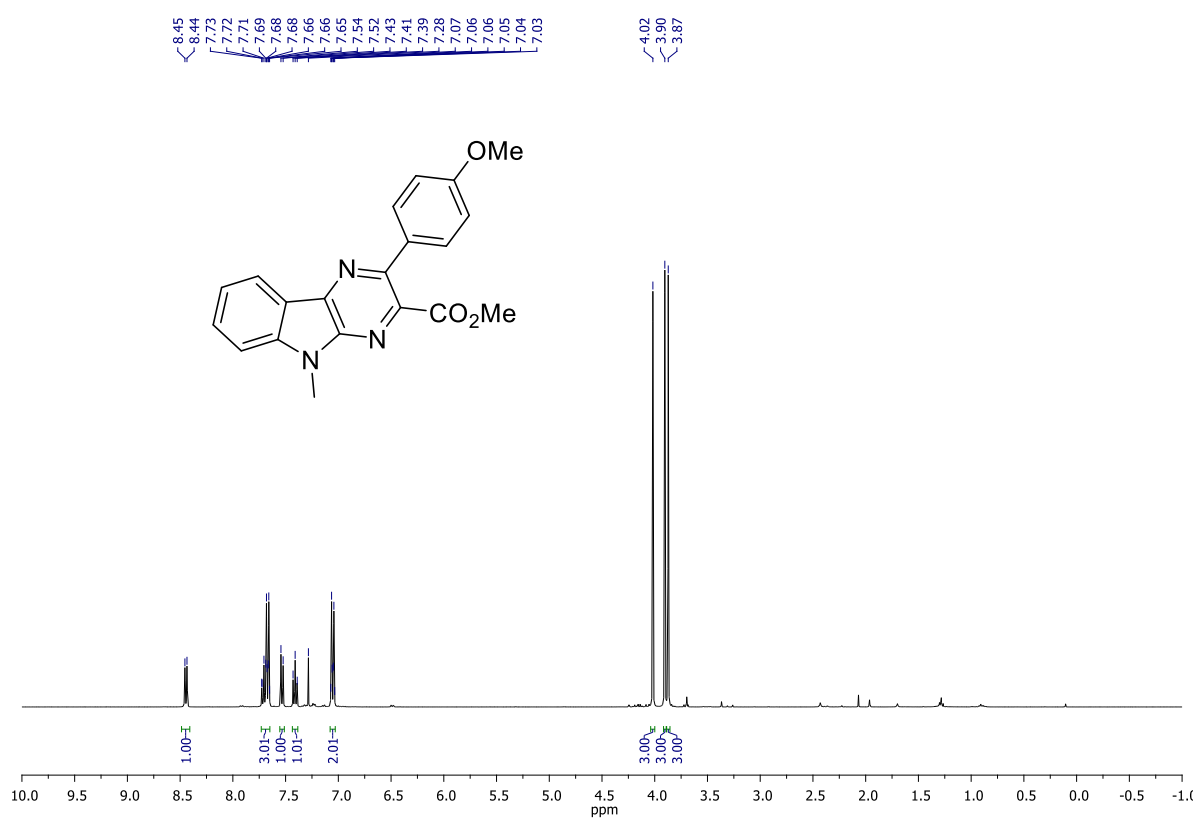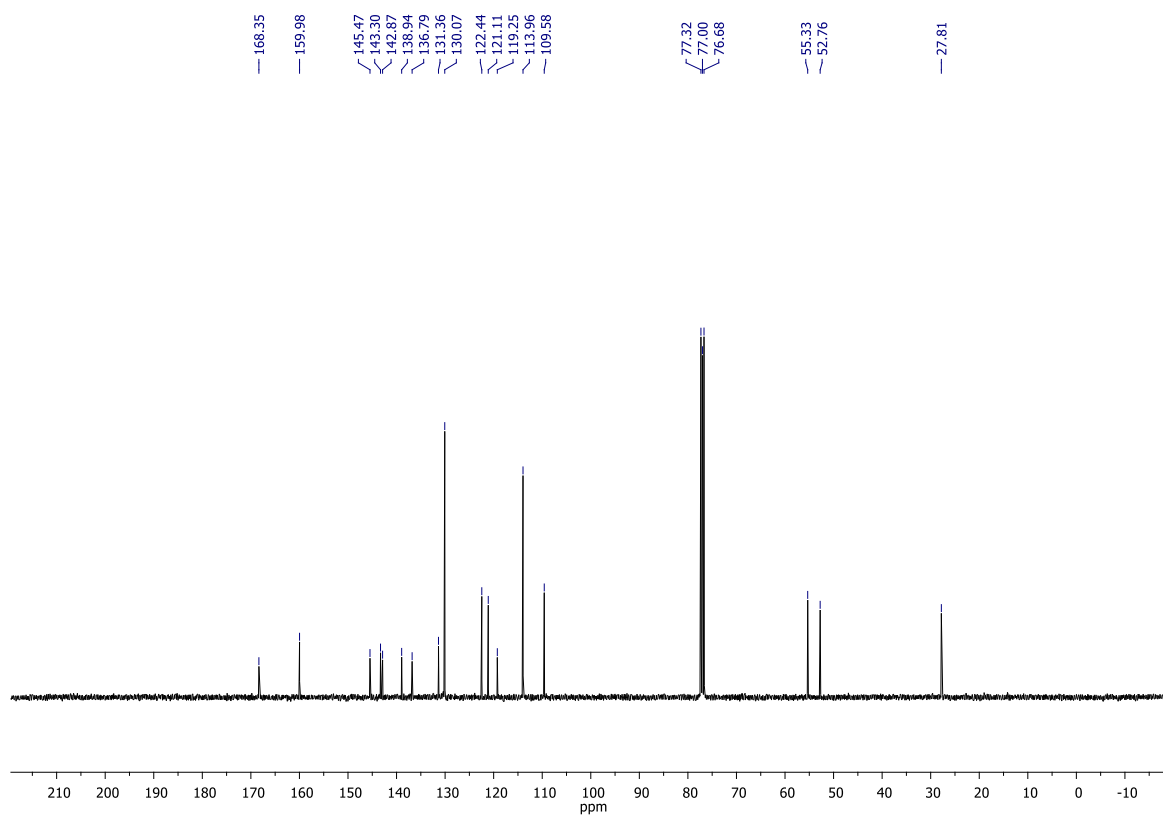

# $^1\text{H}$ and $^{13}\text{C}$ NMR spectra of compound **4c**

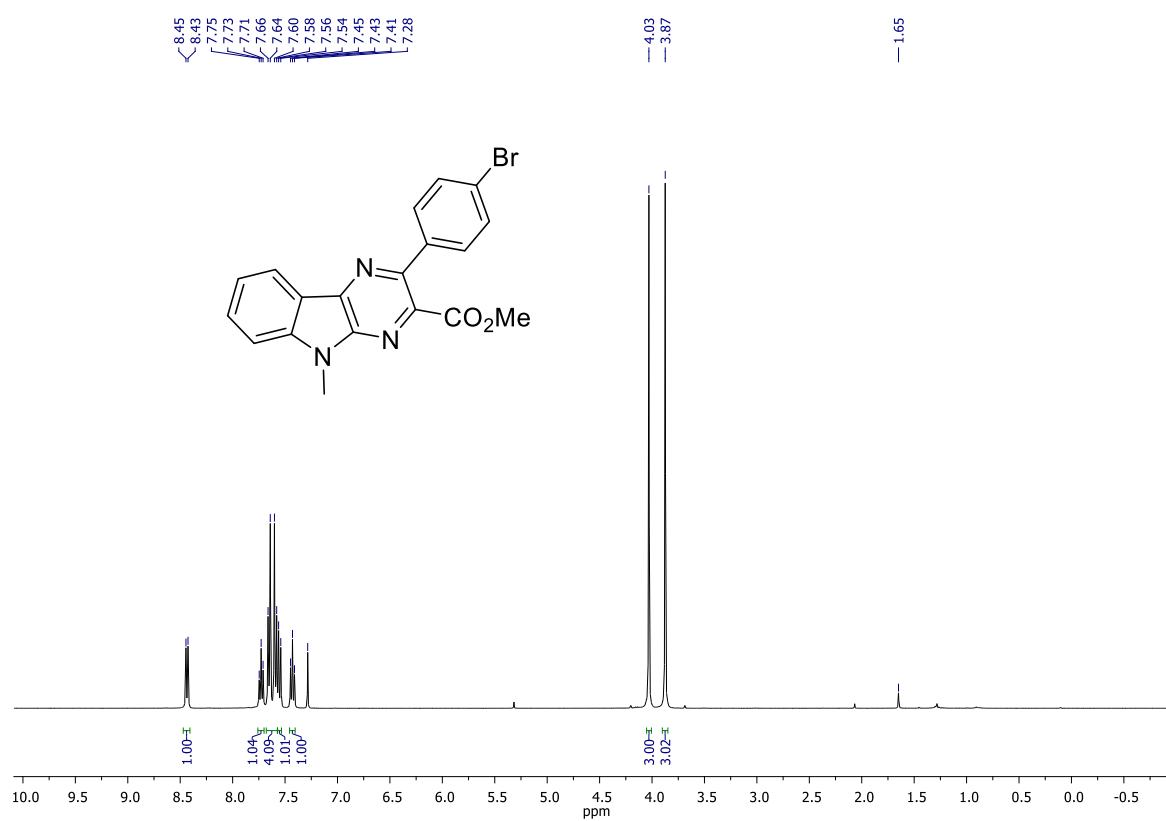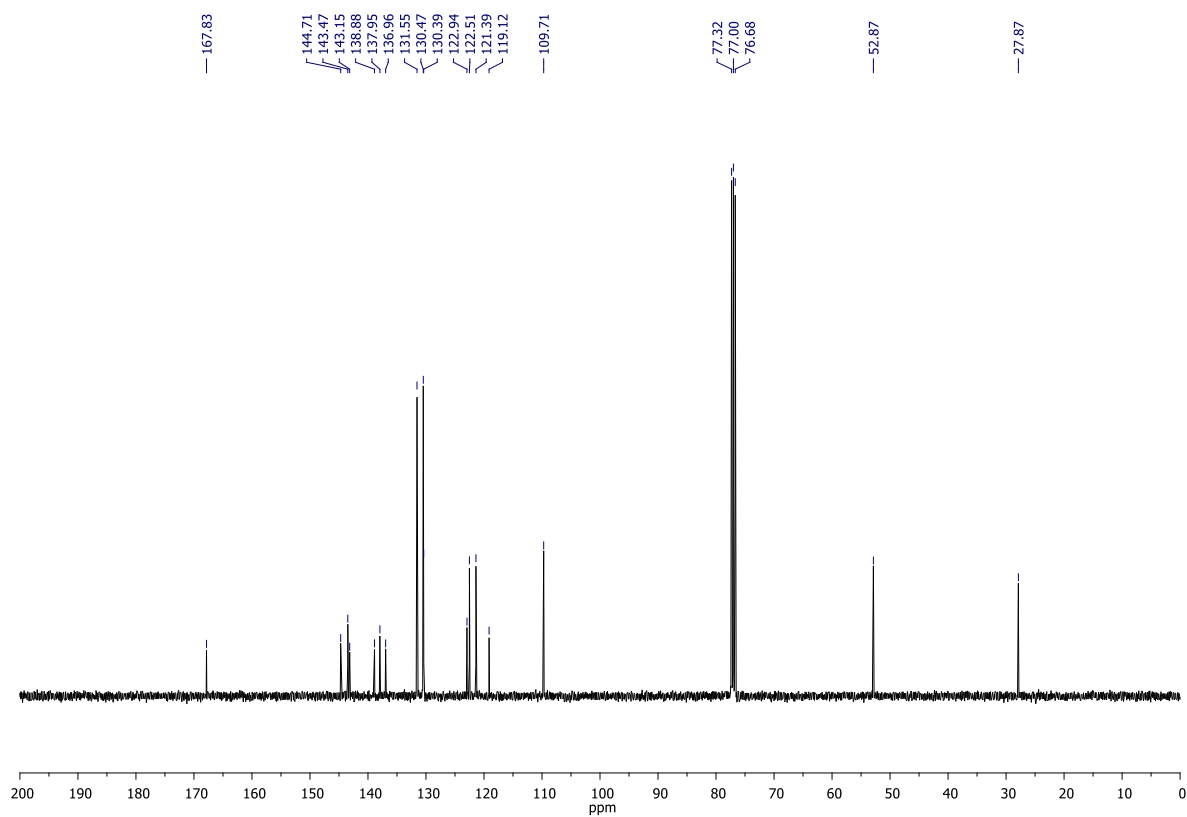

$^1\text{H}$  and  $^{13}\text{C}$  NMR spectra of compound **4d**

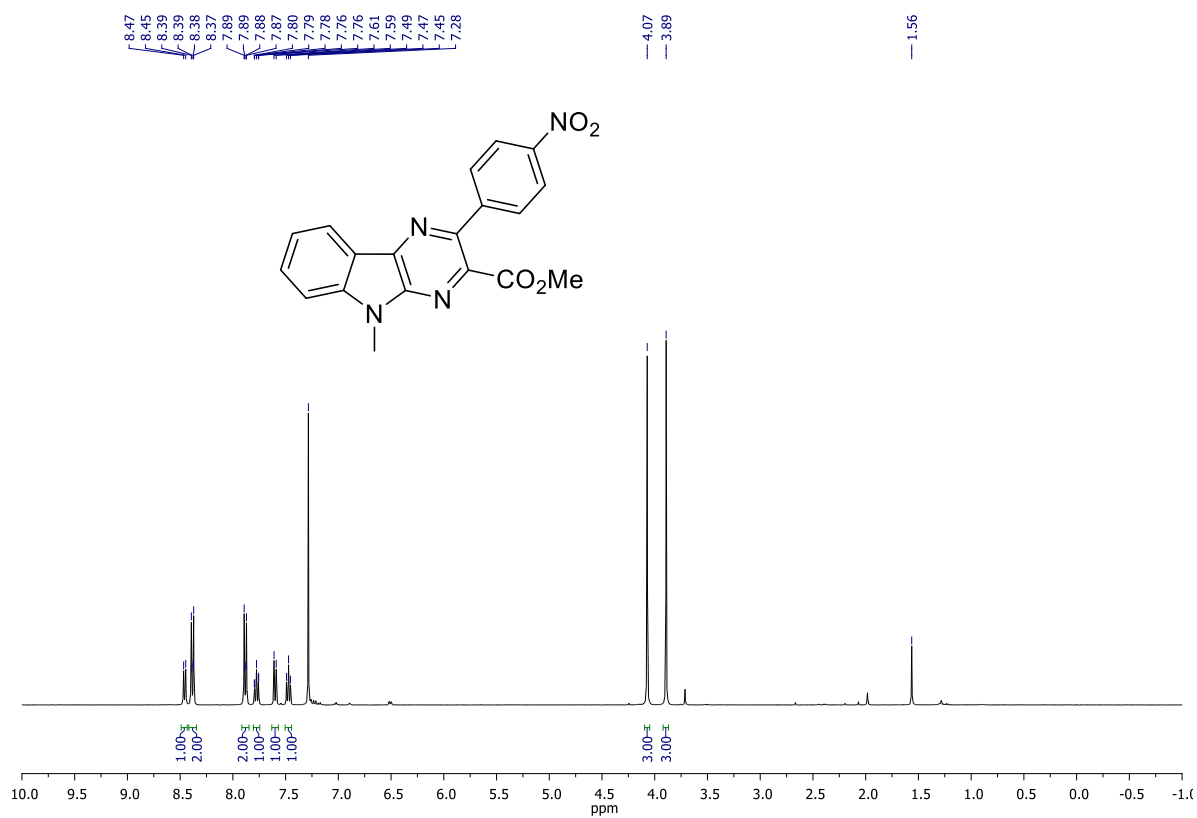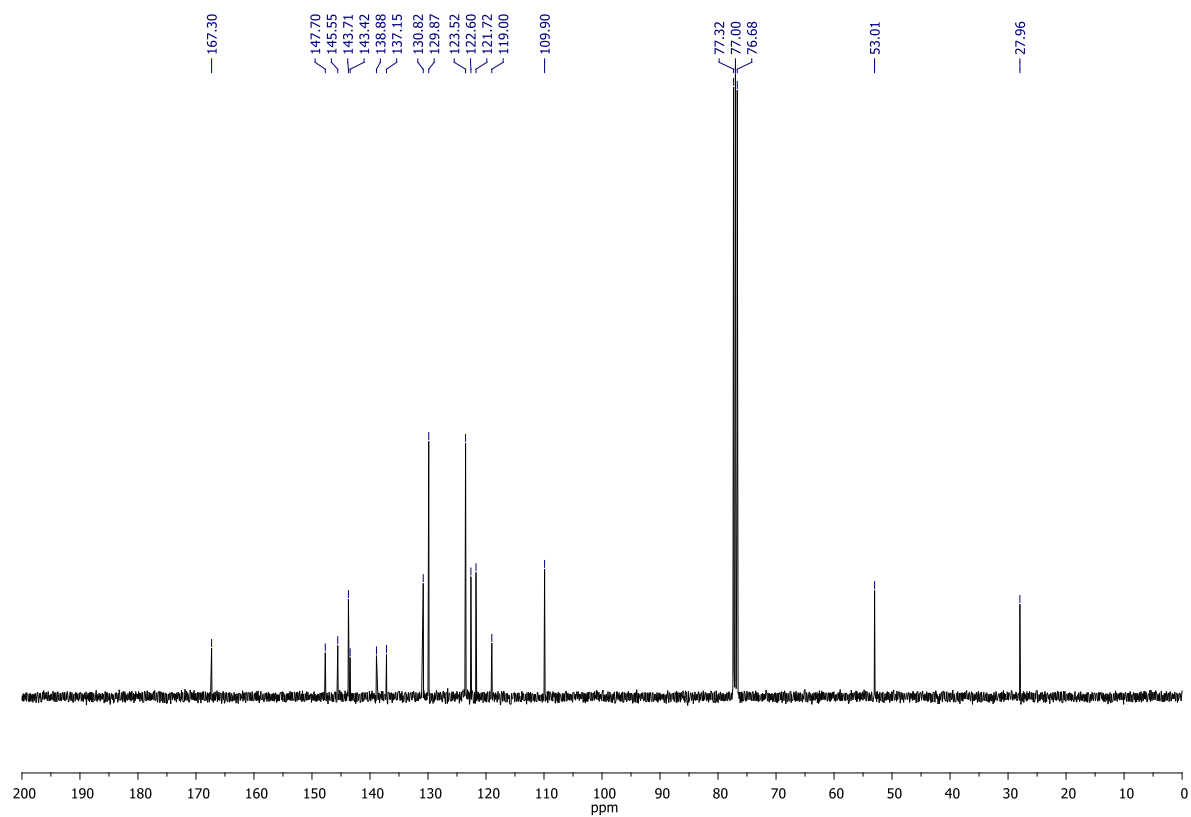

# $^1\text{H}$ and $^{13}\text{C}$ NMR spectra of compound **4e**

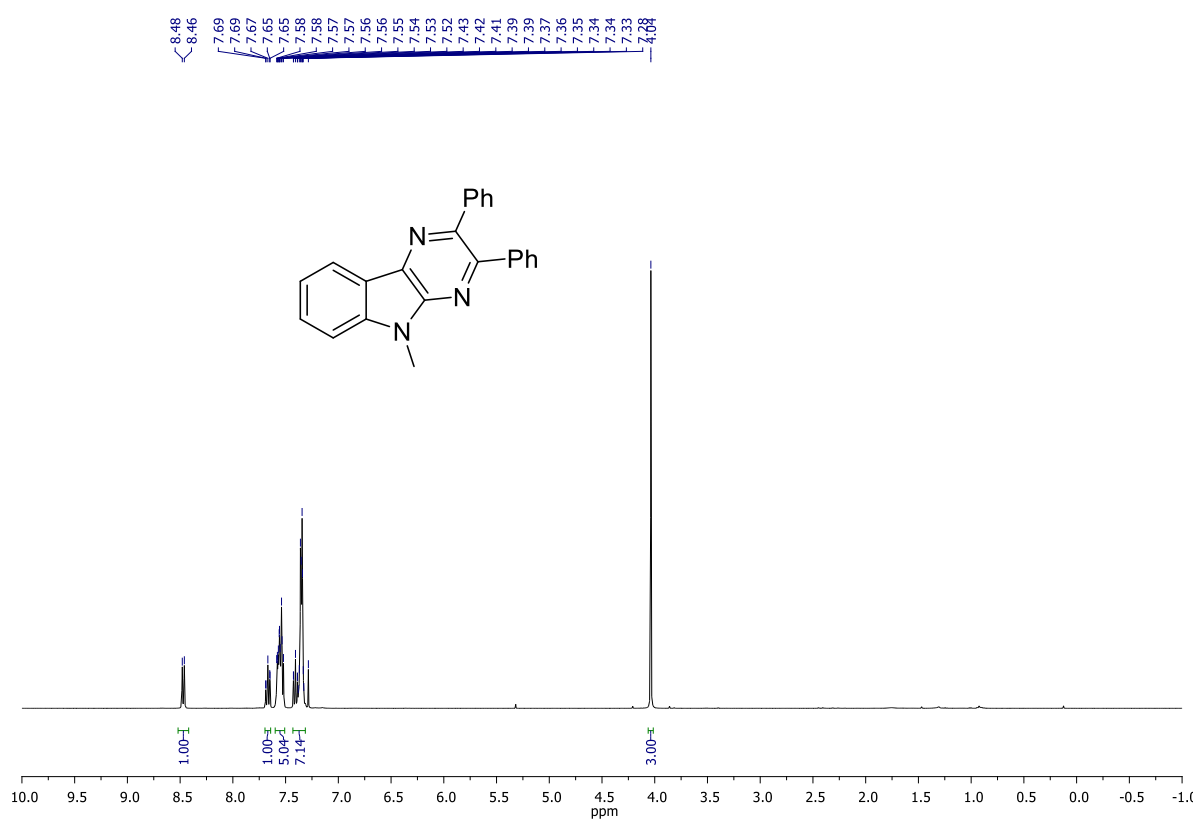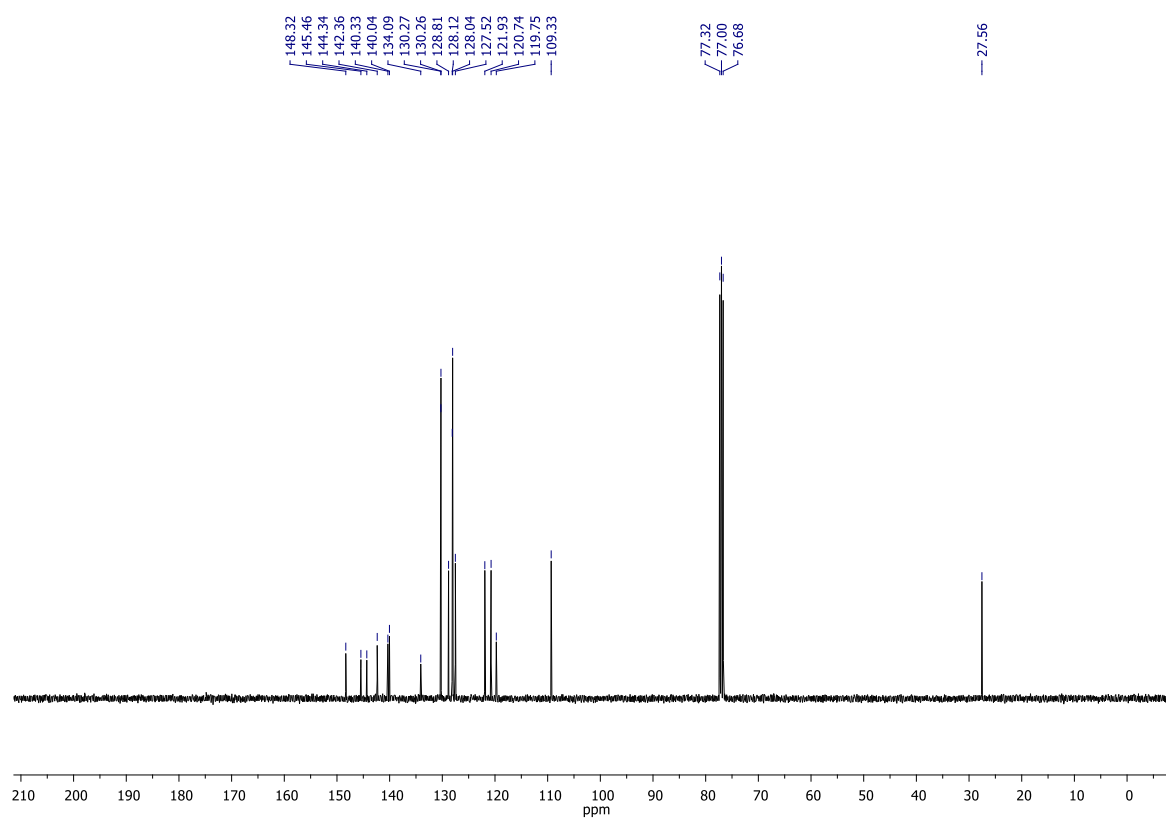

# $^1\text{H}$ and $^{13}\text{C}$ NMR spectra of compound **4f**

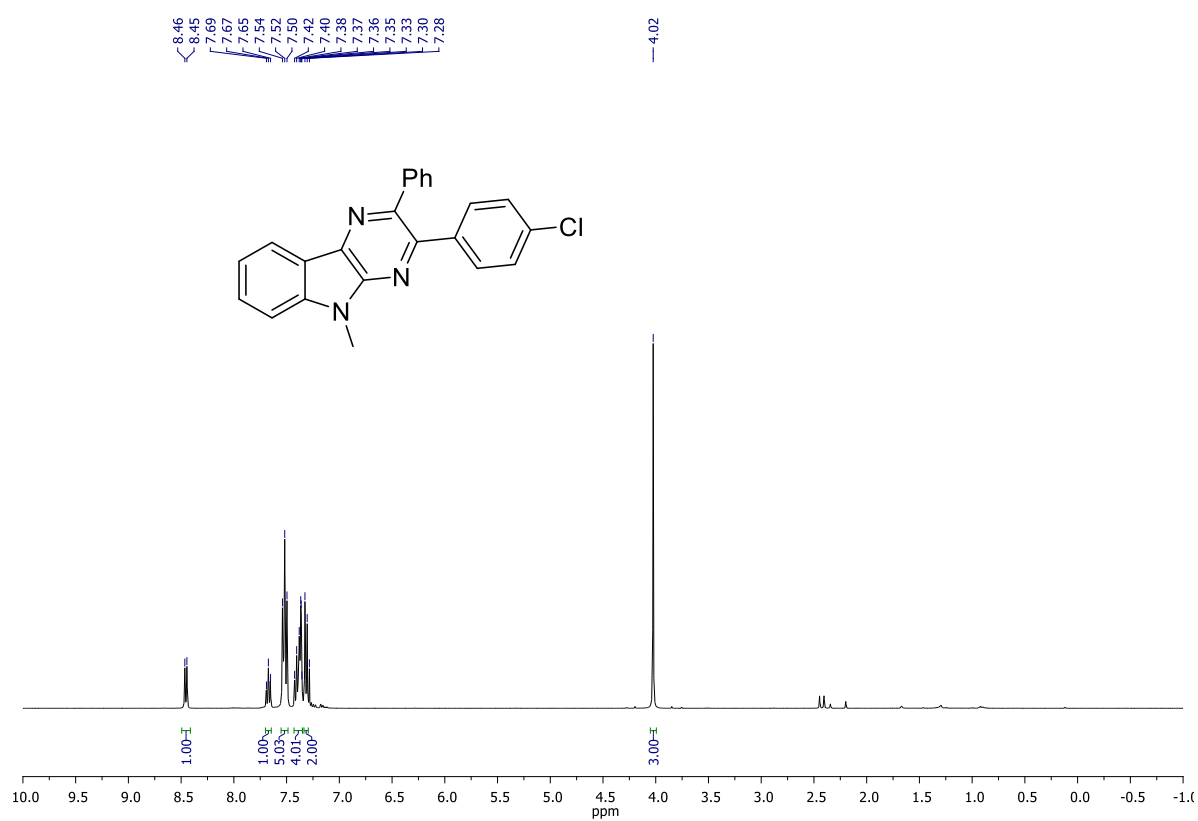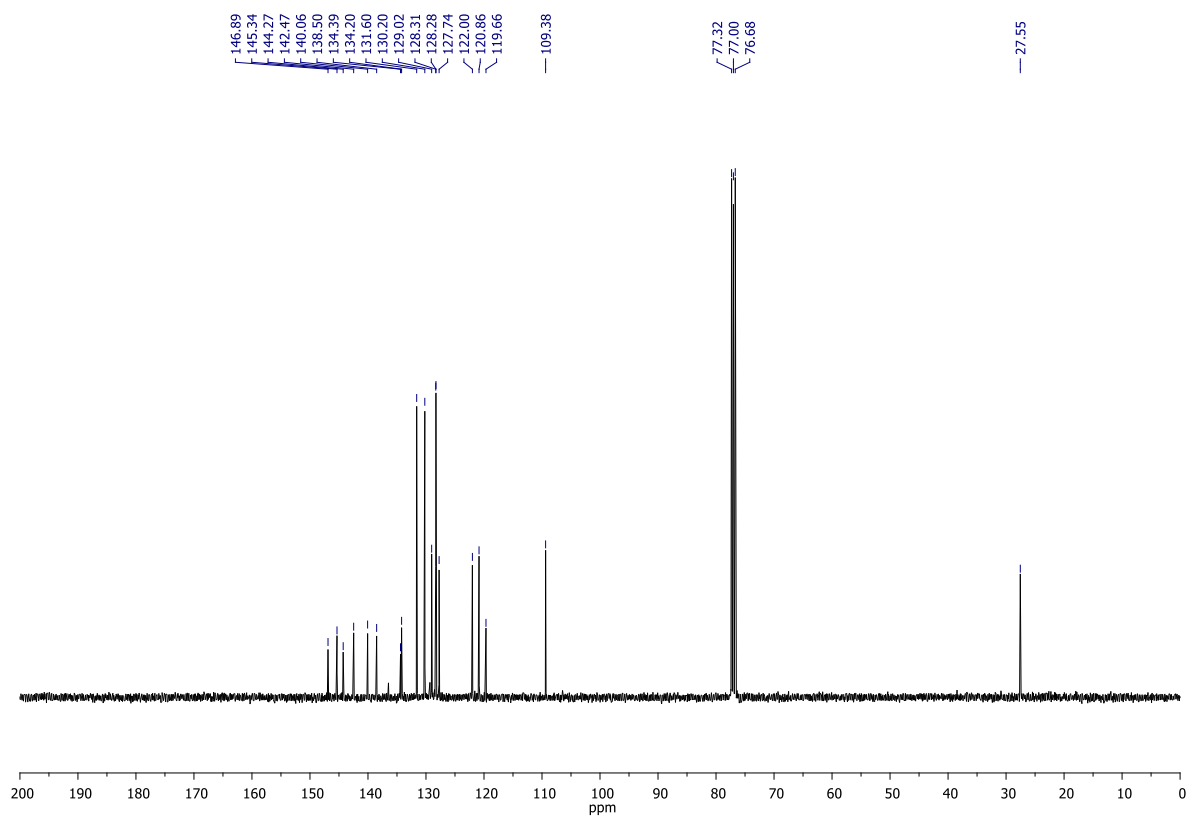

# $^1\text{H}$ and $^{13}\text{C}$ NMR spectra of compound **4g**

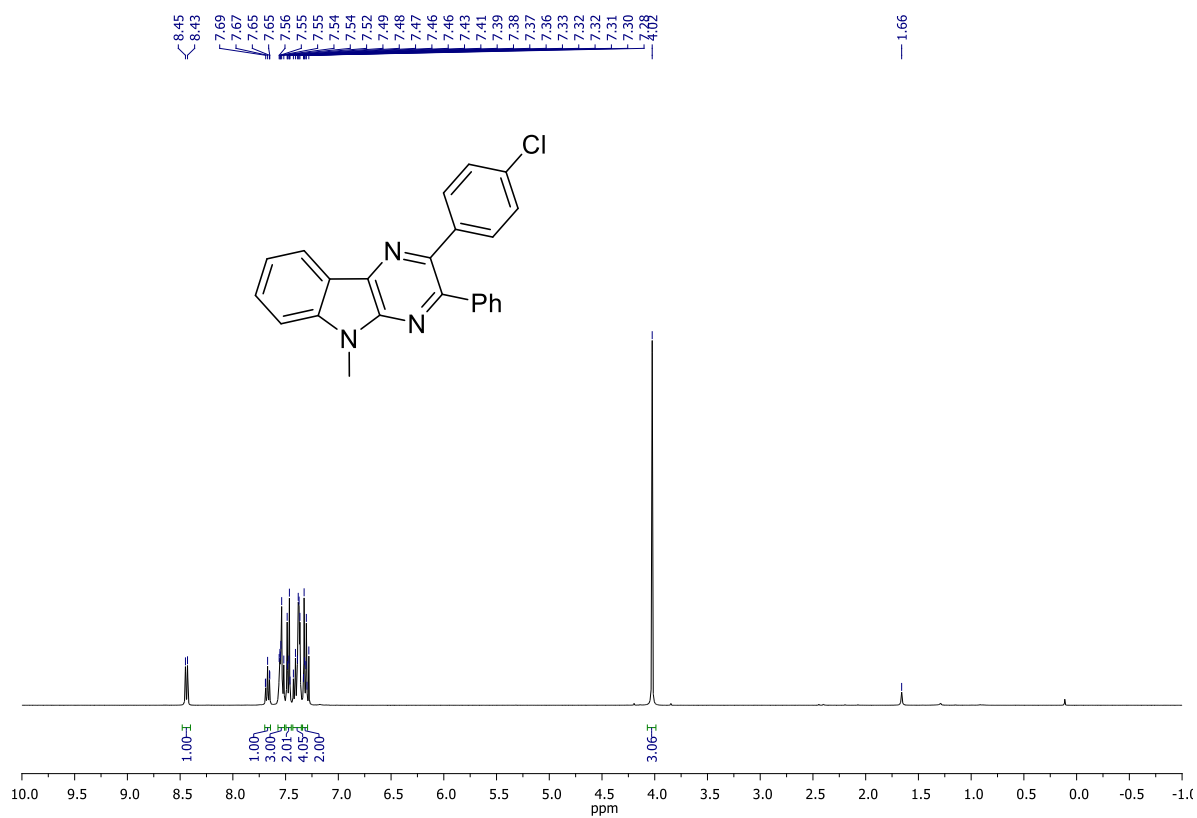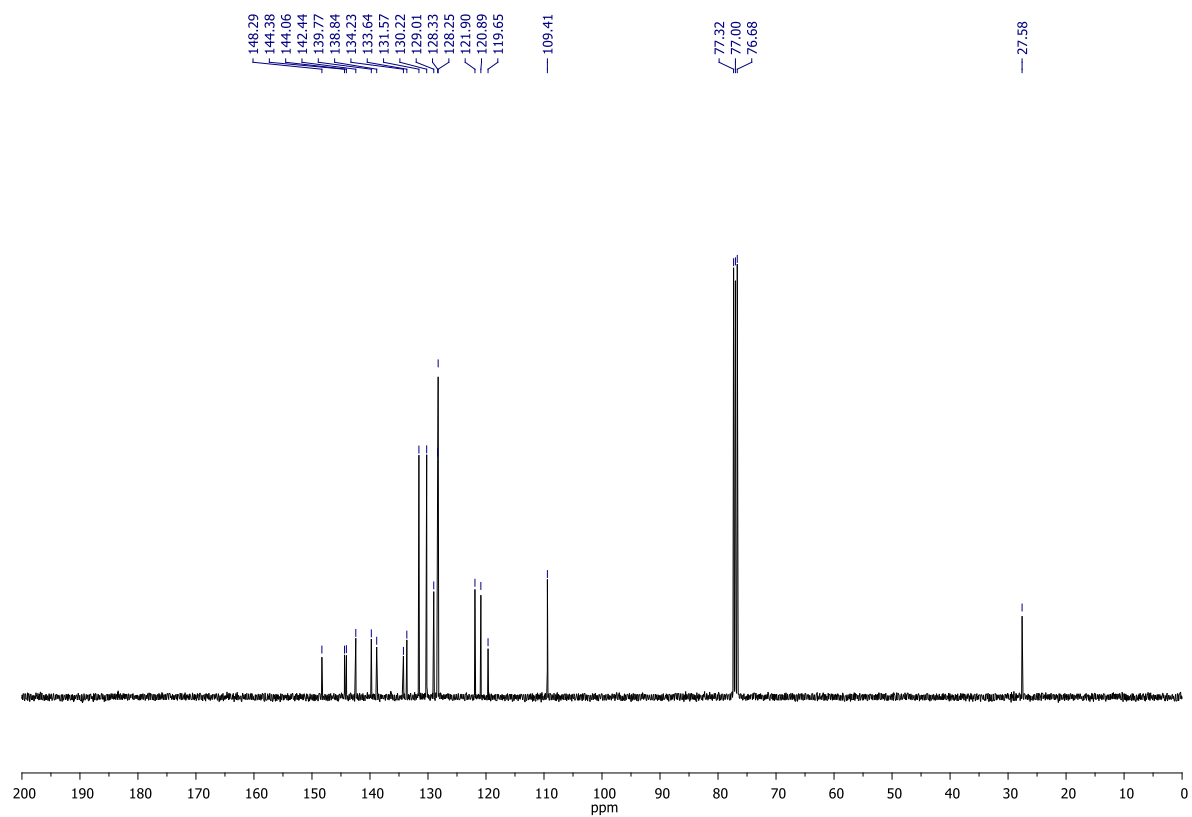

$^1\text{H}$  and  $^{13}\text{C}$  NMR spectra of compound **4h**

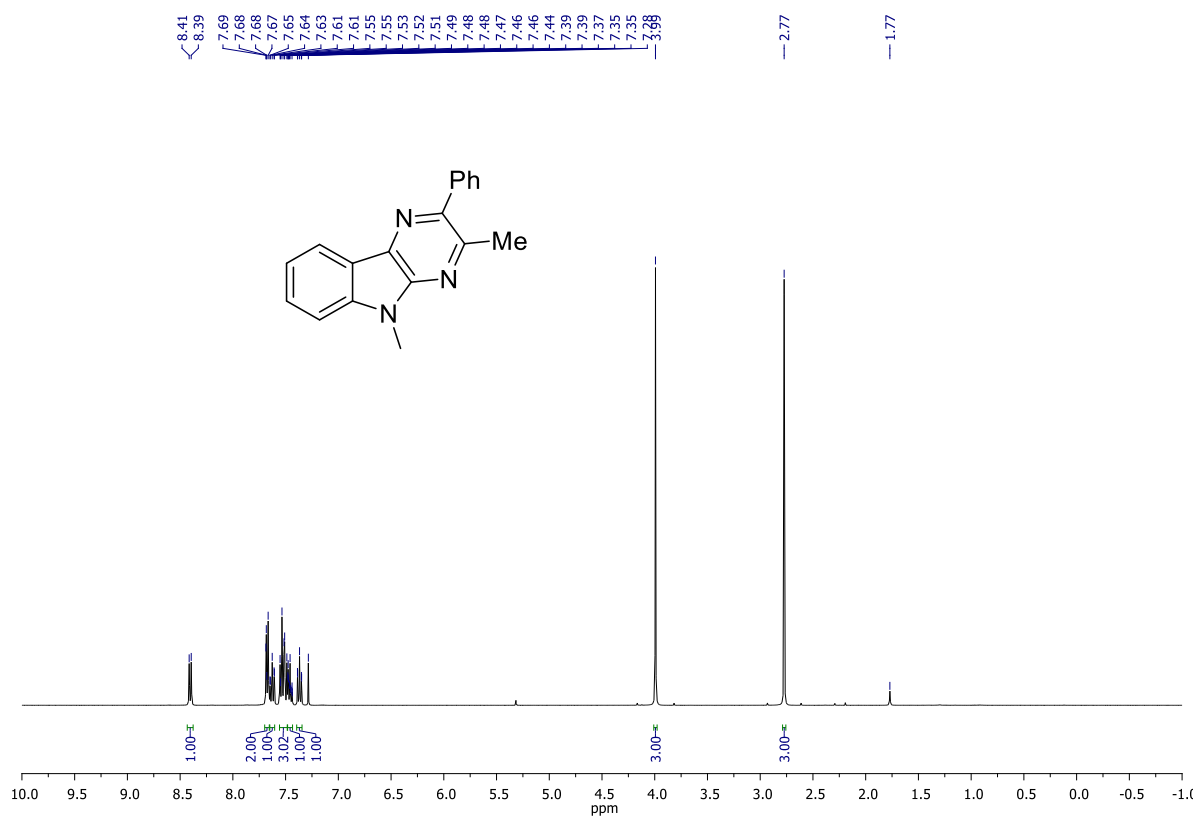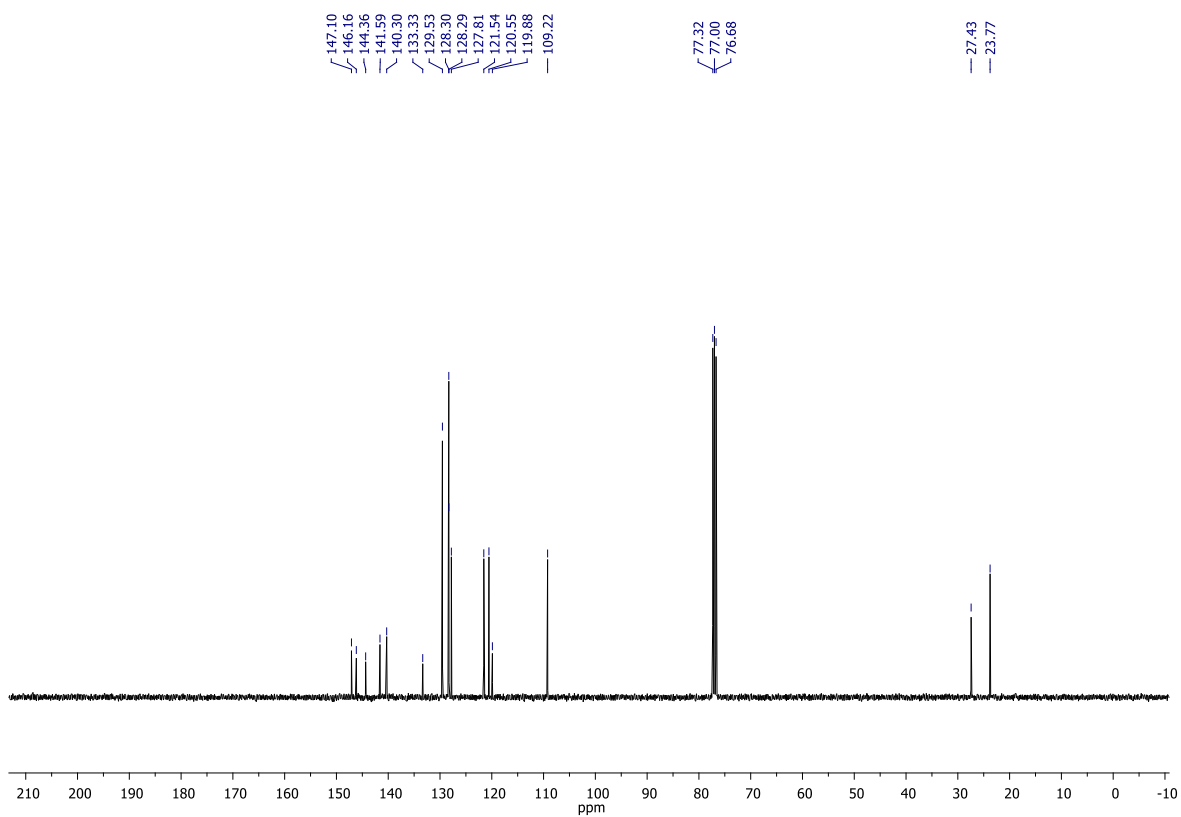



# $^1\text{H}$ and $^{13}\text{C}$ NMR spectra of compound **4i**

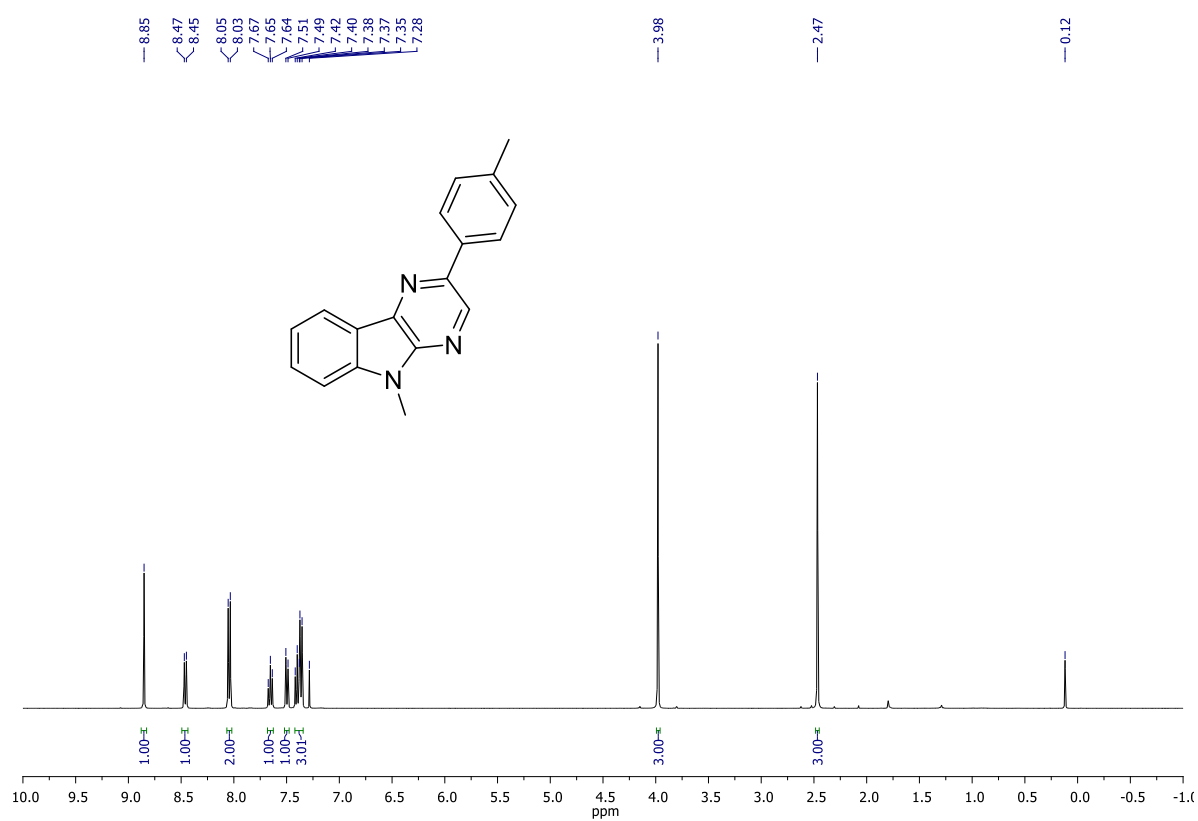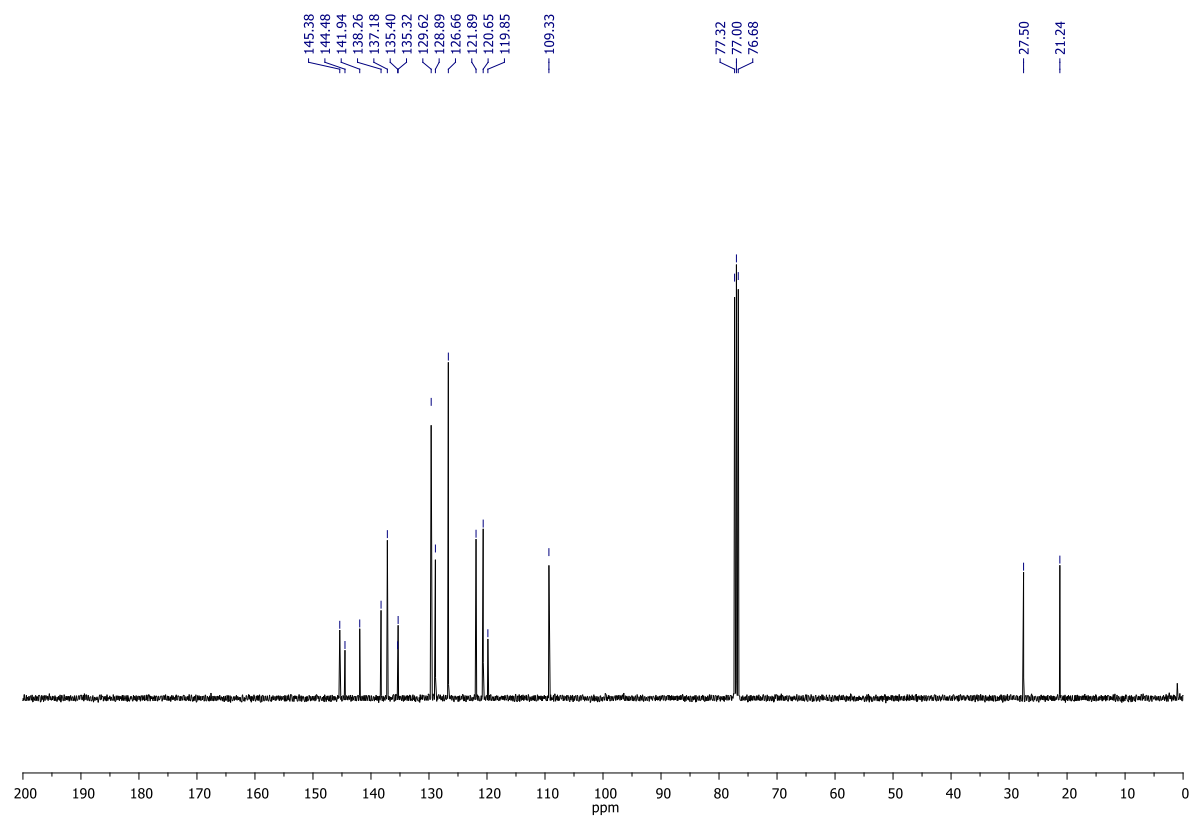

# $^1\text{H}$ and $^{13}\text{C}$ NMR spectra of compound **4j**

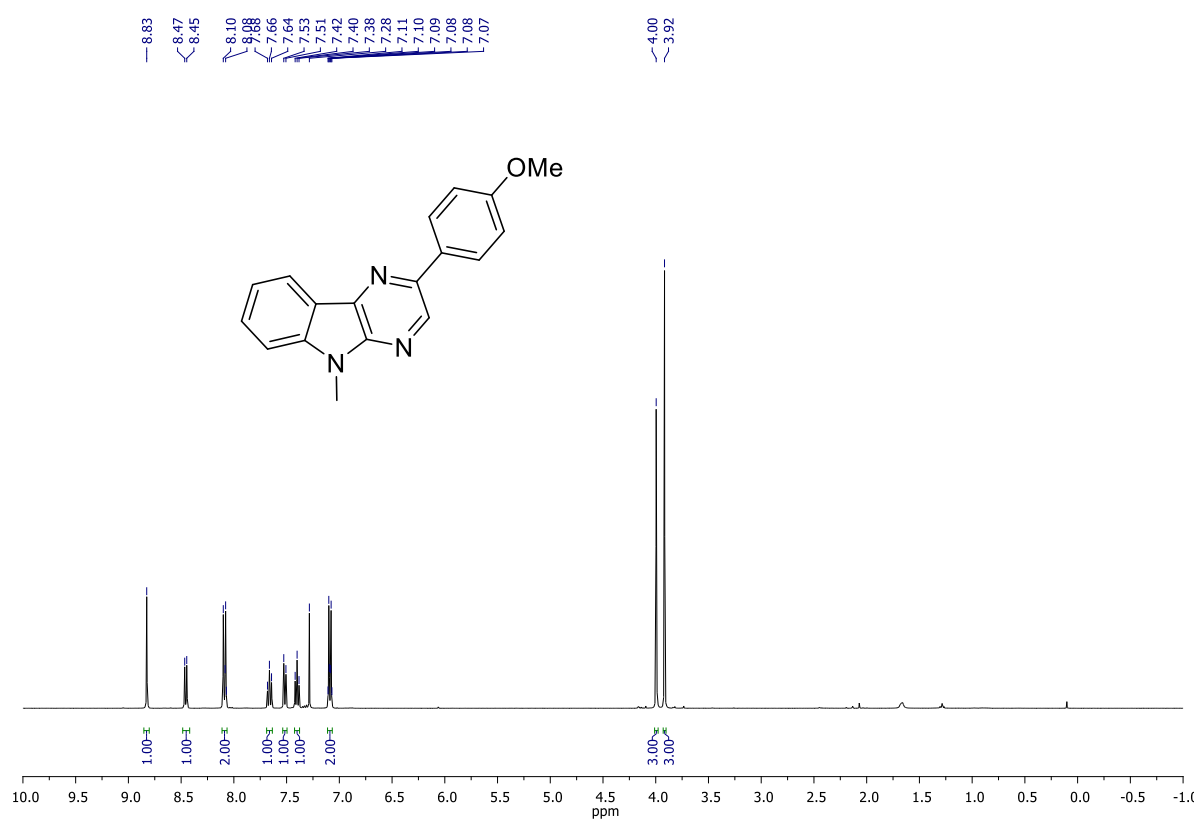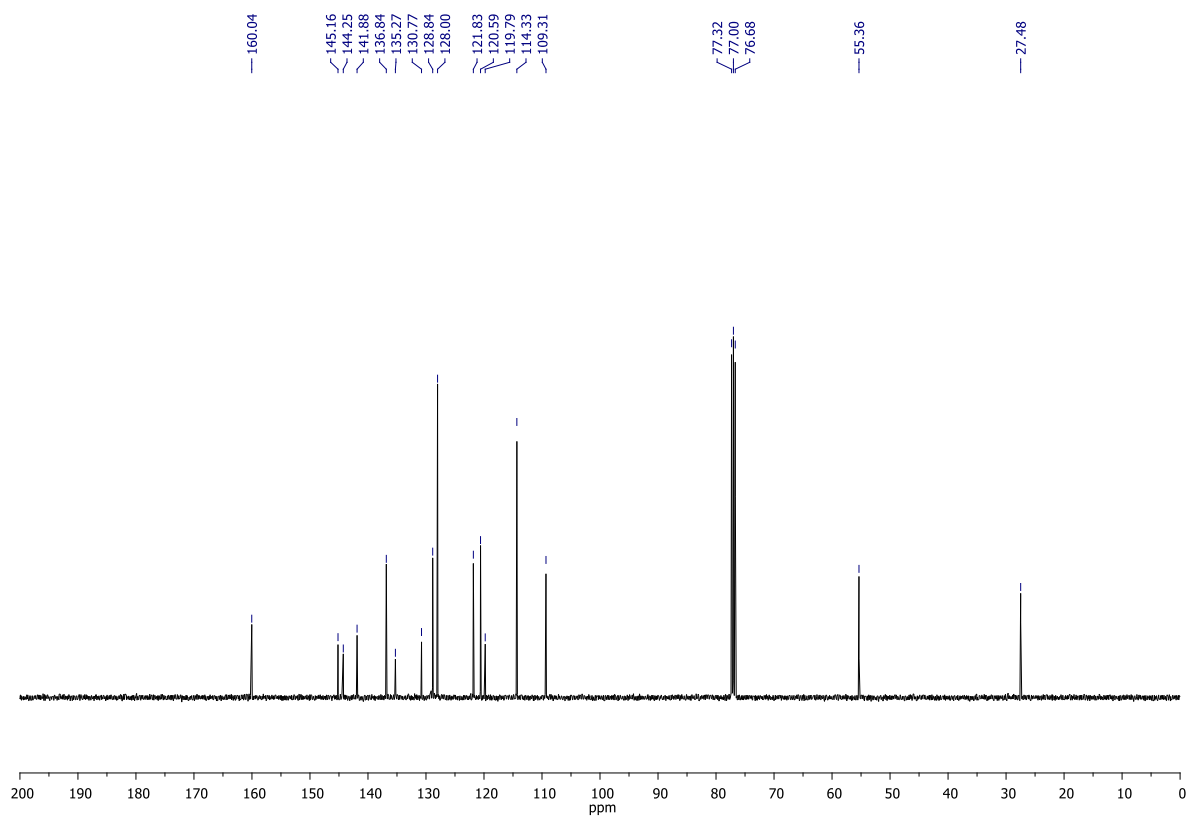

$^1\text{H}$  and  $^{13}\text{C}$  NMR spectra of compound **4k**

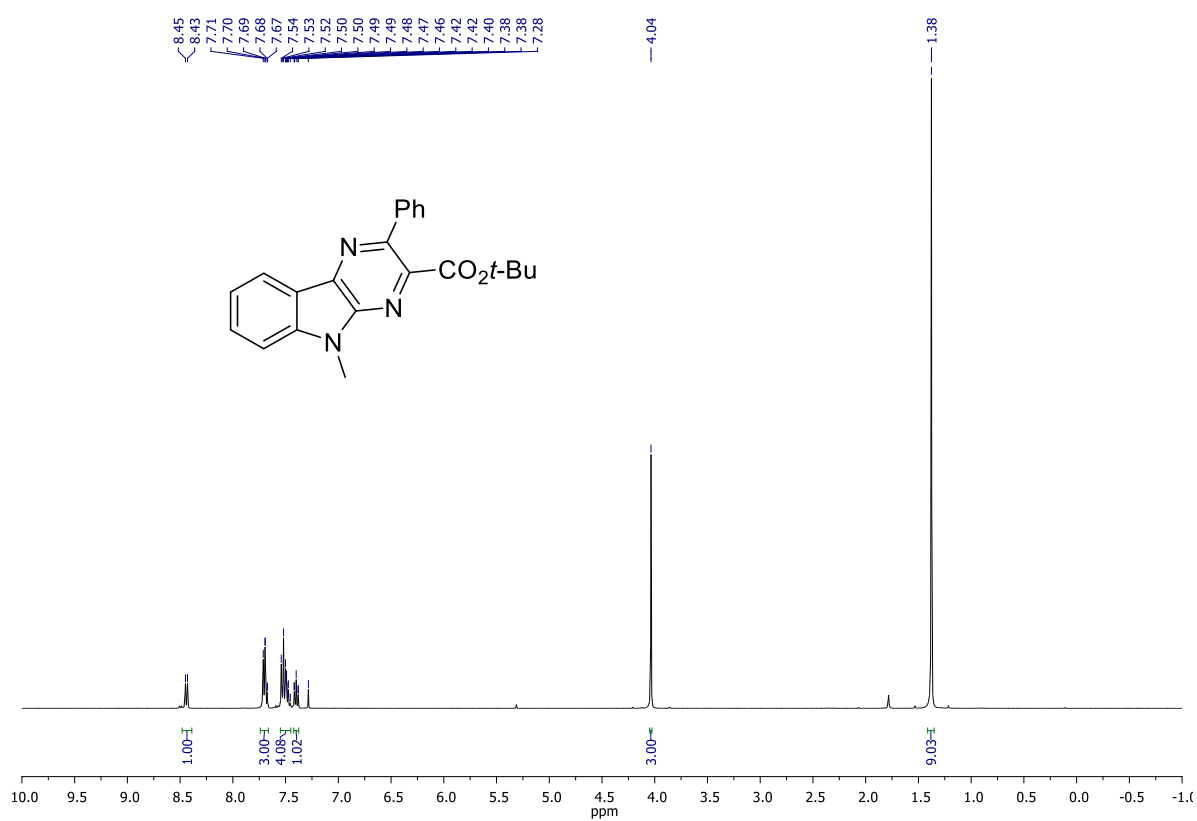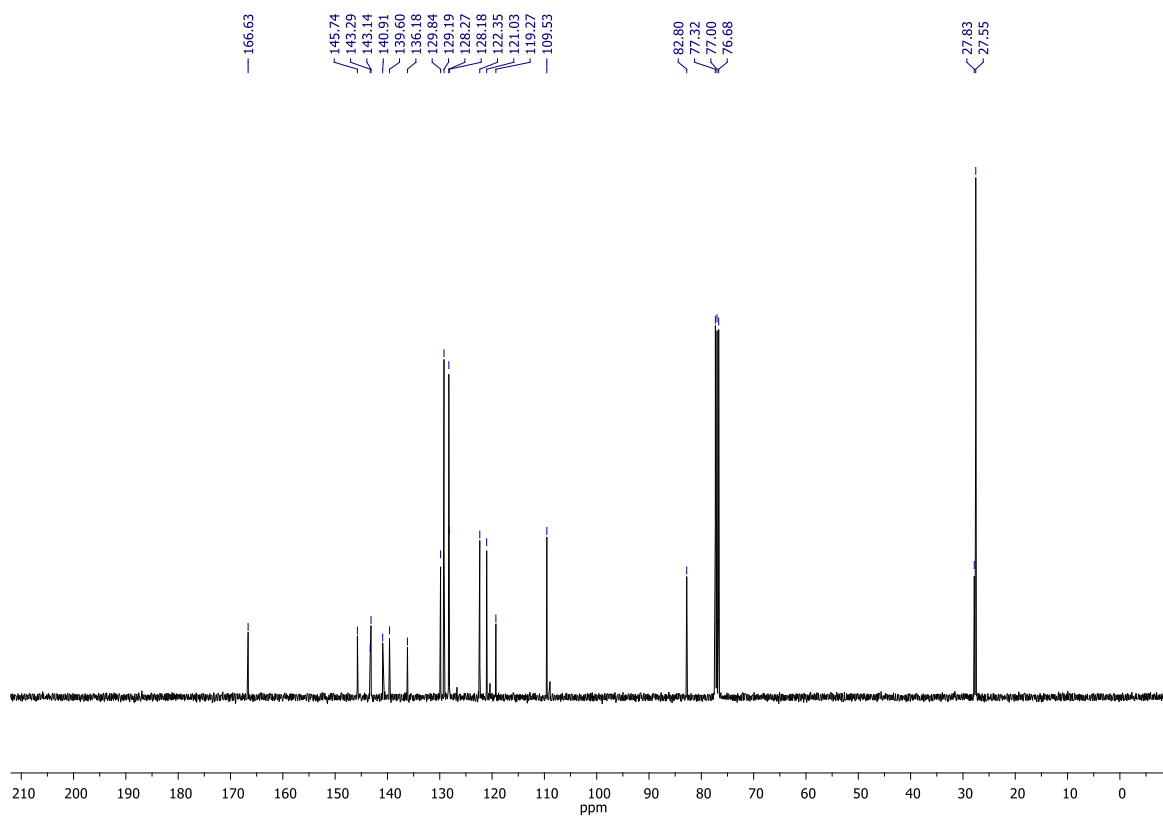

$^1\text{H}$  and  $^{13}\text{C}$  NMR spectra of compound **4I** (rotameric mixture ~ 1:1.5)

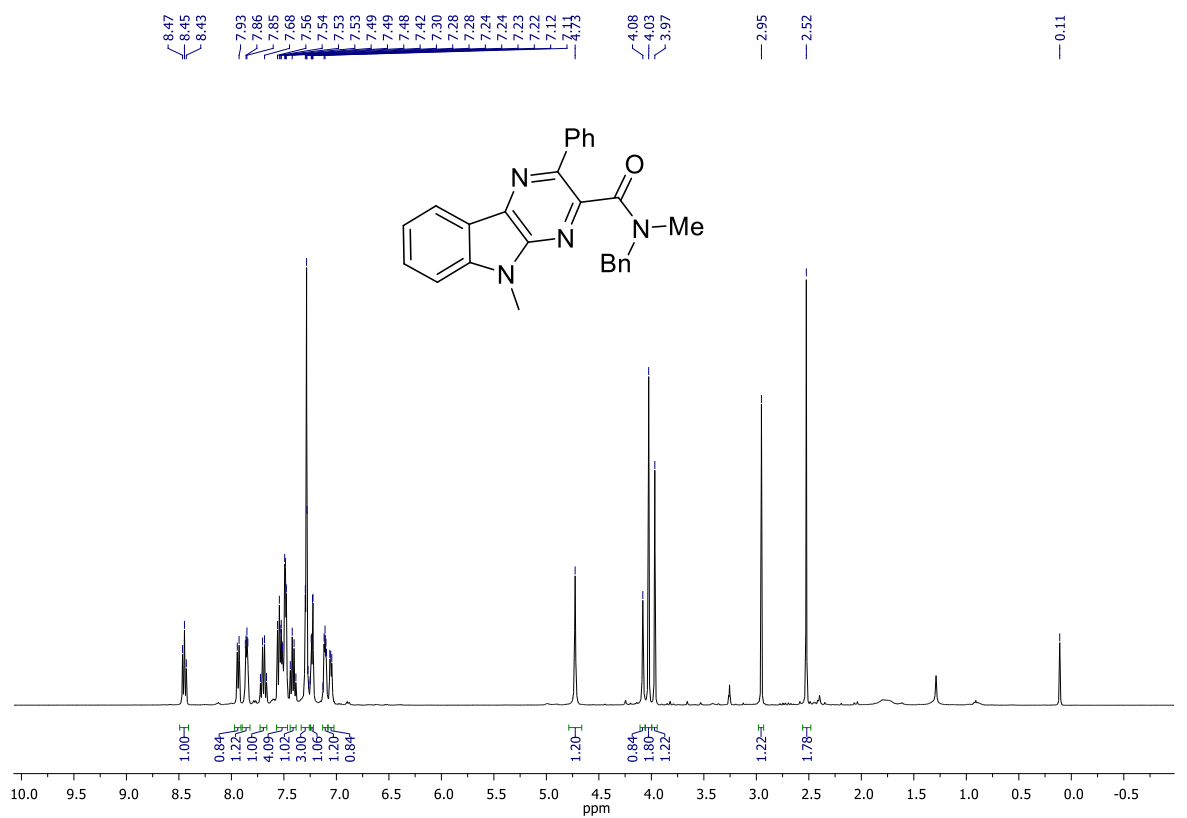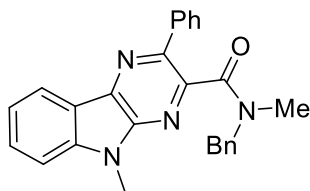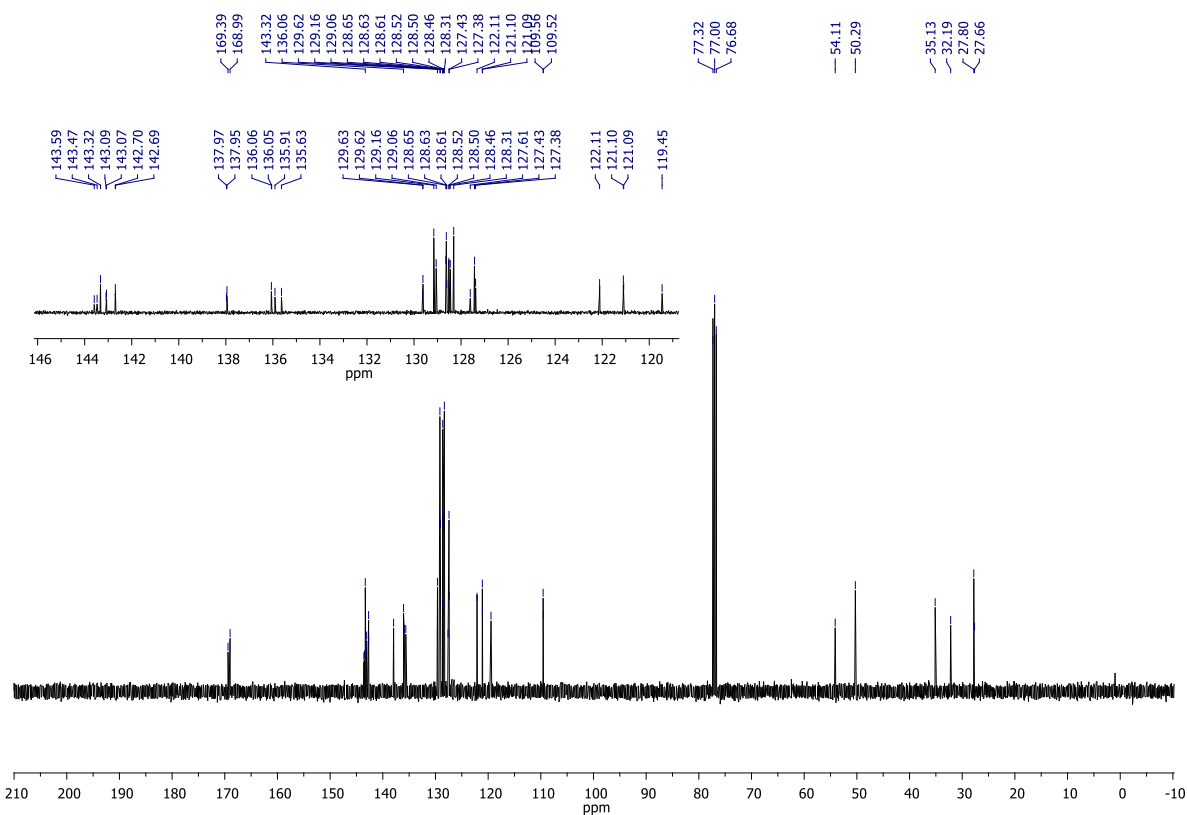

# $^1\text{H}$ and $^{13}\text{C}$ NMR spectra of compound **4m**

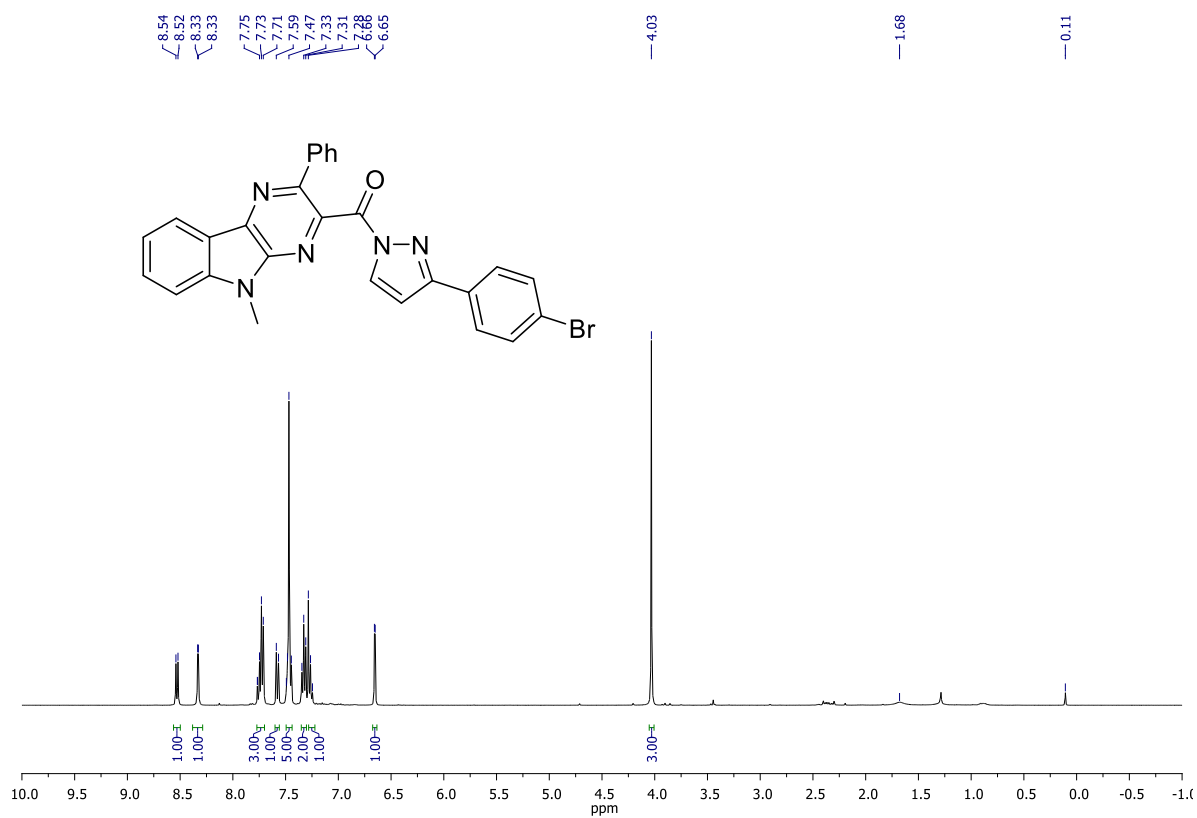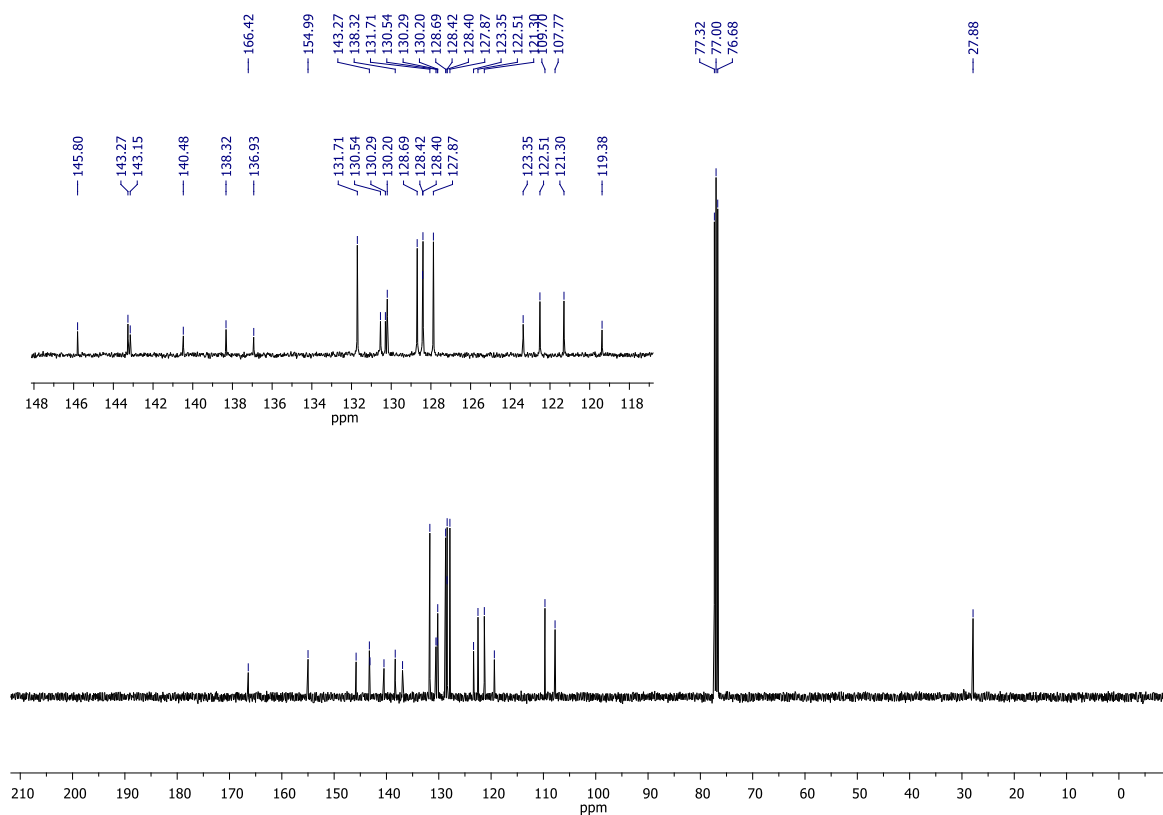

# $^1\text{H}$ and $^{13}\text{C}$ NMR spectra of compound **4n**

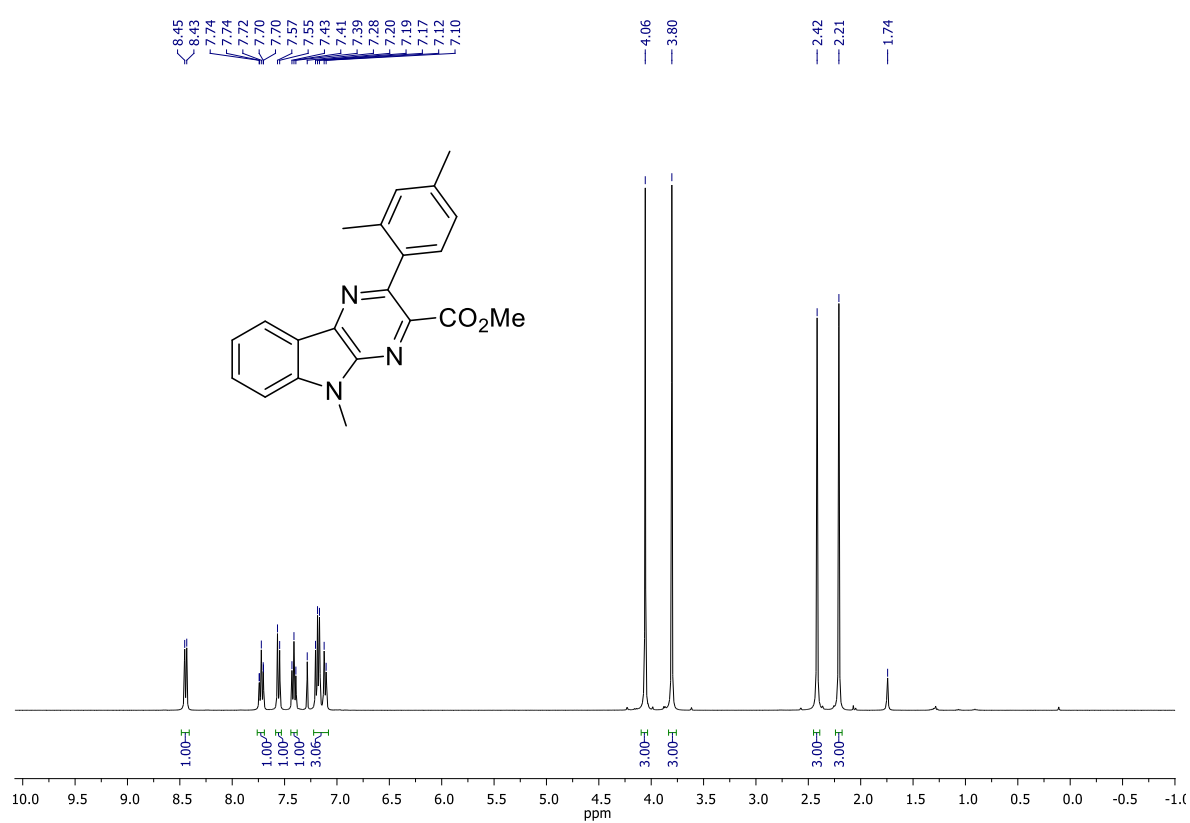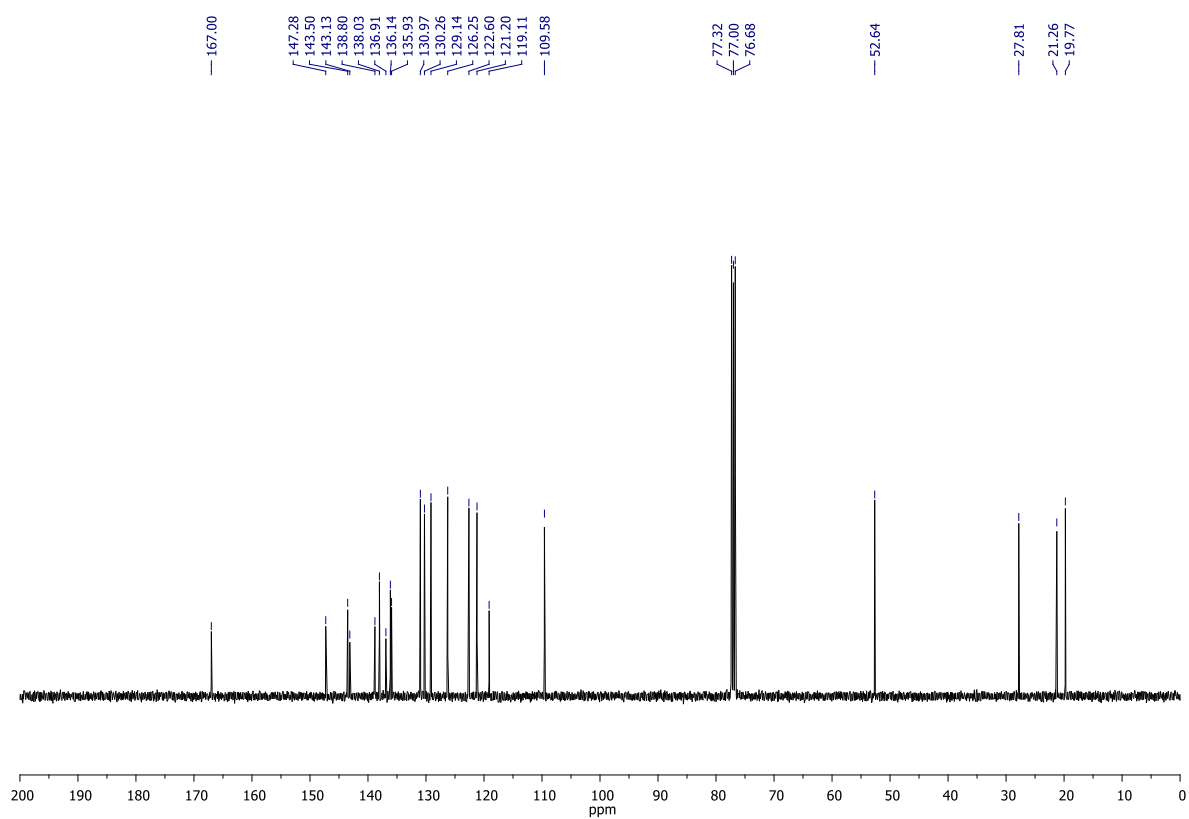

# $^1\text{H}$ and $^{13}\text{C}$ NMR spectra of compound **4o**

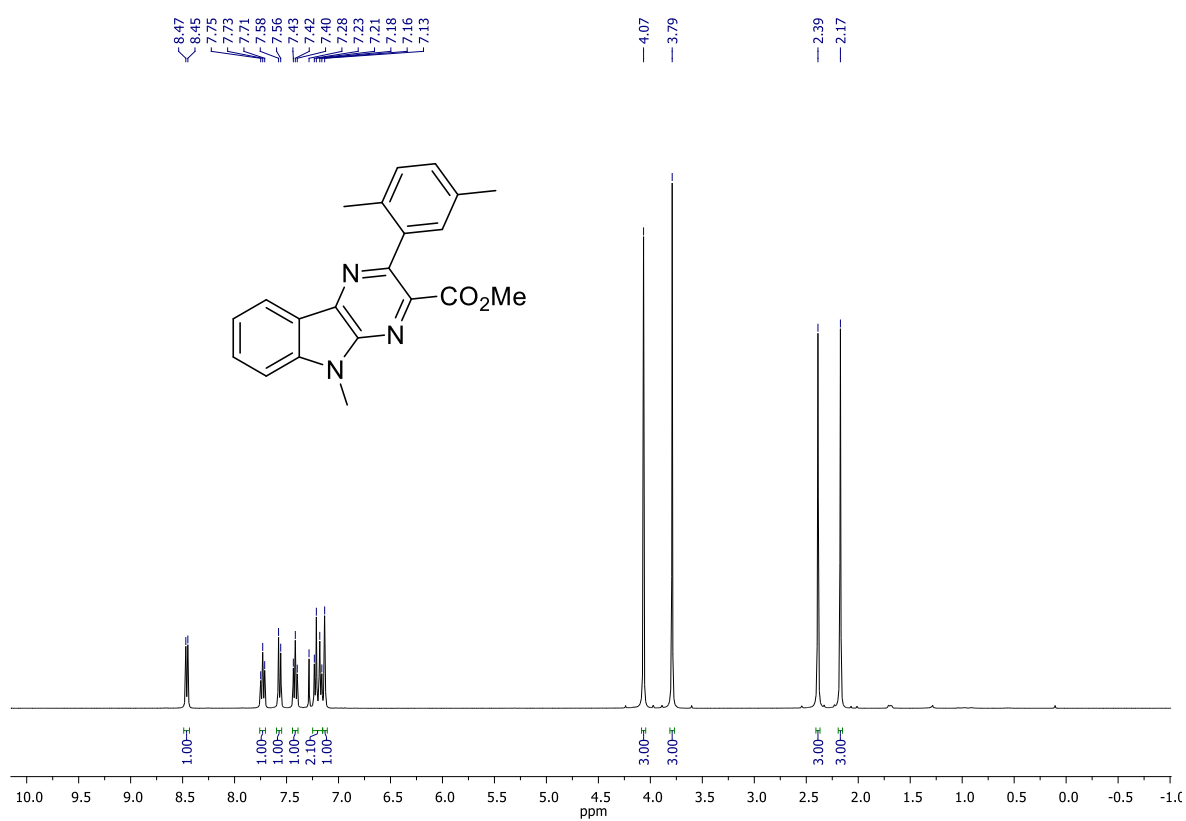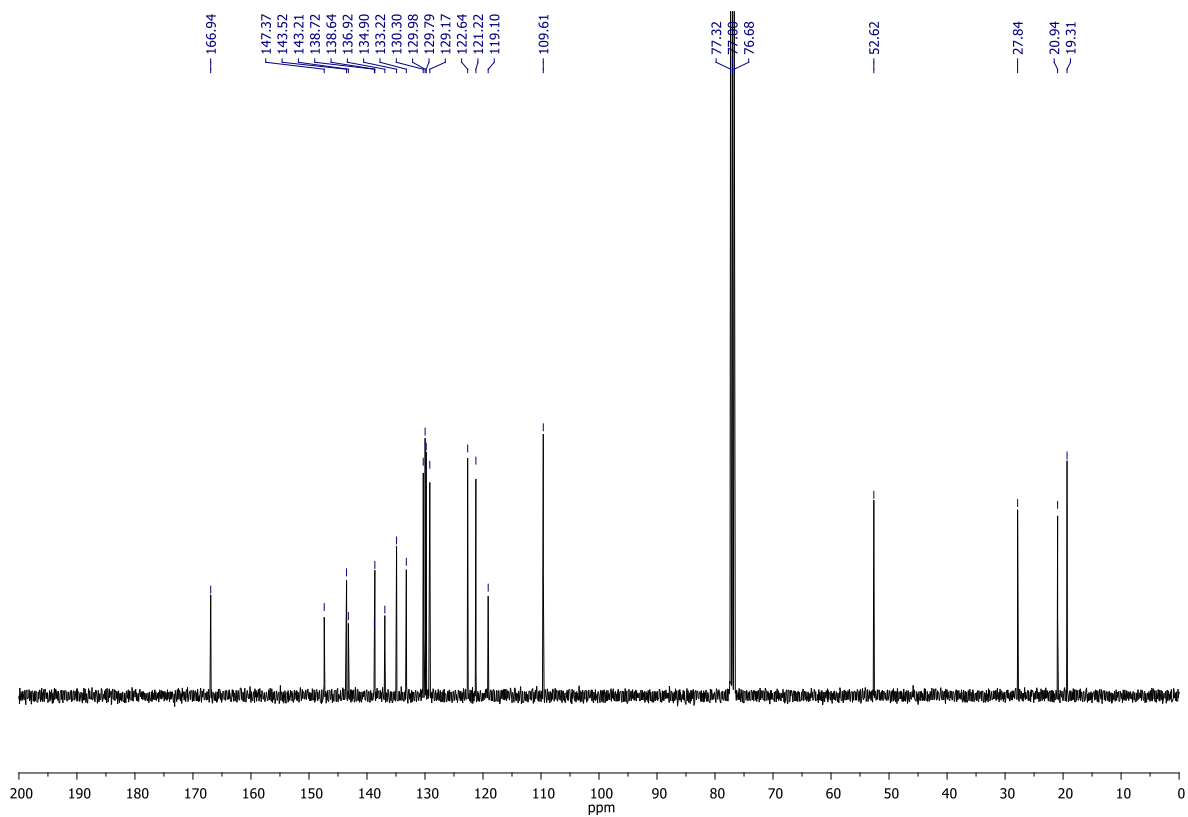

# $^1\text{H}$ and $^{13}\text{C}$ NMR spectra of compound **4p**

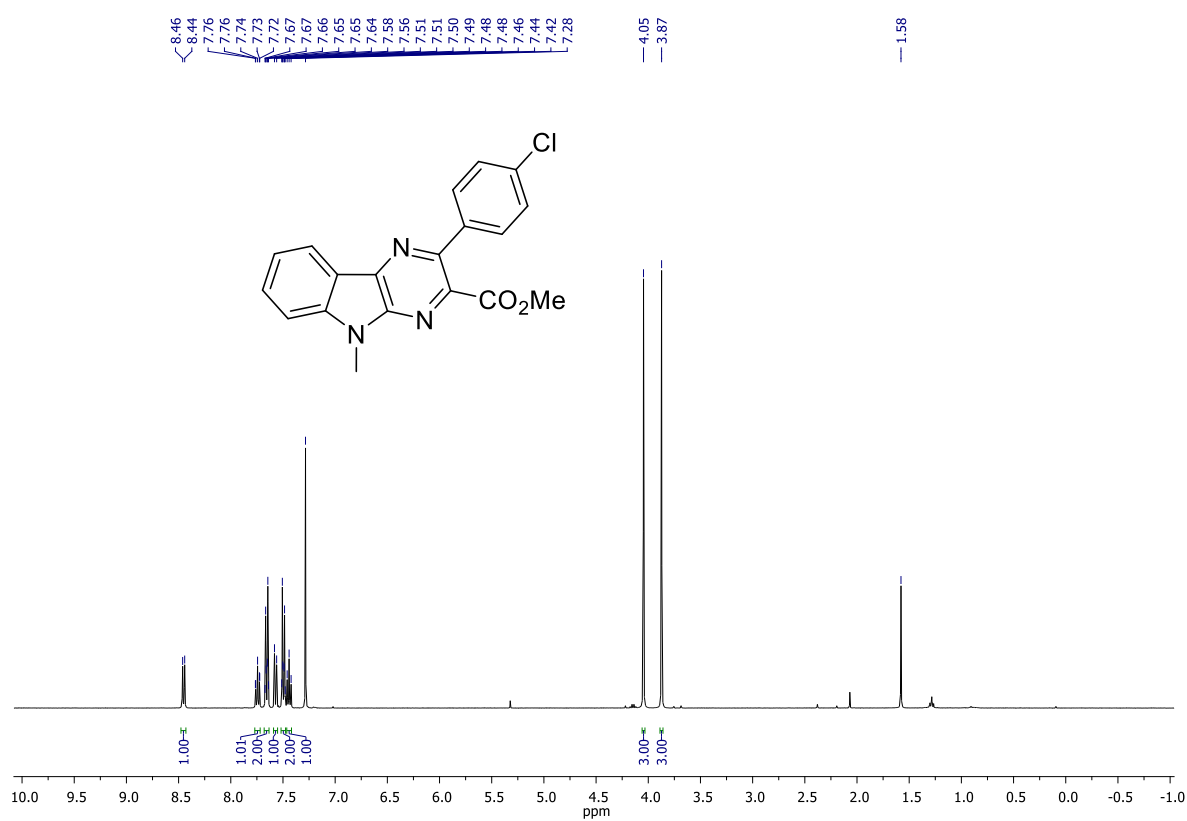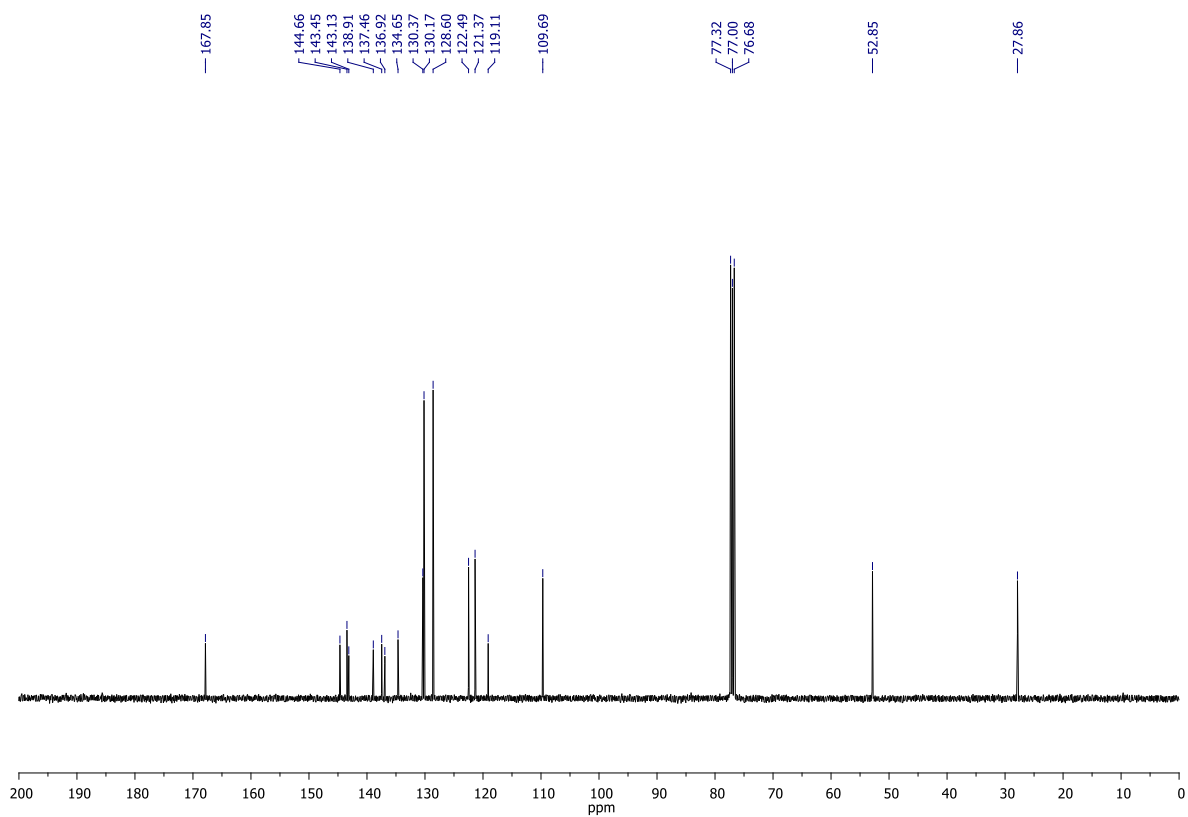



# $^1\text{H}$ and $^{13}\text{C}$ NMR spectra of compound **4q**

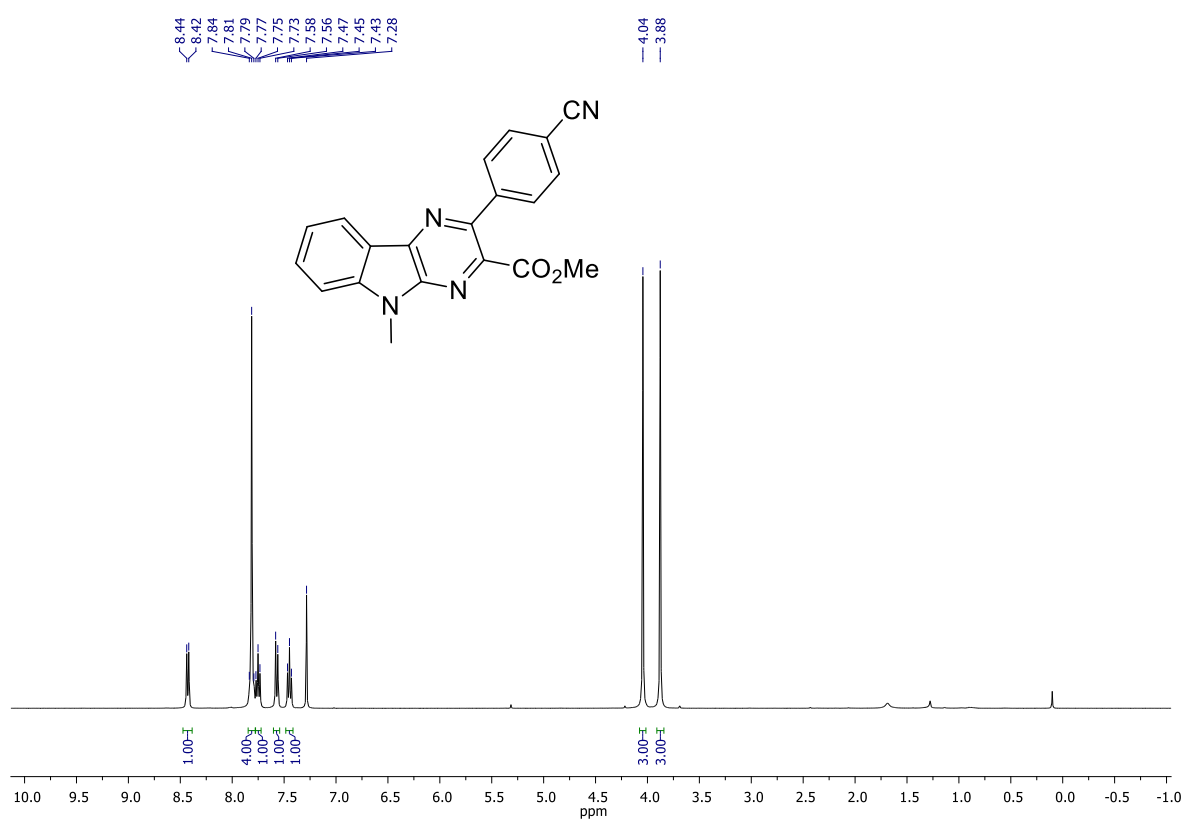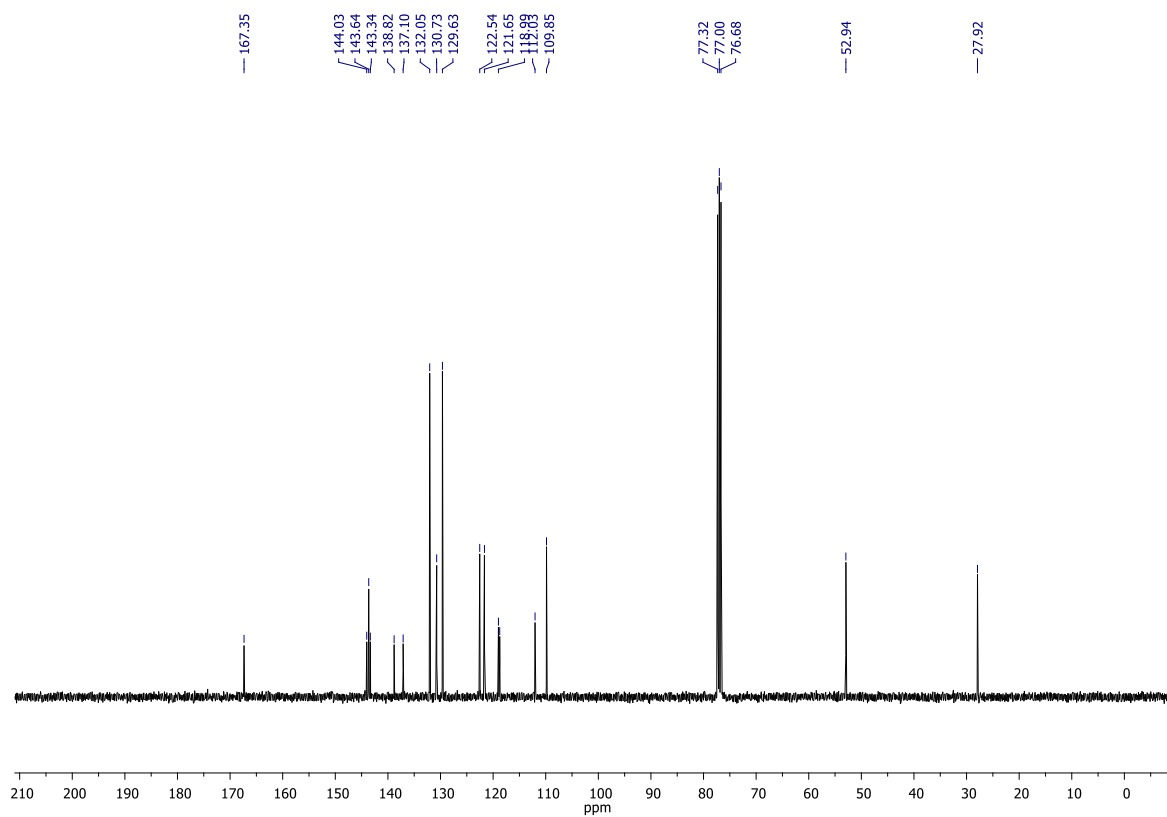

# $^1\text{H}$ and $^{13}\text{C}$ NMR spectra of compound **4r**

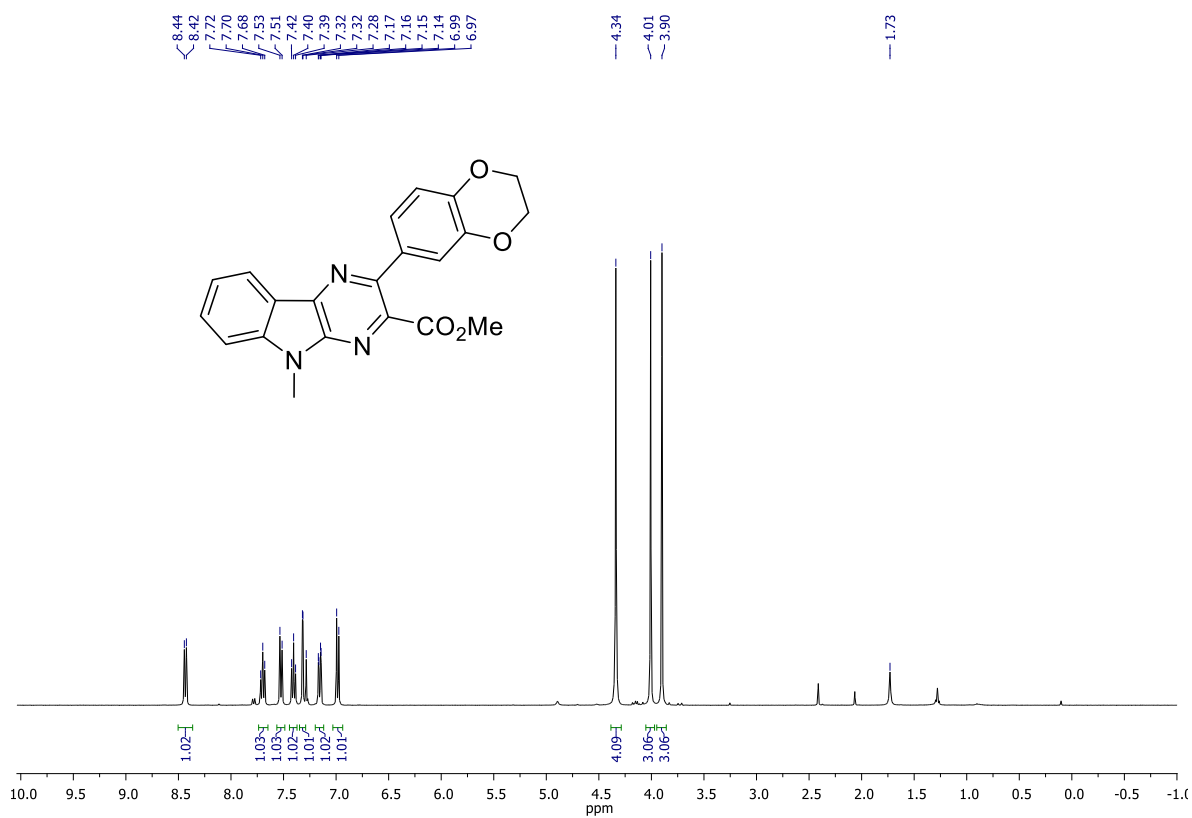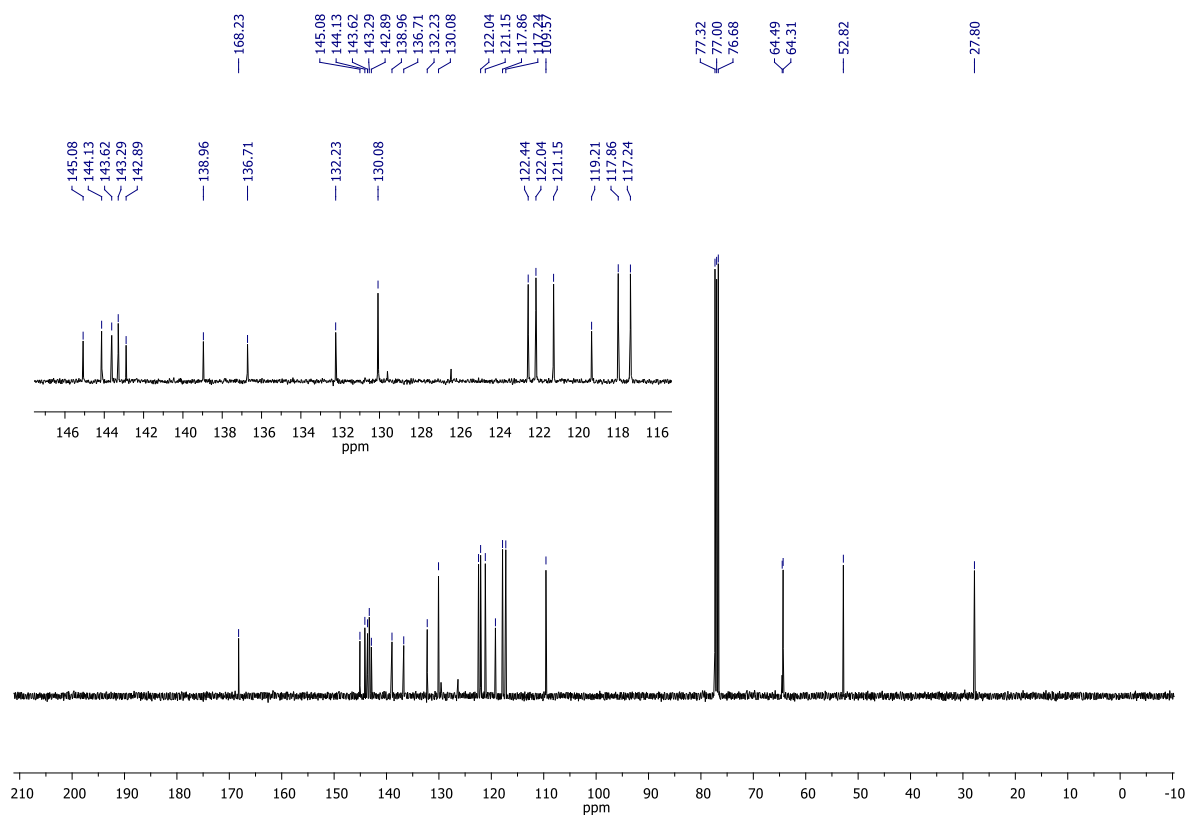

# $^1\text{H}$ and $^{13}\text{C}$ NMR spectra of compound **4s**

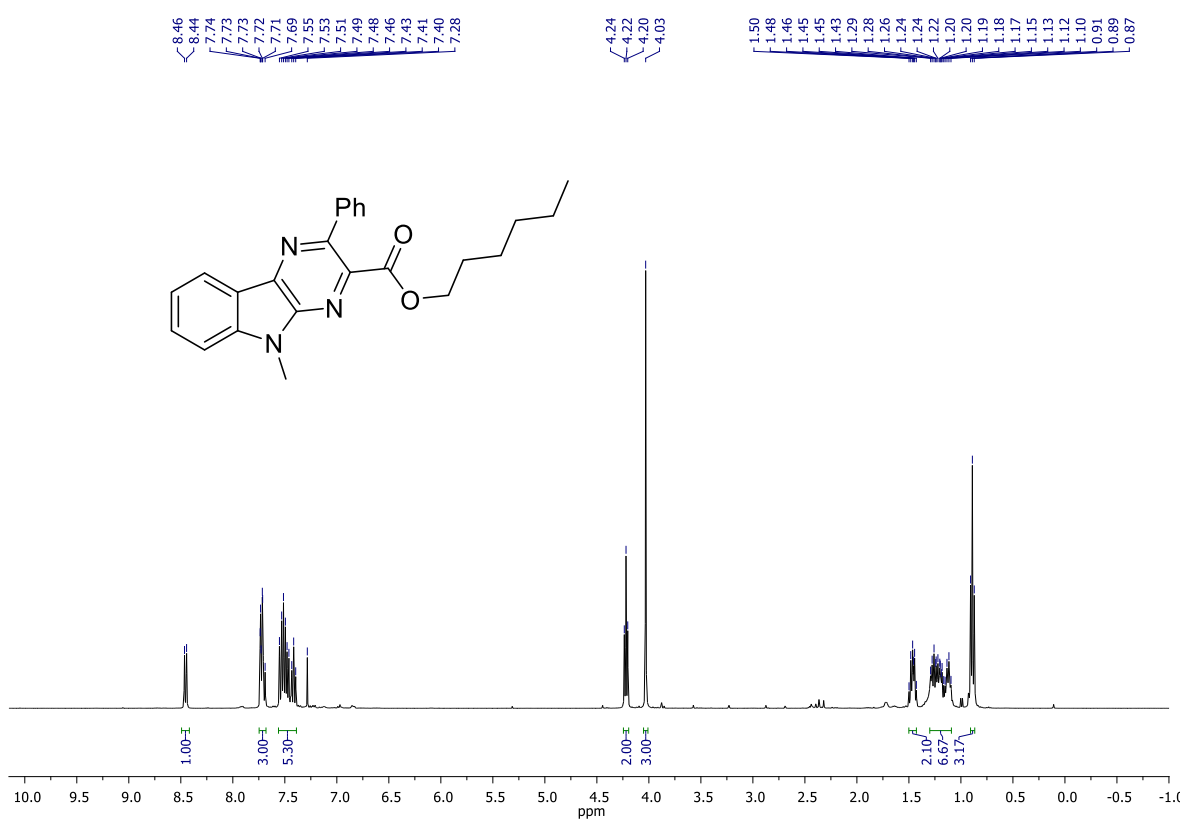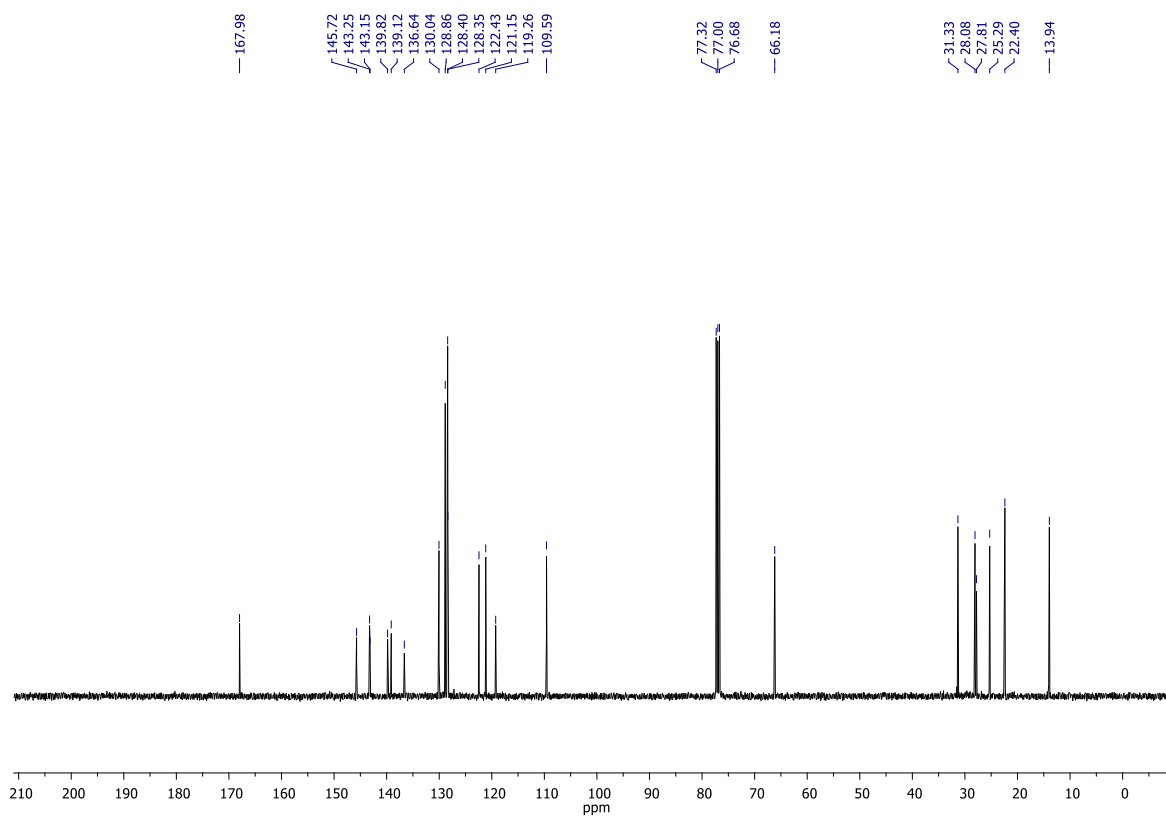

# $^1\text{H}$ and $^{13}\text{C}$ NMR spectra of compound **4t**

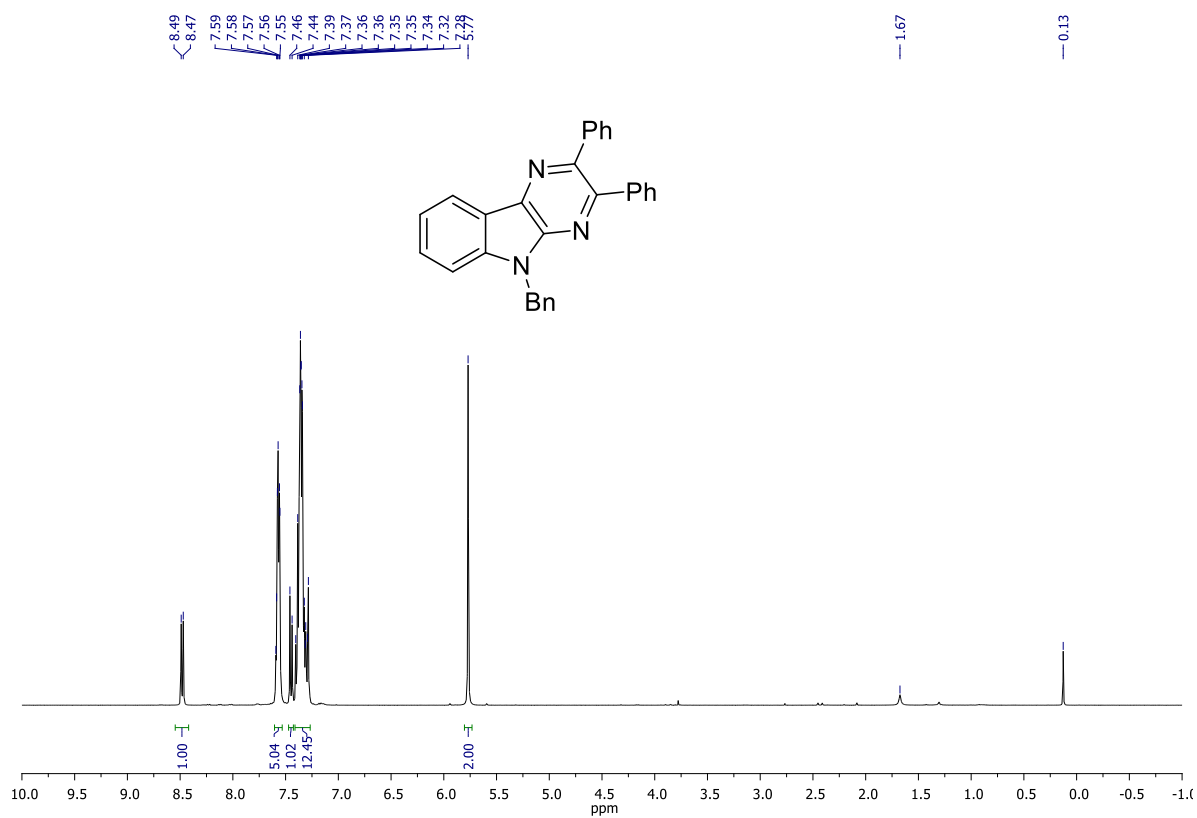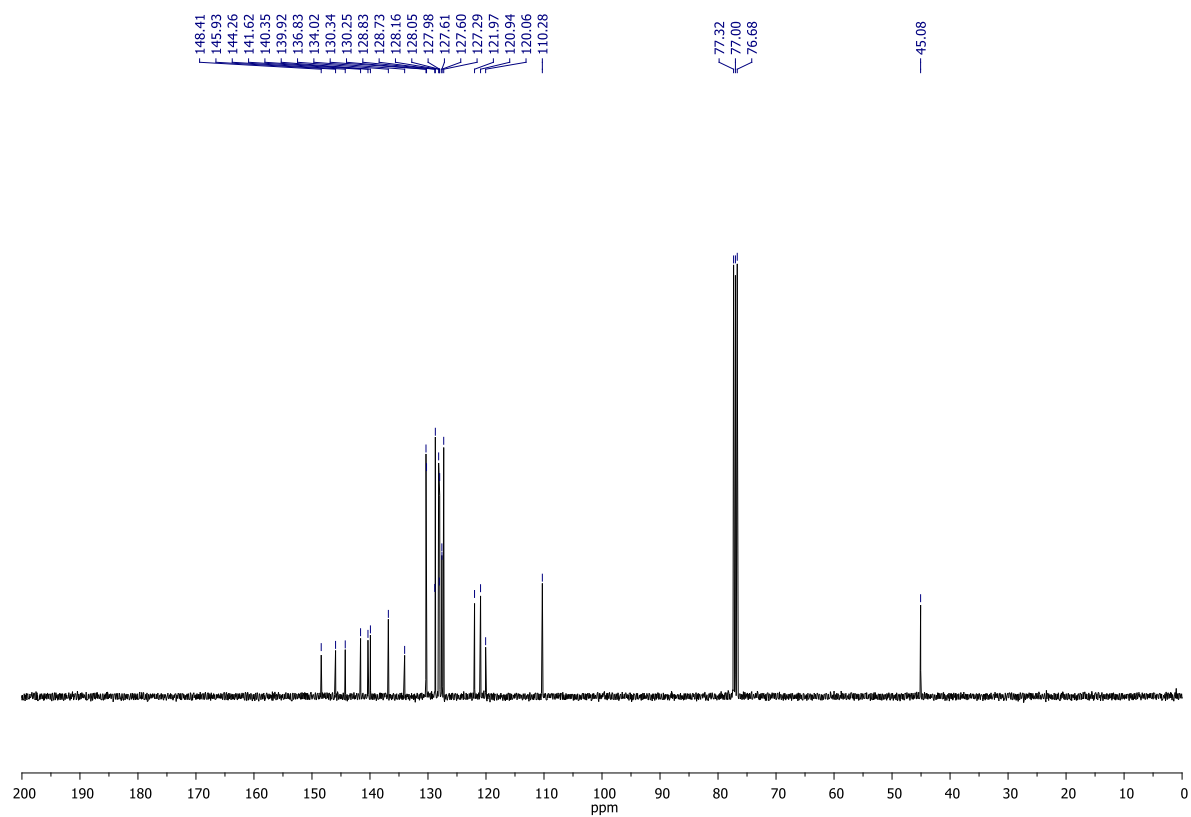

# $^1\text{H}$ and $^{13}\text{C}$ NMR spectra of compound **4u**

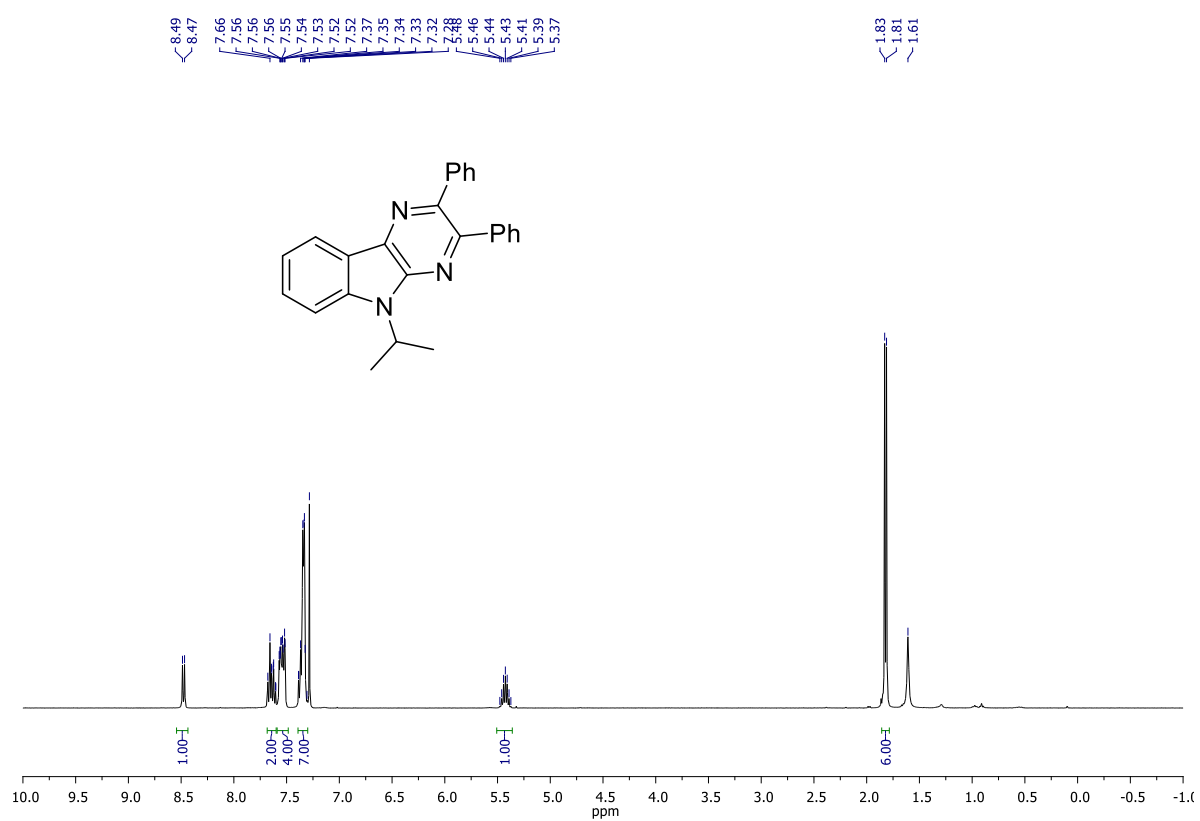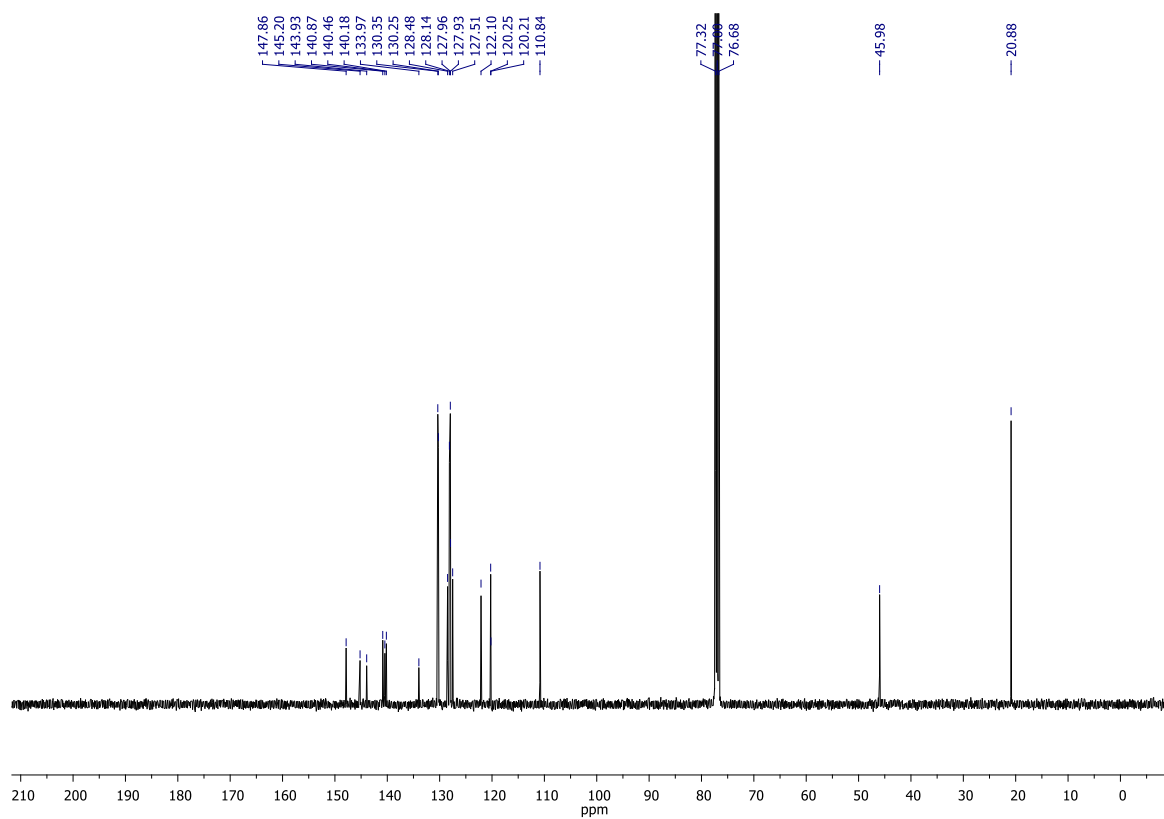

$^1\text{H}$  and  $^{13}\text{C}$  NMR spectra of compound **4v**

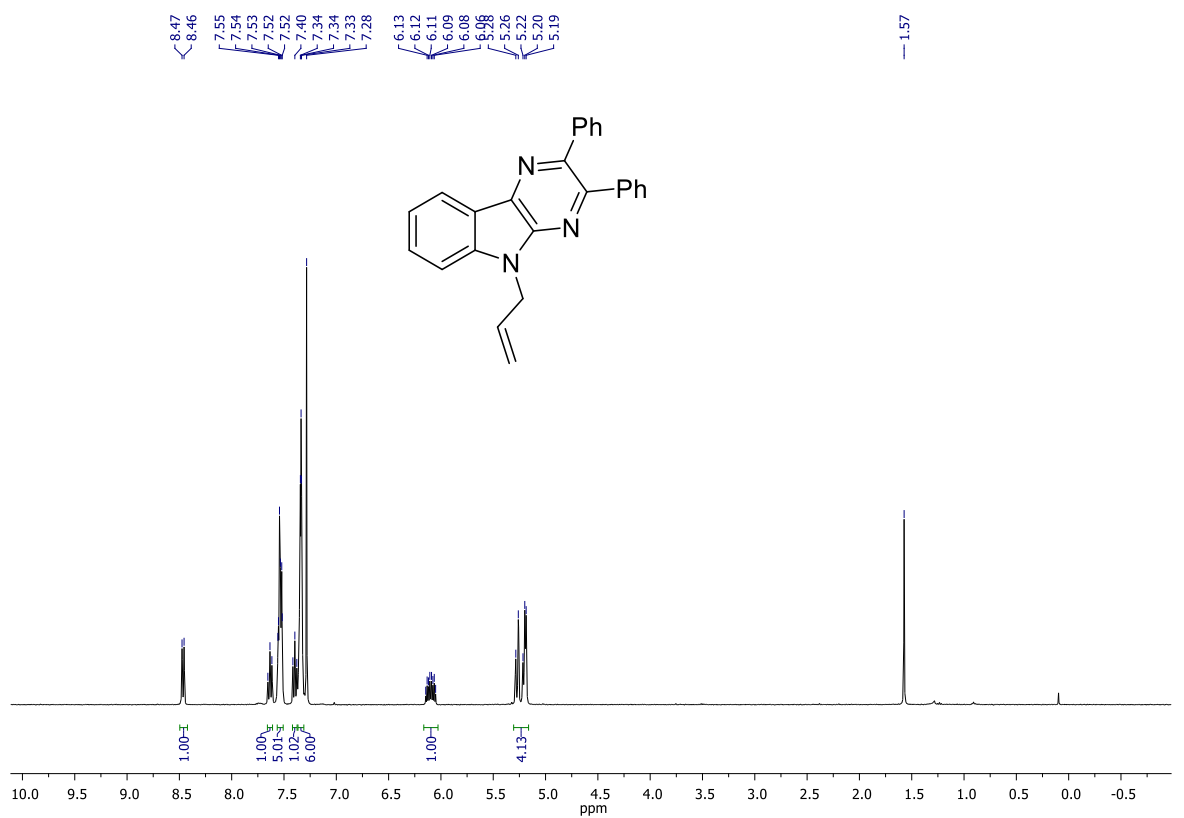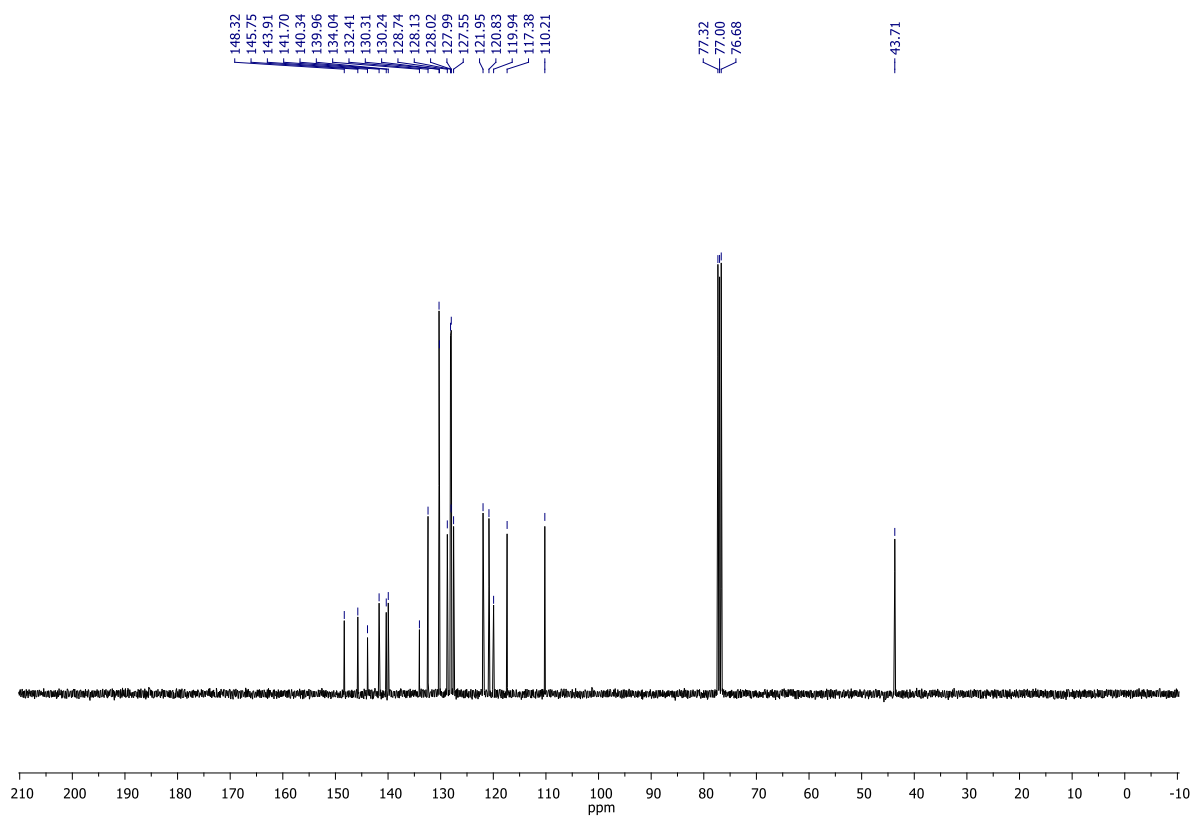

$^1\text{H}$  and  $^{13}\text{C}$  NMR spectra of compound **4w**

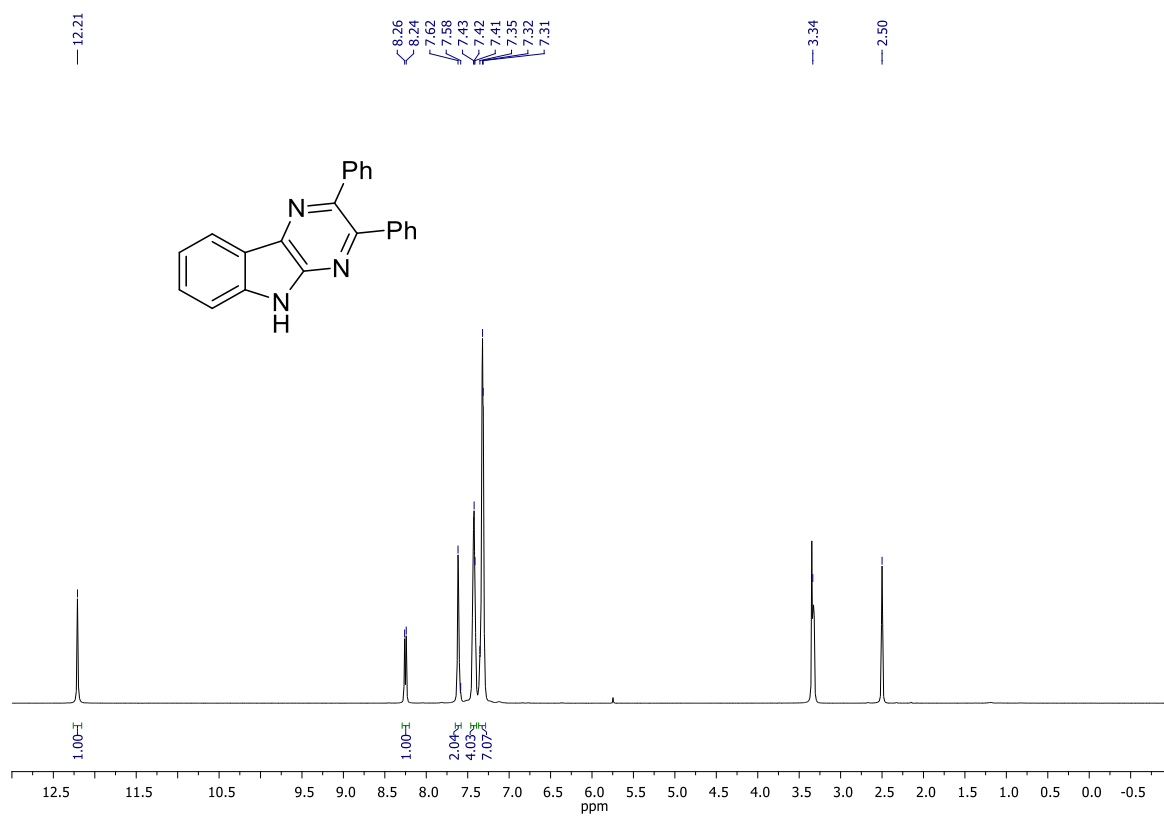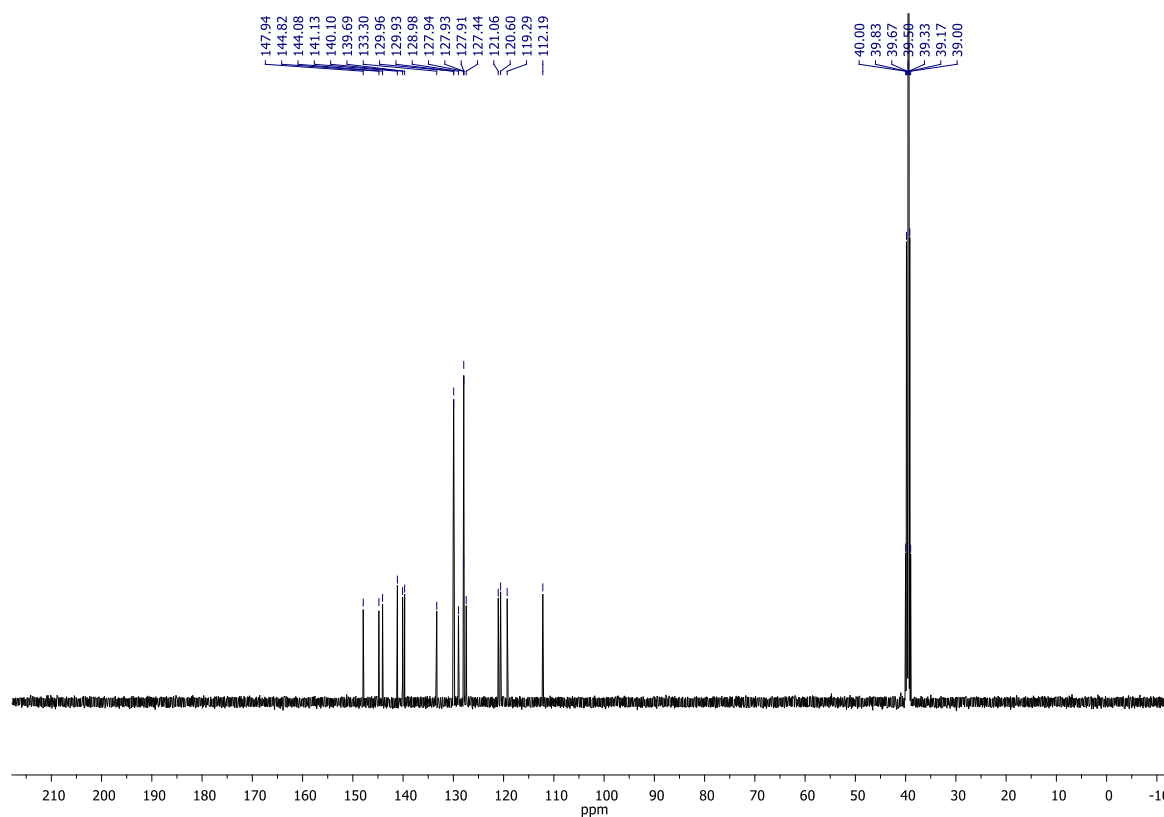

# $^1\text{H}$ and $^{13}\text{C}$ NMR spectra of compound **4x**

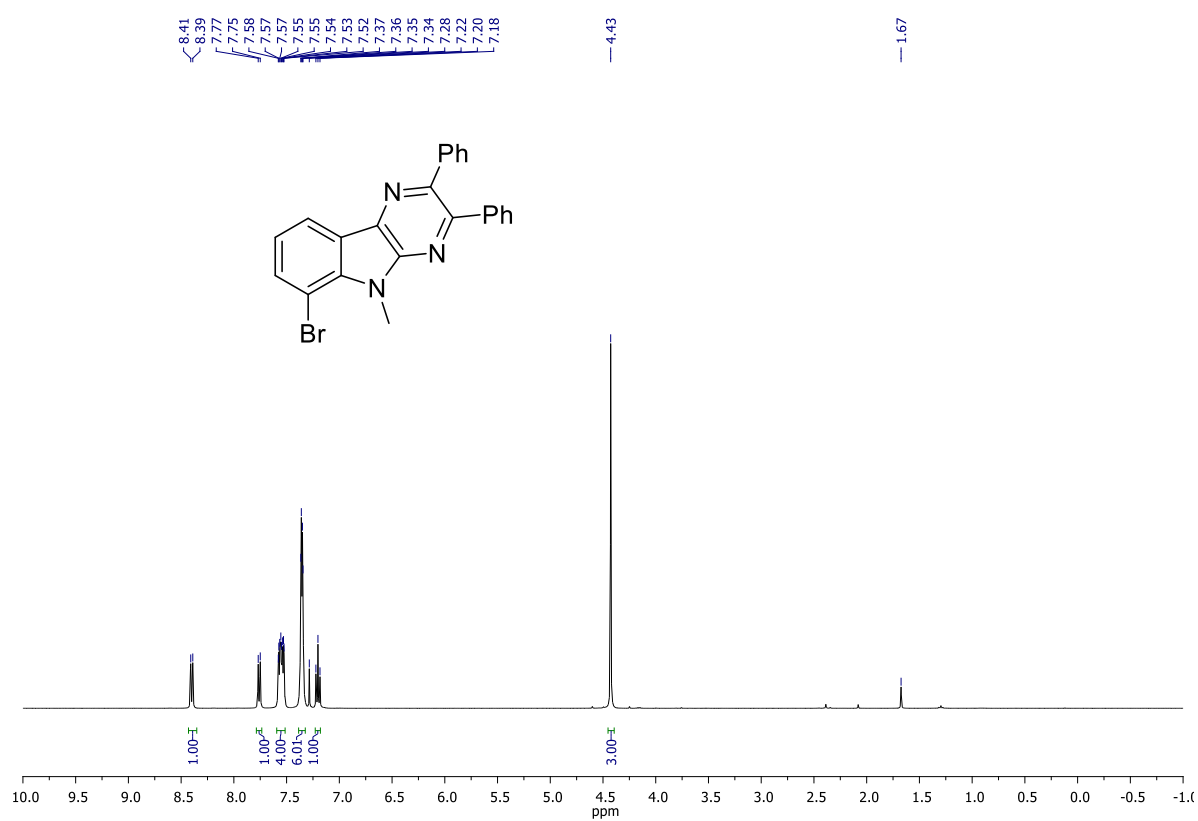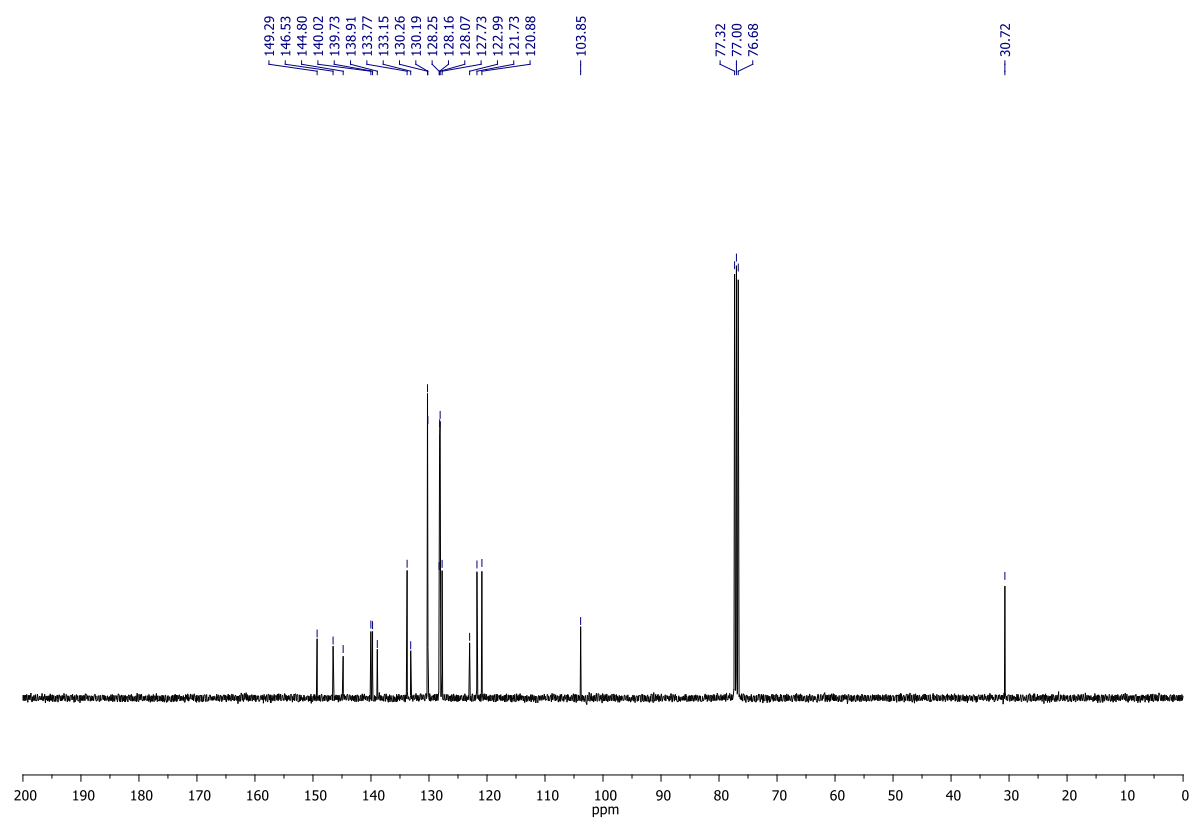



# $^1\text{H}$ and $^{13}\text{C}$ NMR spectra of compound **4y**

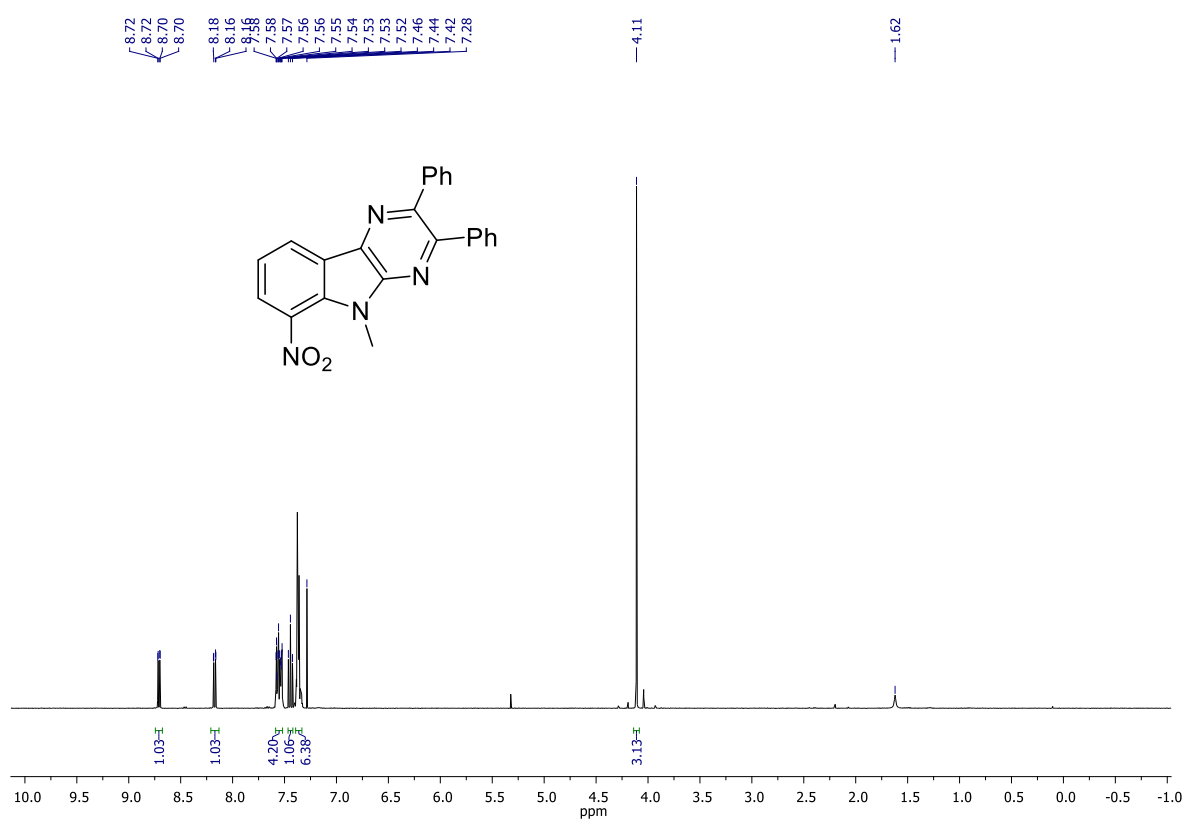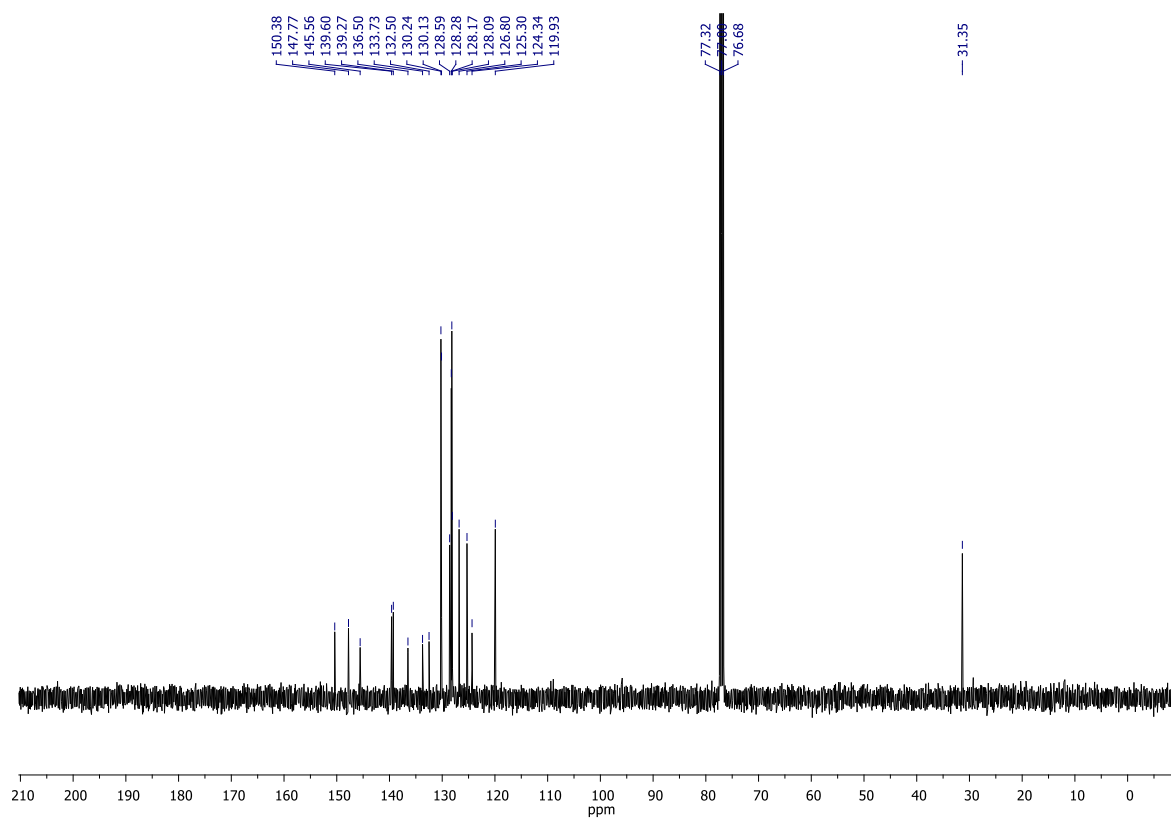

# $^1\text{H}$ and $^{13}\text{C}$ NMR spectra of compound **4z**

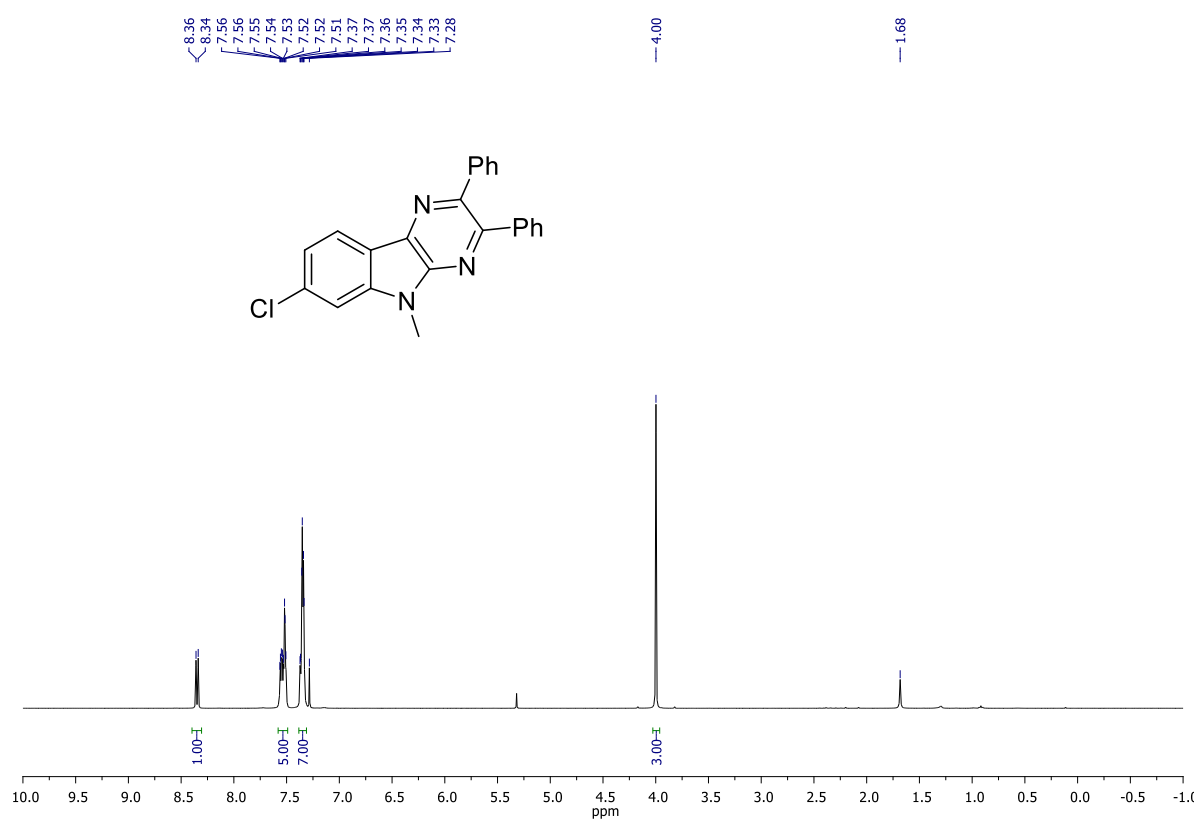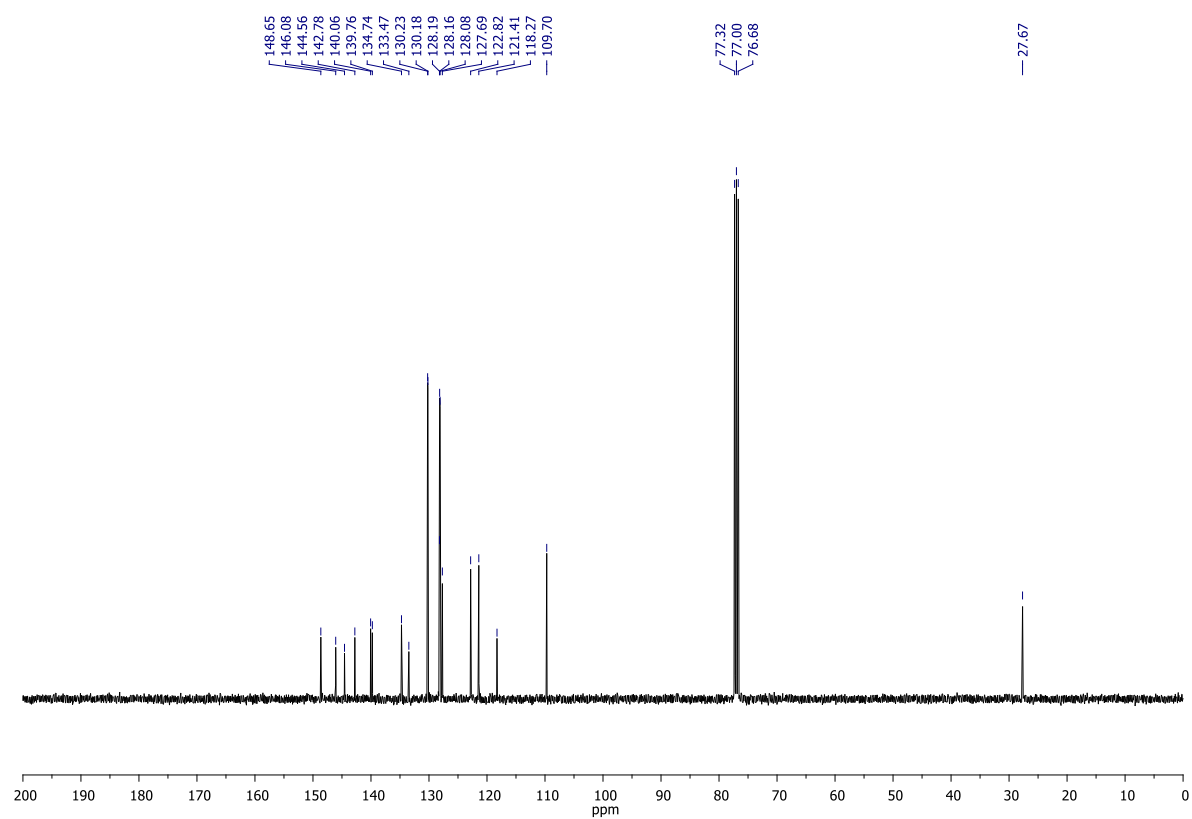

# $^1\text{H}$ and $^{13}\text{C}$ NMR spectra of compound **4aa**

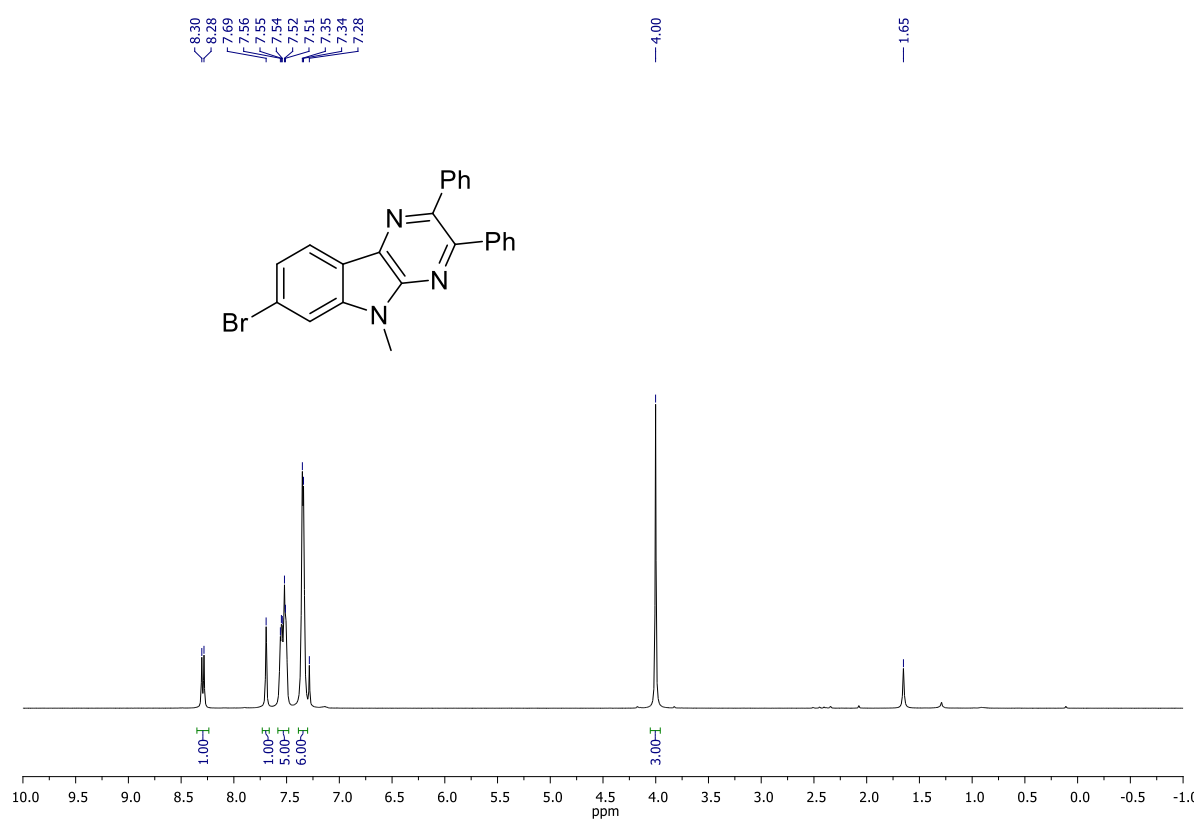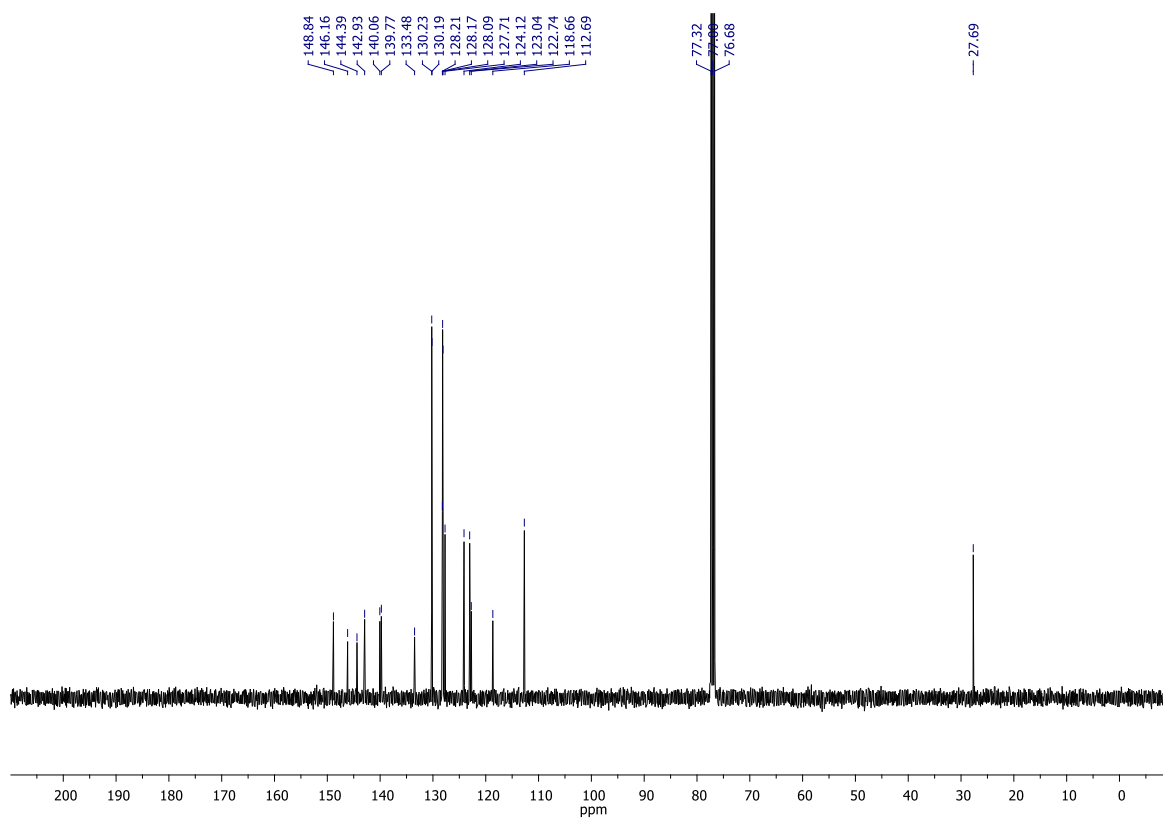

# $^1\text{H}$ and $^{13}\text{C}$ NMR spectra of compound **4ab**

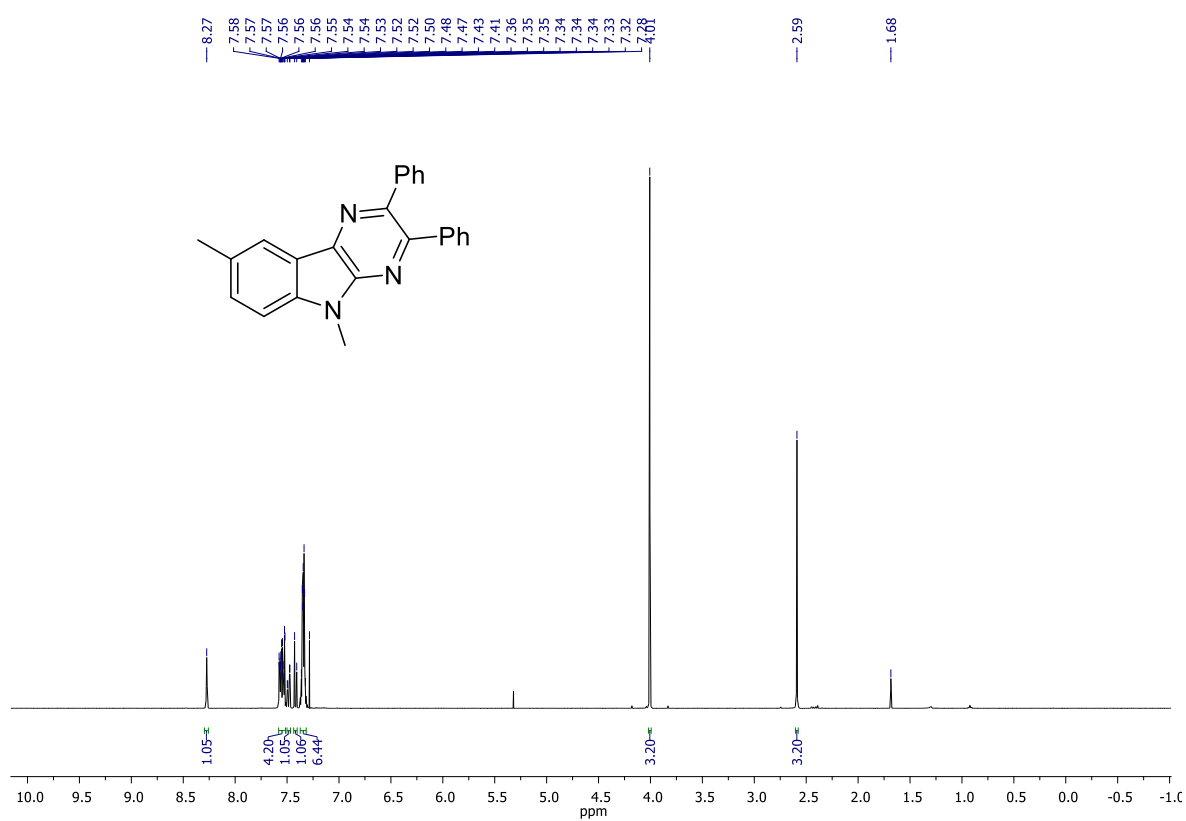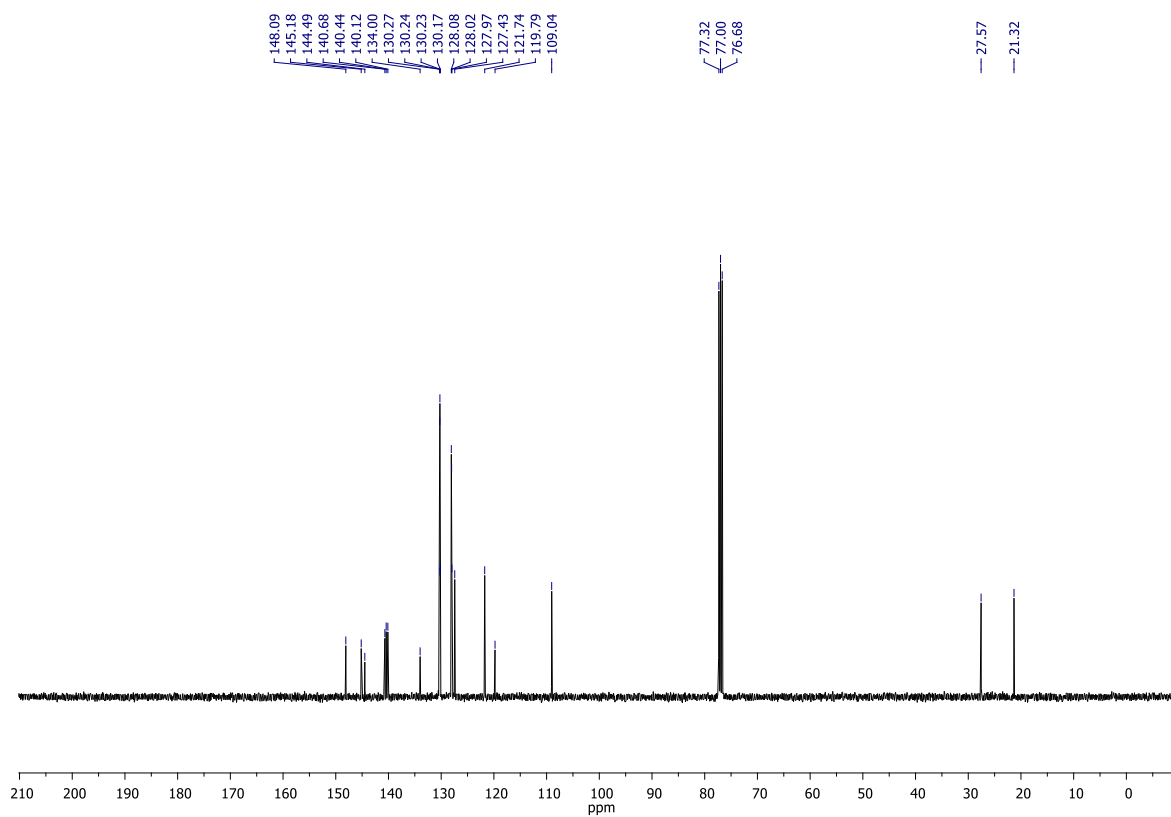

# $^1\text{H}$ and $^{13}\text{C}$ NMR spectra of compound **4ac**

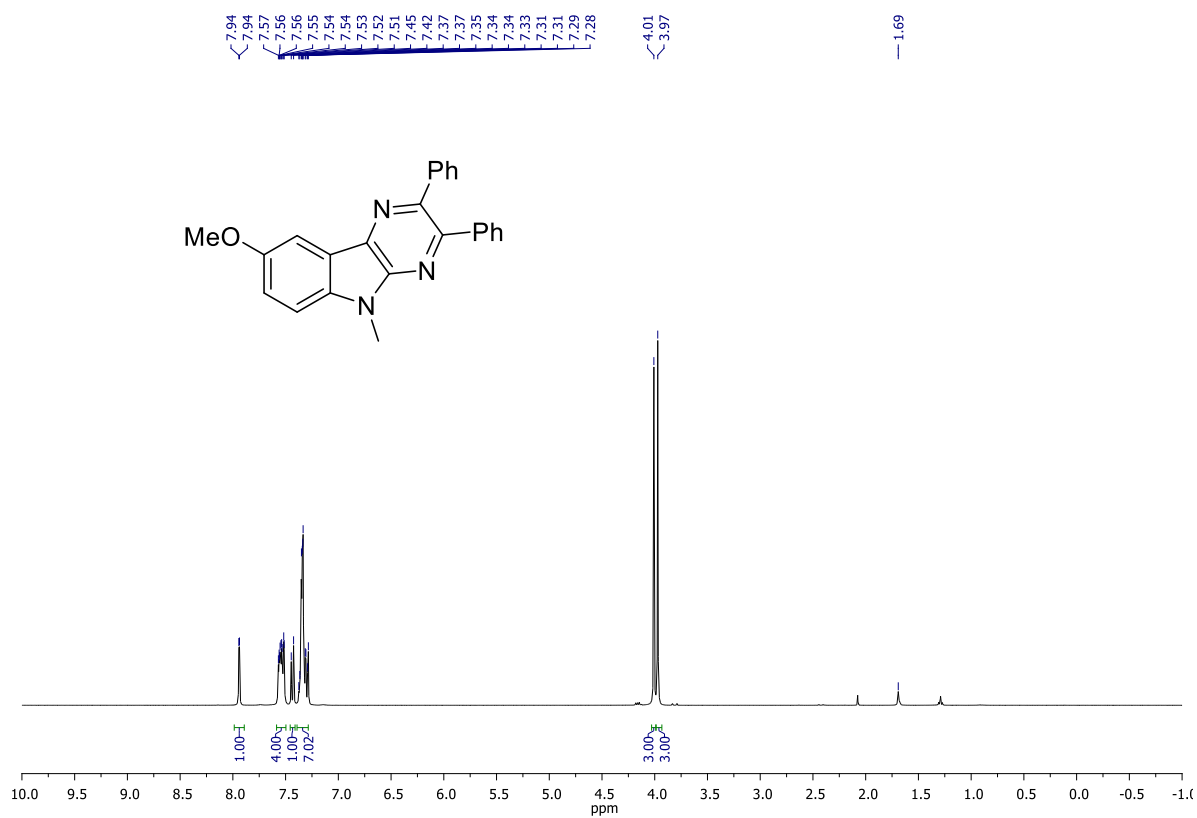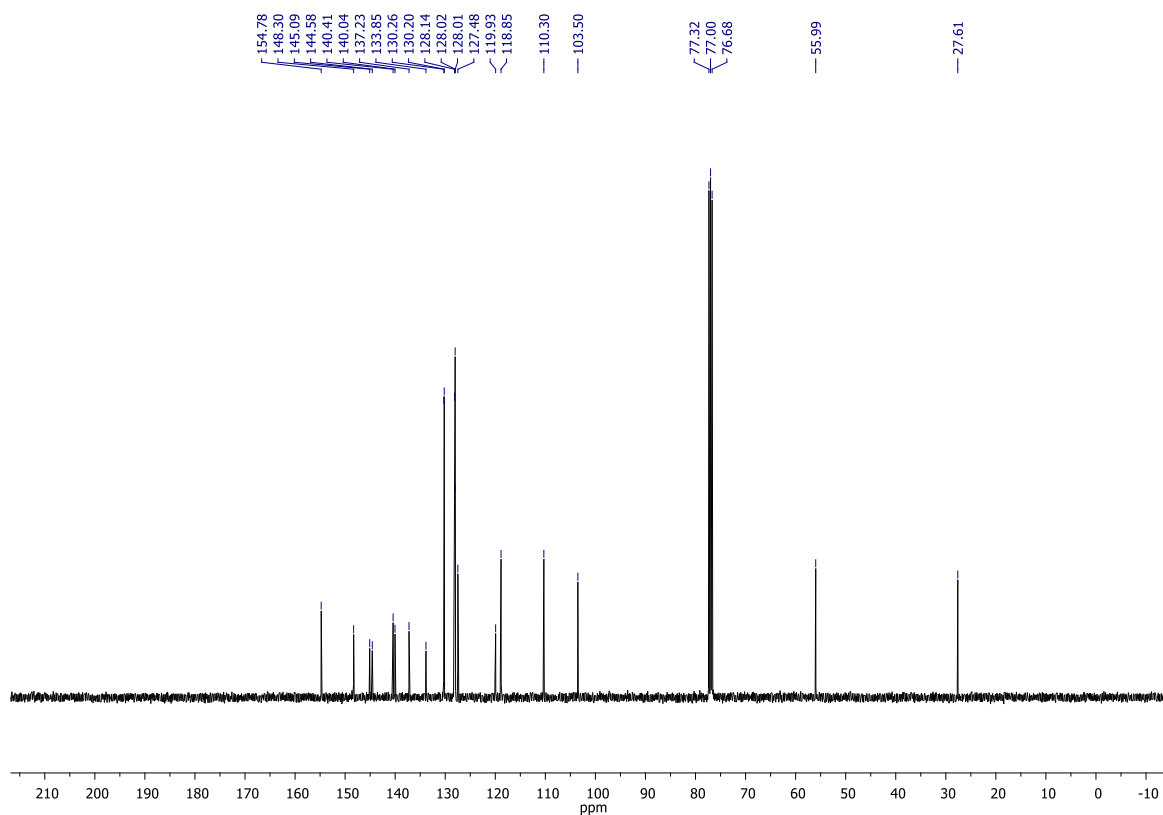

# $^1\text{H}$ and $^{13}\text{C}$ NMR spectra of compound **4ad**

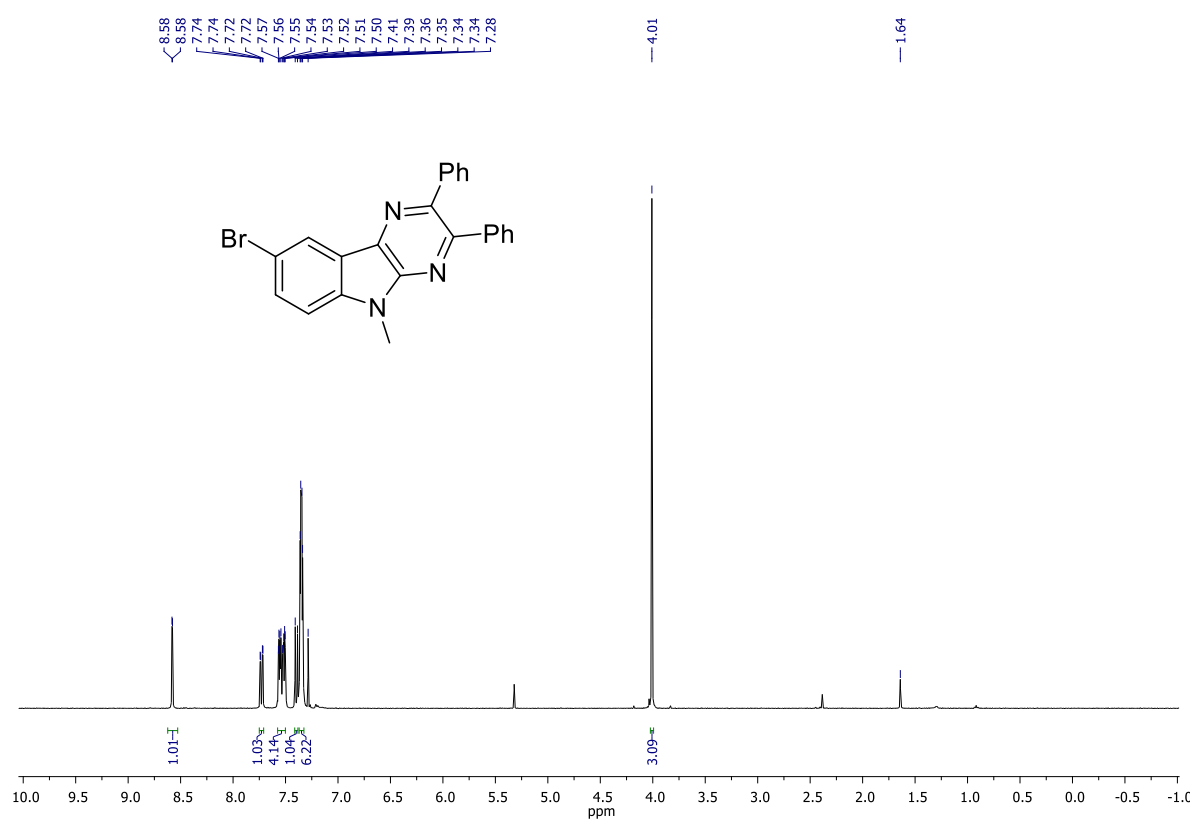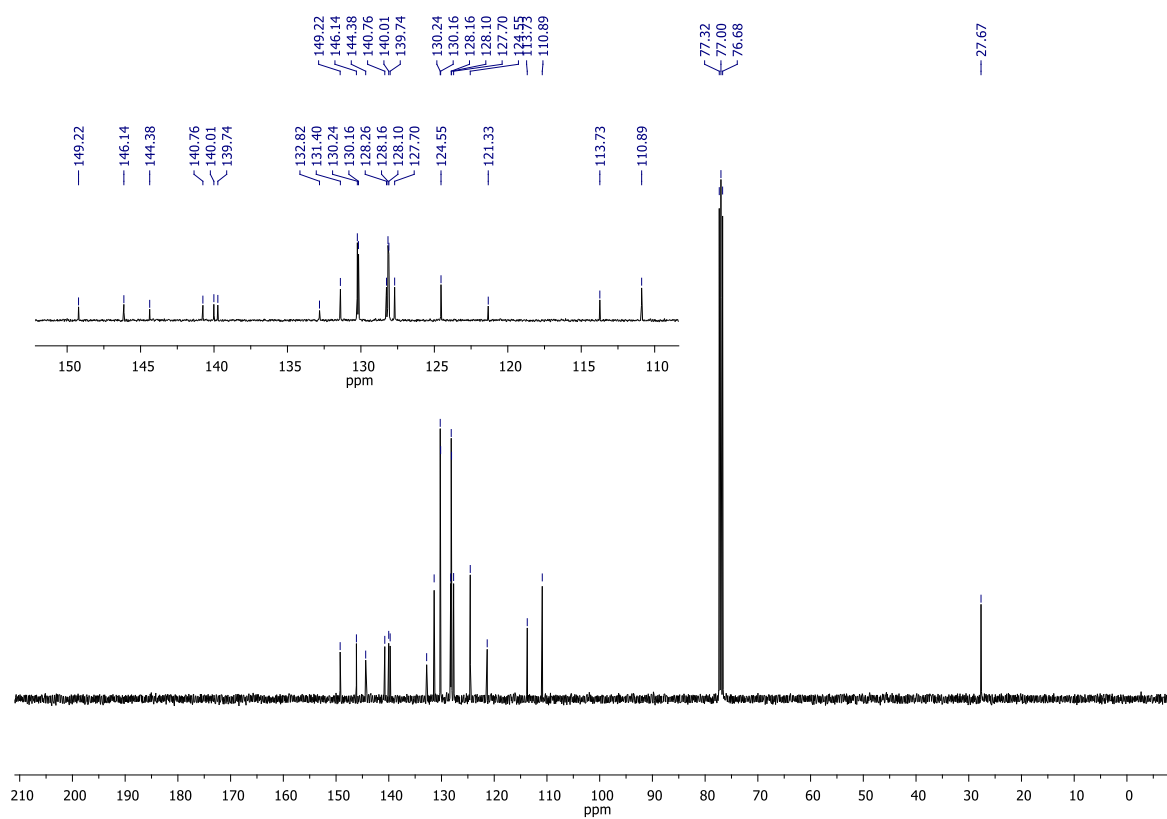

$^1\text{H}$  and  $^{13}\text{C}$  NMR spectra of compound **4ae**

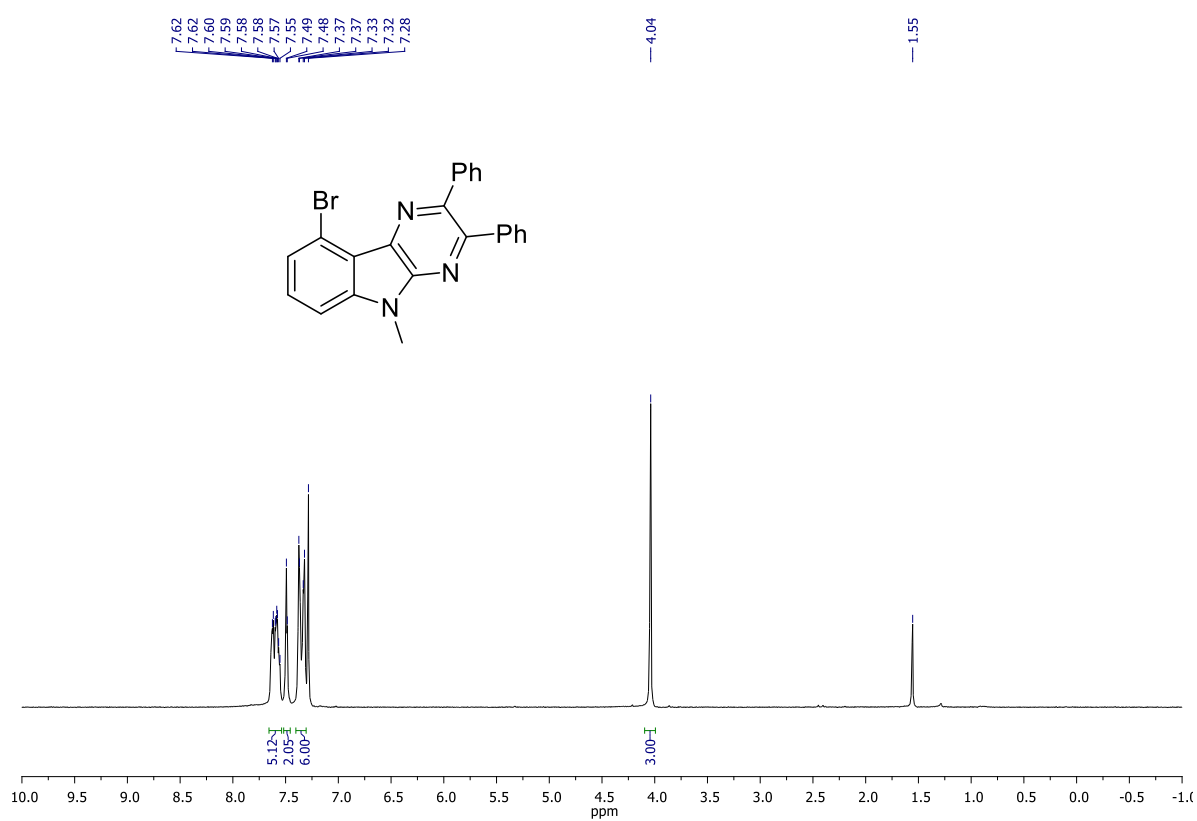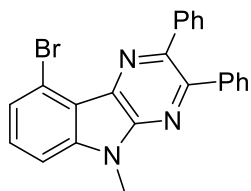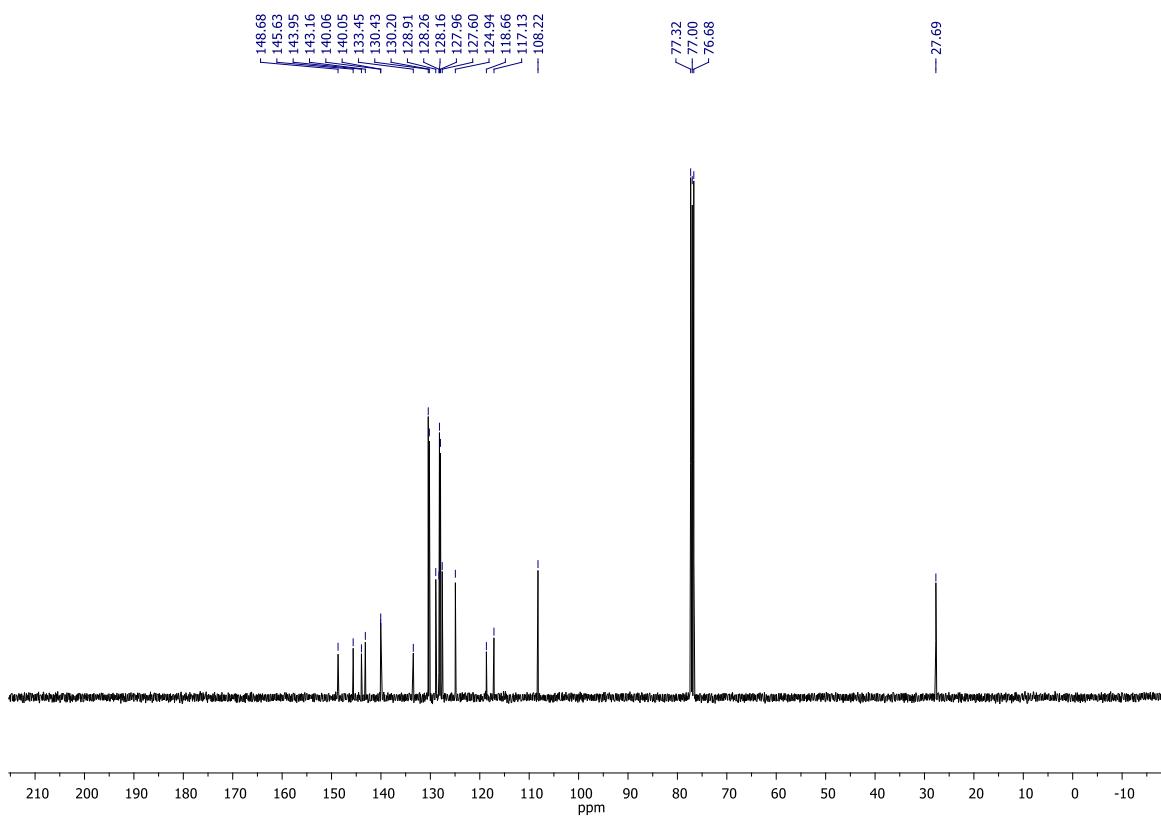

# $^1\text{H}$ and $^{13}\text{C}$ NMR spectra of compound **4af**

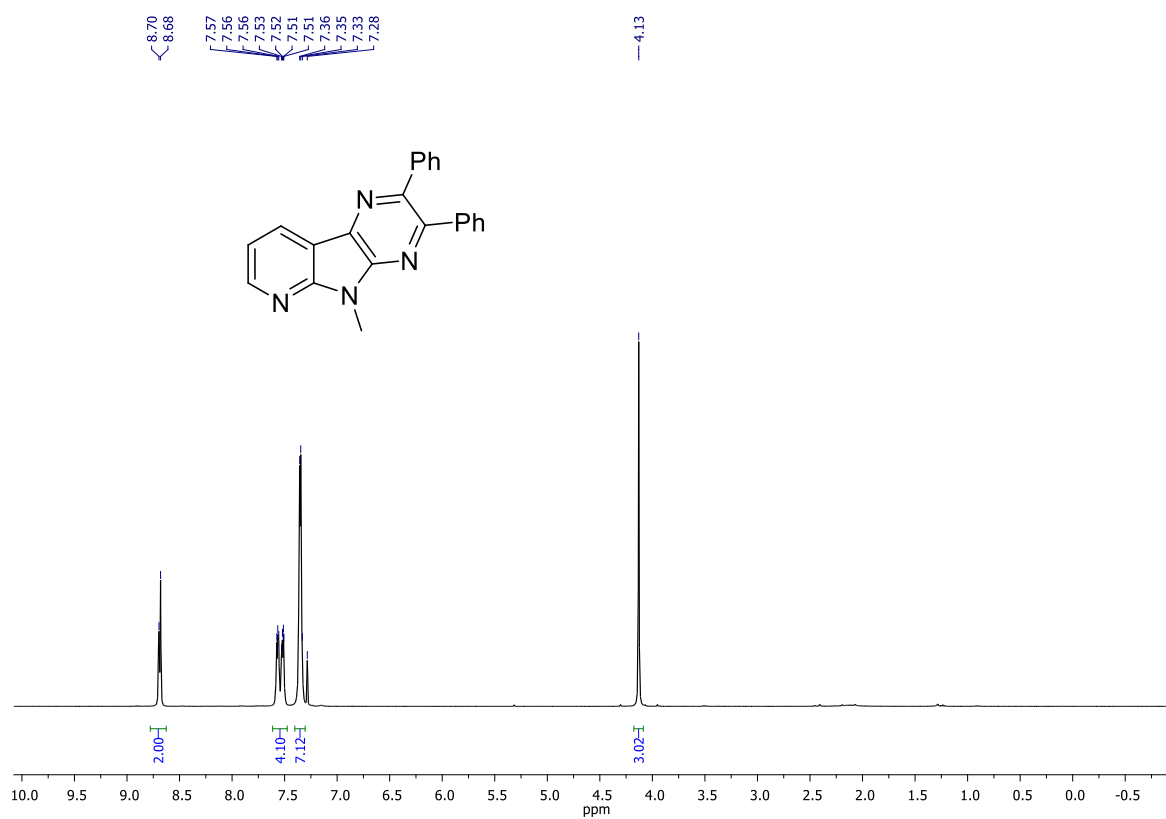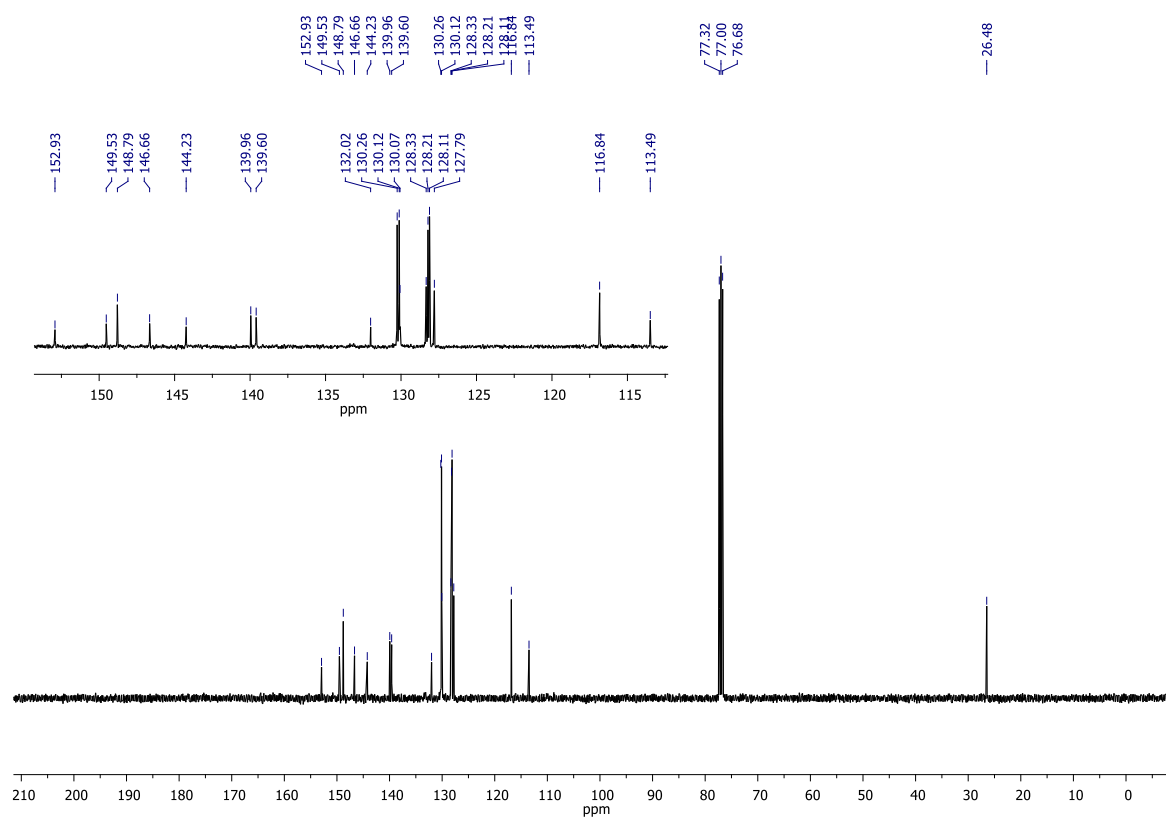



$^1\text{H}$  and  $^{13}\text{C}$  NMR spectra of compound **5a**

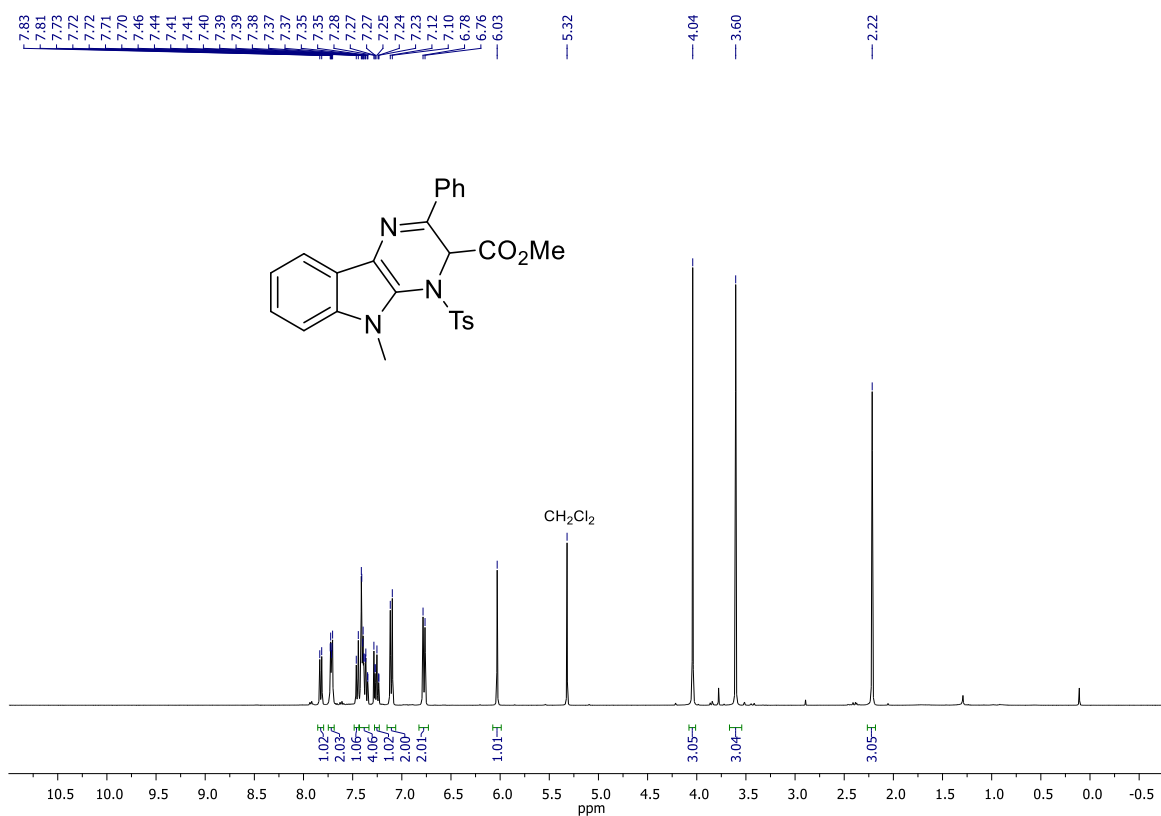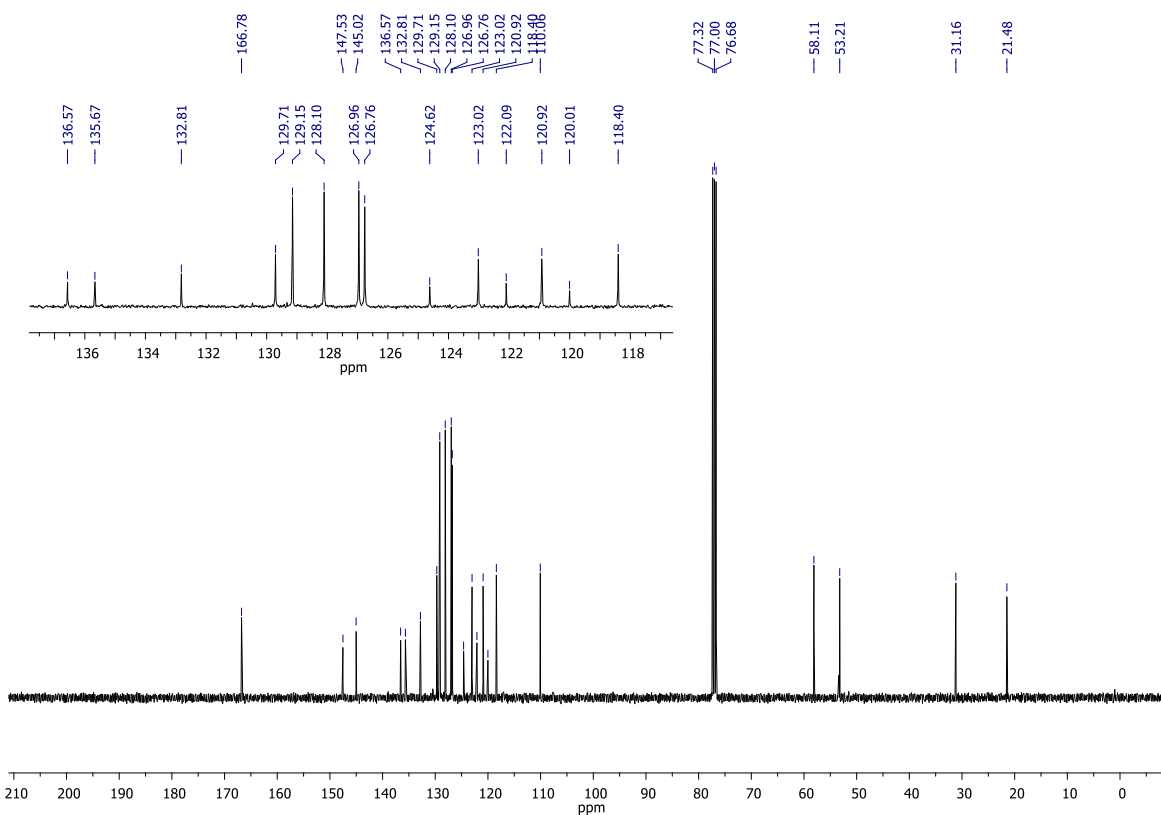

## X-Ray crystal structure of compound 4j

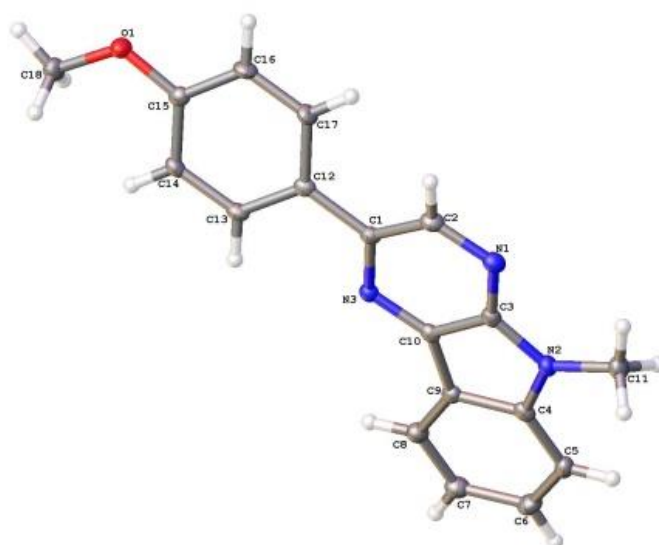

Supplement: c7ob02637d1.pdf [file c7ob02637d1.pdf]
